# Supplementary material
Source: PubMed Central journal article supplement (PMC8179221)
Supplement: pnas.2102940118.sapp.pdf [file pnas.2102940118.sapp.pdf]

# SI Appendix

## Oviductal motile cilia are essential for oocyte pickup, but dispensable for sperm and embryo transport

Shuiqiao Yuan<sup>a,b,1</sup>, Zhuqing Wang<sup>a,c</sup>, Hongying Peng<sup>a</sup>, Sean M Ward<sup>a</sup>, Grant W Hennig<sup>a</sup>, Huili Zheng<sup>a,c</sup>, Wei Yan<sup>a,c,d,1</sup>

<sup>a</sup>Department of Physiology and Cell Biology, University of Nevada, Reno School of Medicine, 1664 North Virginia Street, MS575, Reno, NV, 89557, USA

<sup>b</sup>Institute of Reproductive Health, Tongji Medical College, Huazhong University of Science and Technology, Wuhan, 430030, China

<sup>c</sup>The Lundquist Institute for Biomedical Innovation at Harbor-UCLA Medical Center, Torrance, CA 90502, USA

<sup>d</sup>Department of Medicine, David Geffen School of Medicine at UCLA, Los Angeles, CA 90095, USA

Correspondence: Wei Yan, email: [wei.yan@lundquist.org](mailto:wei.yan@lundquist.org) or [weiyanucla@ucla.edu](mailto:weiyanucla@ucla.edu), or Shuiqiao Yuan, email: [shuiqiaoyuan@hust.edu.cn](mailto:shuiqiaoyuan@hust.edu.cn)

This file contains 9 figures (Fig. S1-S9) and 4 tables (Tables S1-S4), as well as Movie Legends.

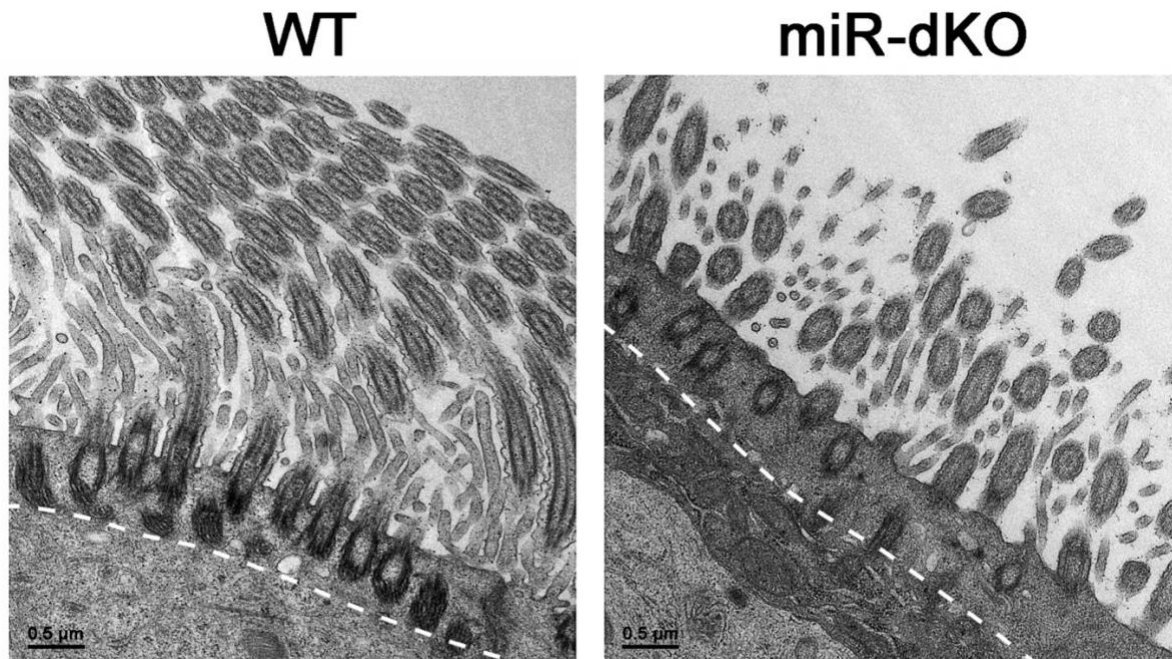

**Fig. S1.** TEM images showing the ultra-structure of the WT and miR-dKO oviductal epithelia. Basal bodies (broken dash lines) are abundant and well in the WT oviductal epithelium, but the basal bodies are much fewer and misaligned in the miR-dKO oviductal epithelium. Scale bar = 0.5  $\mu\text{m}$ . Five WT and miR-dKO mice were analyzed, and representative images are shown.

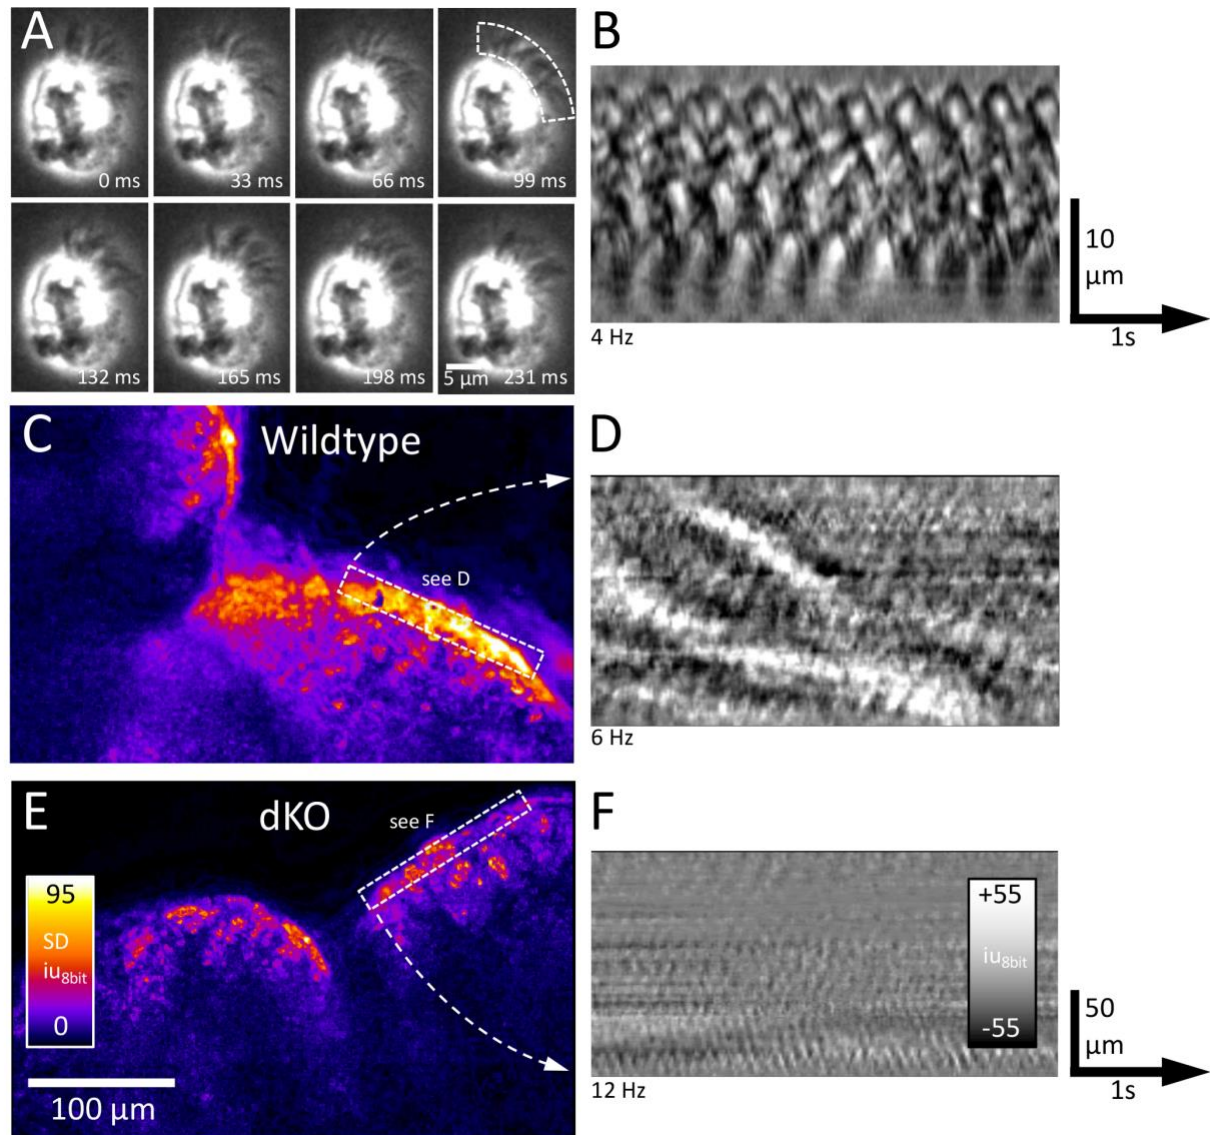

**Fig. S2.** Cilia movement in the epithelium of oviductal infundibulum. (A) Isolated ciliated cells from the infundibulum of wildtype mice were bulbous with ciliated membrane typically occupying a quadrant of the cell. (B) Oscillations of cilia, detected as changes in translucency due to regional clumping and separation of cilia was monitored using spatiotemporal maps constructed in an arc around the fringe. While the overall frequency of oscillation was relatively uniform within the fringe, slight changes in the phase of movement in small regions created interference patterns that changed every 1-2 seconds. (C) Wholemount oviduct preparation from a wildtype mouse that shows intense cilia movement, visualized as the deviation of intensity using standard deviation maps. (D) Spatiotemporal maps constructed along the edge of the epithelial lining (white dashed rectangle) showed uniform, strong oscillations from which slow propagating sweeping motions emerged (see white streaks). (E) Wholemount oviduct preparations of the infundibulum from miR-dKO (dKO) mice showed patchy regions of the epithelial lining that had weak oscillations. (F) The small amplitude oscillations of cilia occurred at a high frequency and emergent sweeping motions were absent.

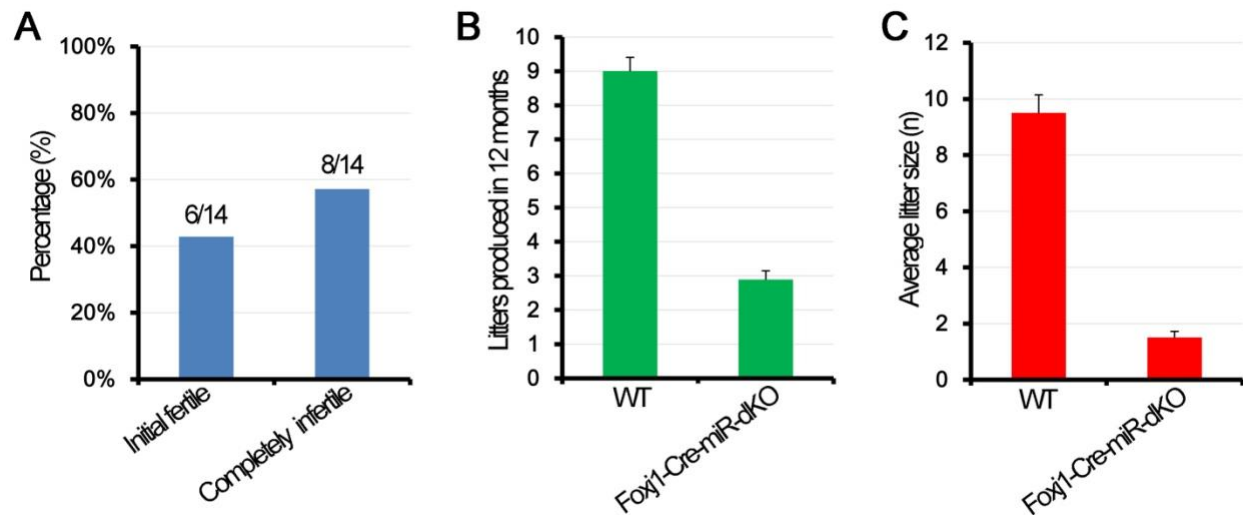

**Fig. S3.** Fecundity of female mice with cilia-specific knockout of miR-34b/c and miR-449 clusters (Foj1-Cre-miR-dKO). (A) A total of 14 Foj1-Cre-miR-dKO females were mated with fertility-proved males (one male with one female) for 12 months to test fecundity. ~57% (8 out of 14) Foj1-Cre-miR-dKO females were completely infertile, whereas the rest (~43%) were initially fertile, but their fecundity decreased rapidly with age and became completely infertile after 6 months of age. (B) The number of litters produced by WT and initially fertile Foj1-Cre-miR-dKO females (n=6) during the 12 month-long fecundity tests. (C) Litter size of WT and initially fertile Foj1-Cre-miR-dKO females (n=6) during the 12 month-long fecundity tests.

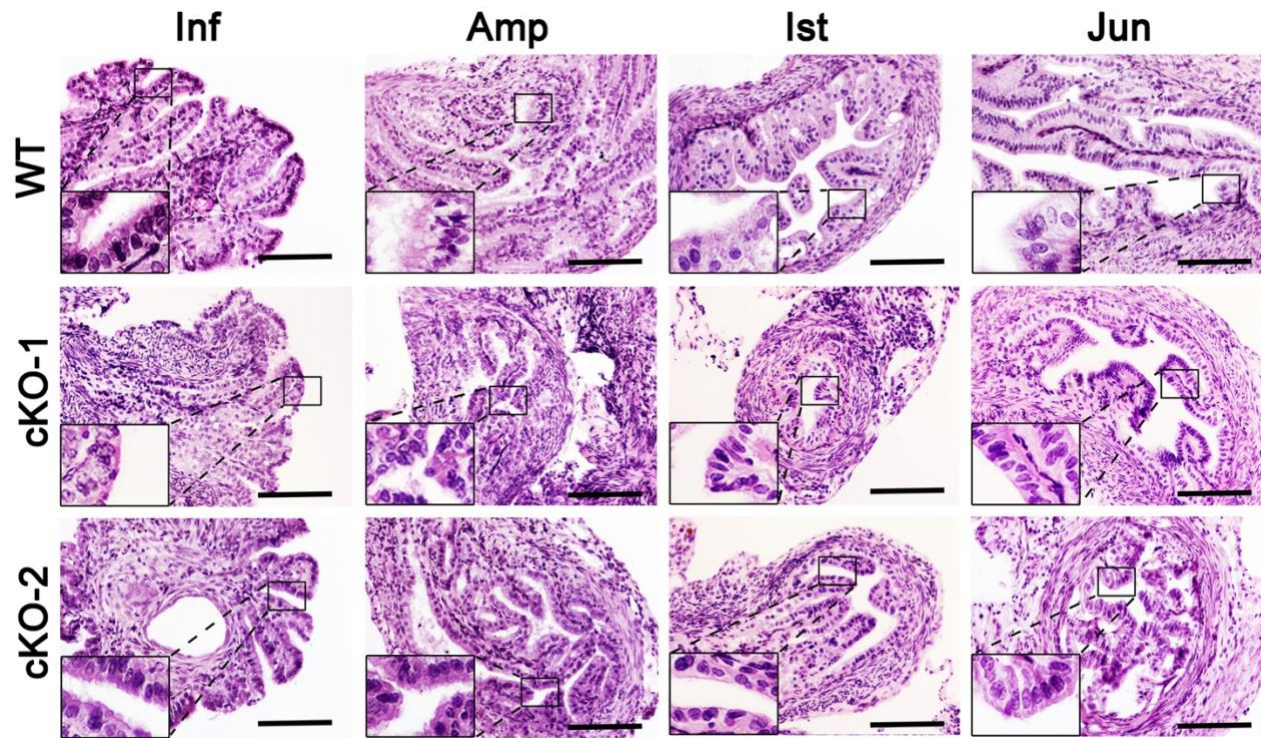

**Fig. S4.** Histology of the WT and conditional KO (Foxj1-Cre-miR-dKO) oviducts. The upper panels show normal cilia in the epithelium of infundibulum (Inf), ampulla (Amp), isthmus (Ist) and uterotubal junction (Jun). The middle panels indicate that cilia are absent in the epithelium of the four oviductal regions in those completely infertile Foxj1-Cre-miR-dKO females (cKO-1). The lower panels display partial cilia in the epithelium of the four oviductal regions in those initially fertile Foxj1-Cre-miR-dKO females (cKO-2). Insets represent the digital enlargement of framed areas in the original panels. n=4 oviducts. Scale bar = 50 $\mu$ m.

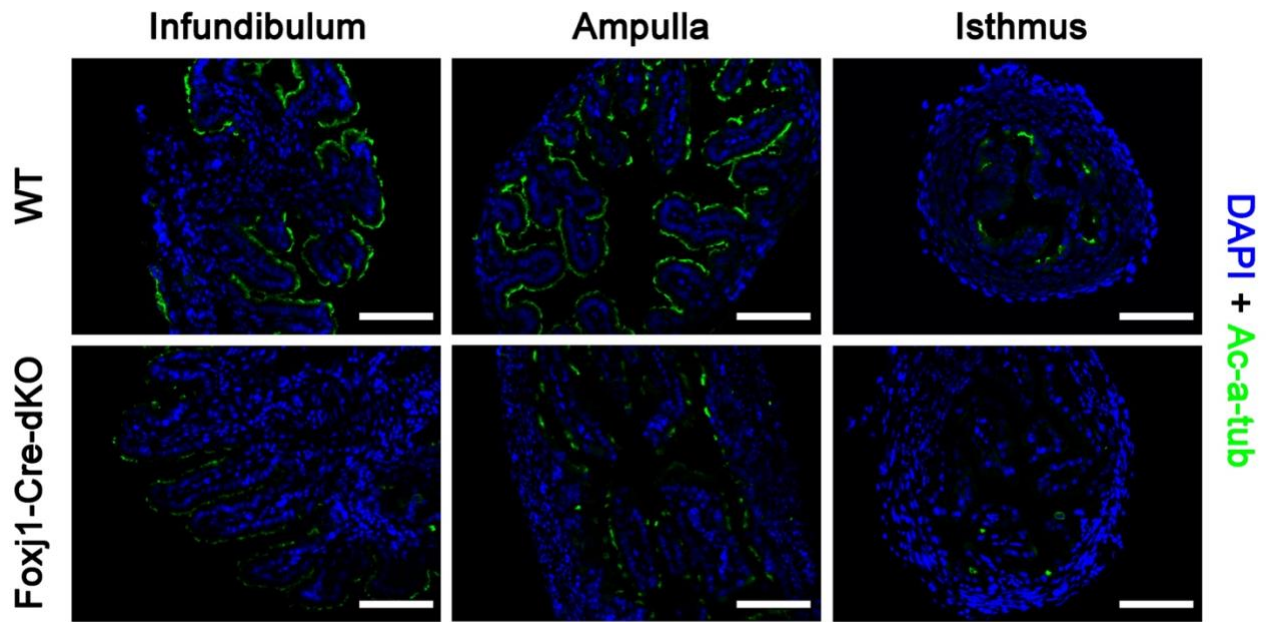

**Fig. S5.** Immunofluorescent staining of Ac-a-Tubulin, a ciliated cell marker, in the infundibulum, ampulla and isthmus of WT and Foxj1-Cre-miR-dKO oviducts. Three mice for each genotype were analyzed. Scare bar = 50 $\mu$ m.

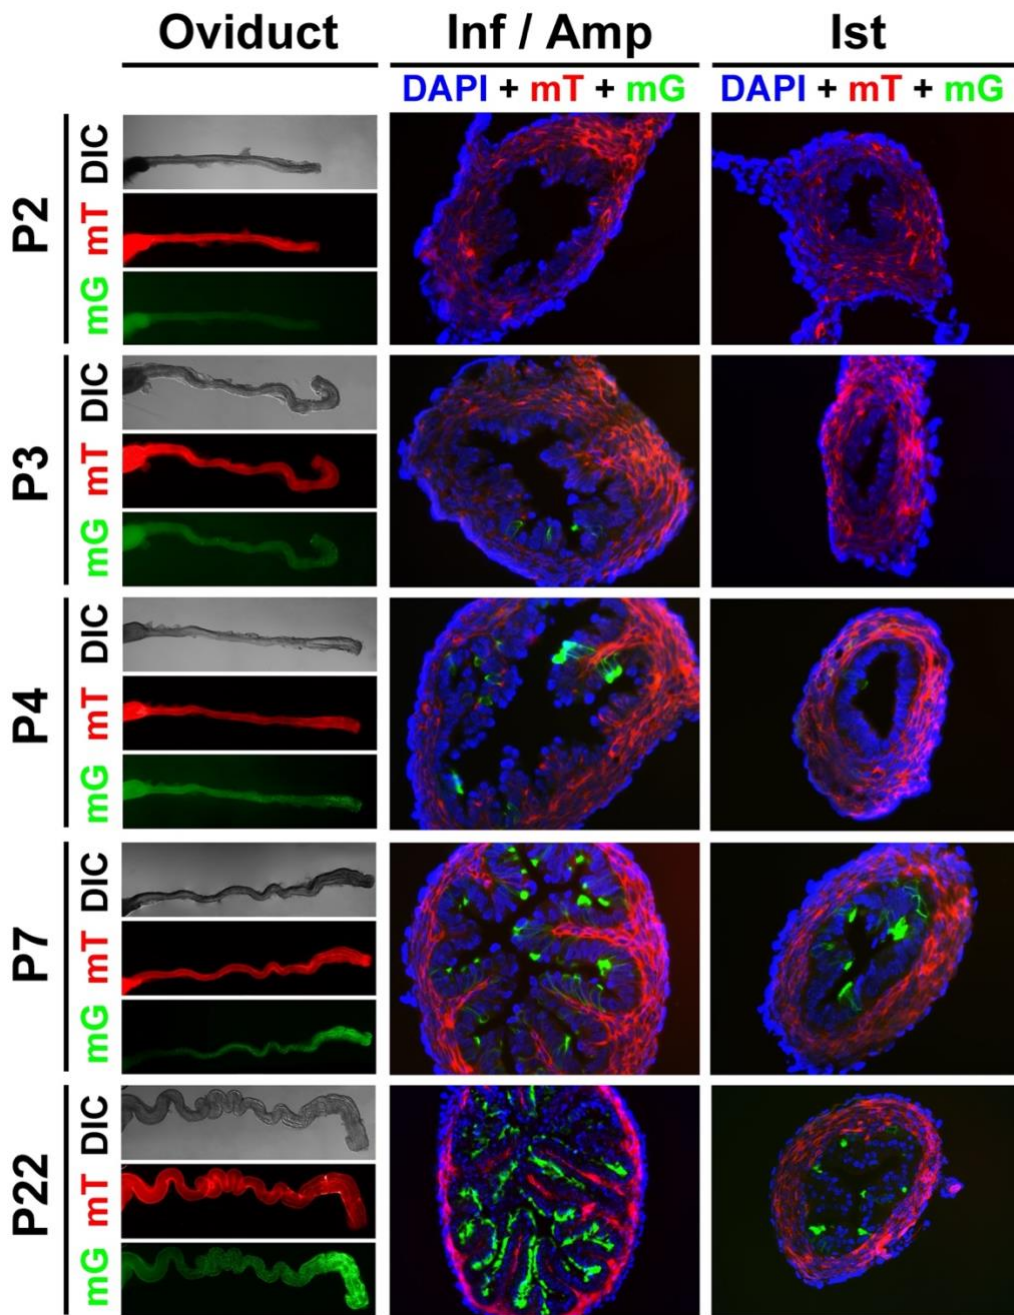

**Fig. S6.** Generation of a ciliated cell-specific, dual reporter mouse line (Foxj1-Cre-mTmG), which expresses membrane-tagged GFP (mG) in ciliated cells in the oviductal epithelium. In Foxj1-Cre-mTmG female mice, ciliated cells are mG-positive, whereas non-ciliated cells remain mT-positive (red). mG-positive ciliated cells start to appear in the Foxj1-Cre-mTmG oviducts at postnatal day 4 (P4), suggesting that Foxj1-Cre-mediated inactivation of the two miRNA clusters occurs after P4.

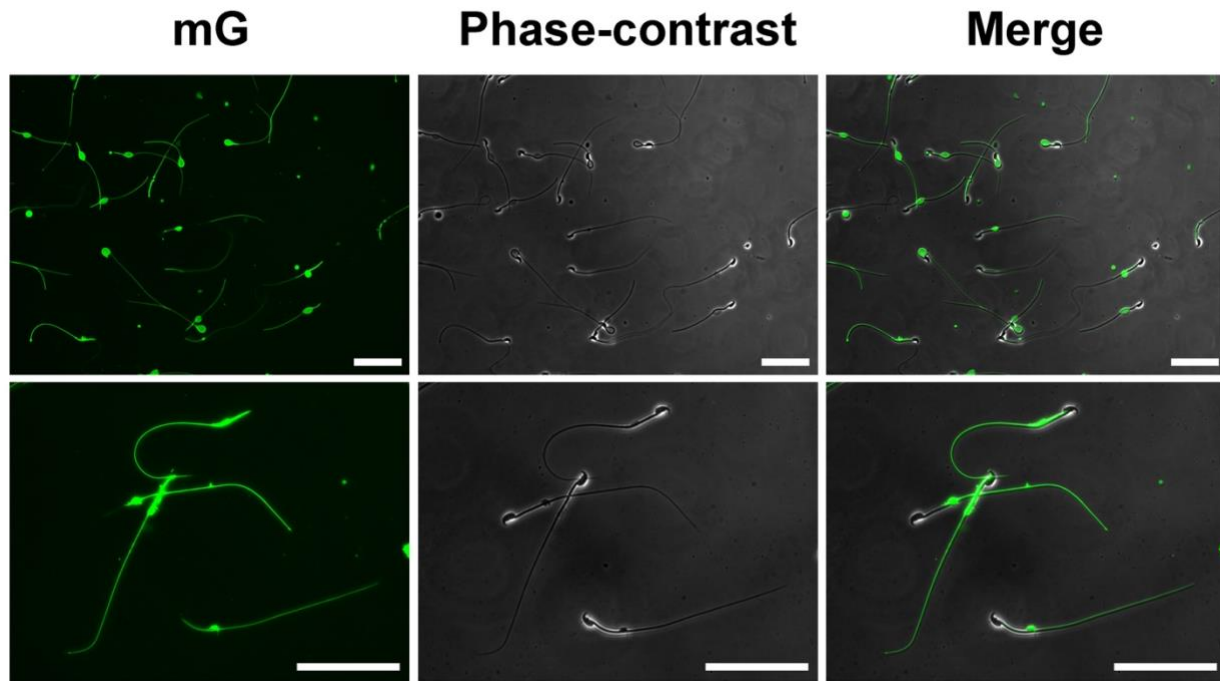

**Fig. S7.** Low- (Upper panels) and high-power (Lower panels) micrographs showing the “green” fluorescent sperm derived from *Stra8-Cre-mTmG<sup>+Tg</sup>* males. Scale bar= 50 $\mu$ m. Scale bar= 50 $\mu$ m.



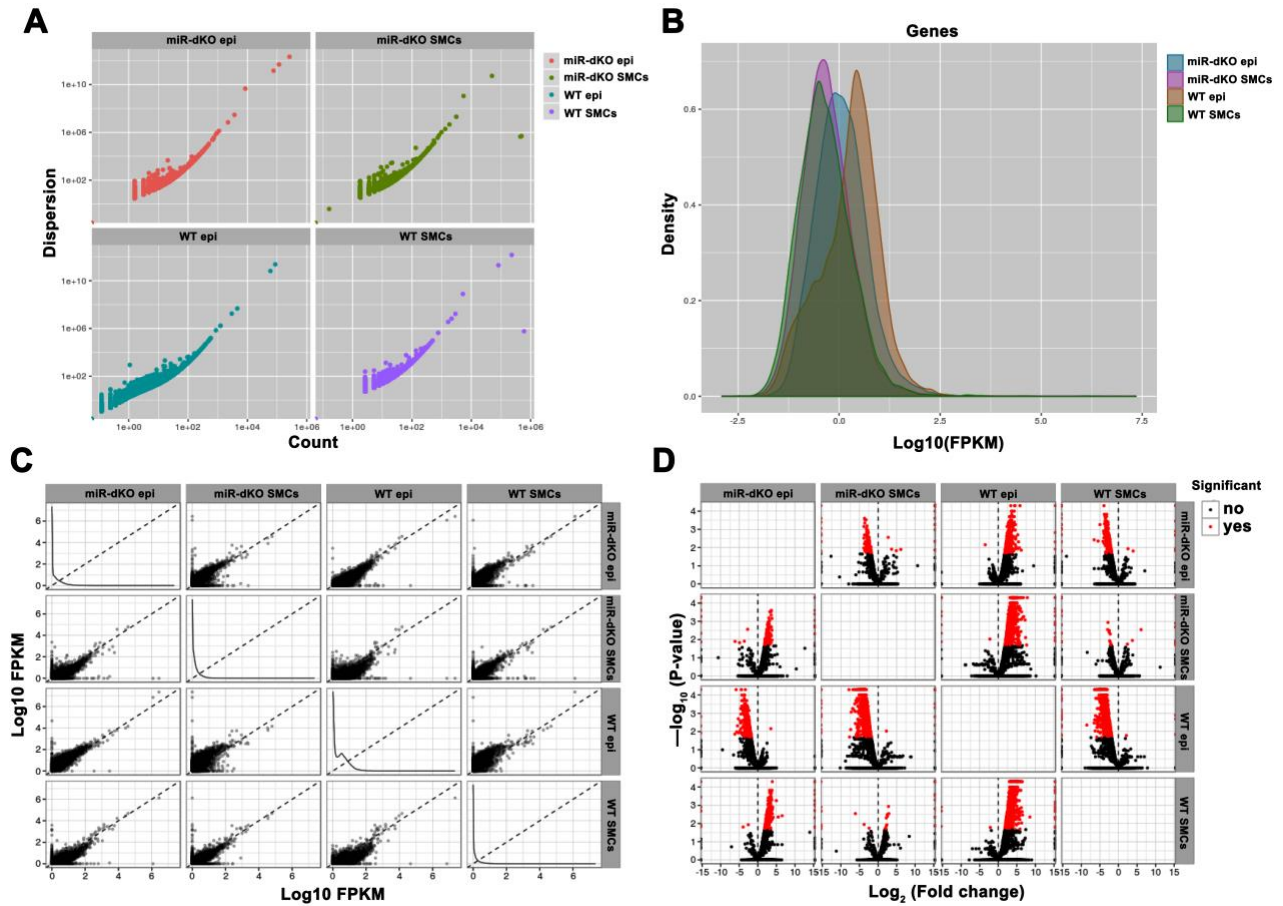

**Fig. S8.** Quality control data of the RNA-Seq analyses. (A) Overdispersion plots demonstrating the estimated overdispersion for each sample as a quality control measure. (B) Density plots showing the distribution of  $\log_{10}$  normalized FPKM scores across four sample groups. (C) Scatterplot matrix showing the pairwise scatterplots of the  $\log_{10}$  normalized FPKM scores across four sample groups. (D) The volcano plot showing the pairwise volcano plots of the  $\log_2$  fold change and associated  $\log_{10}$  p-value across four sample groups.

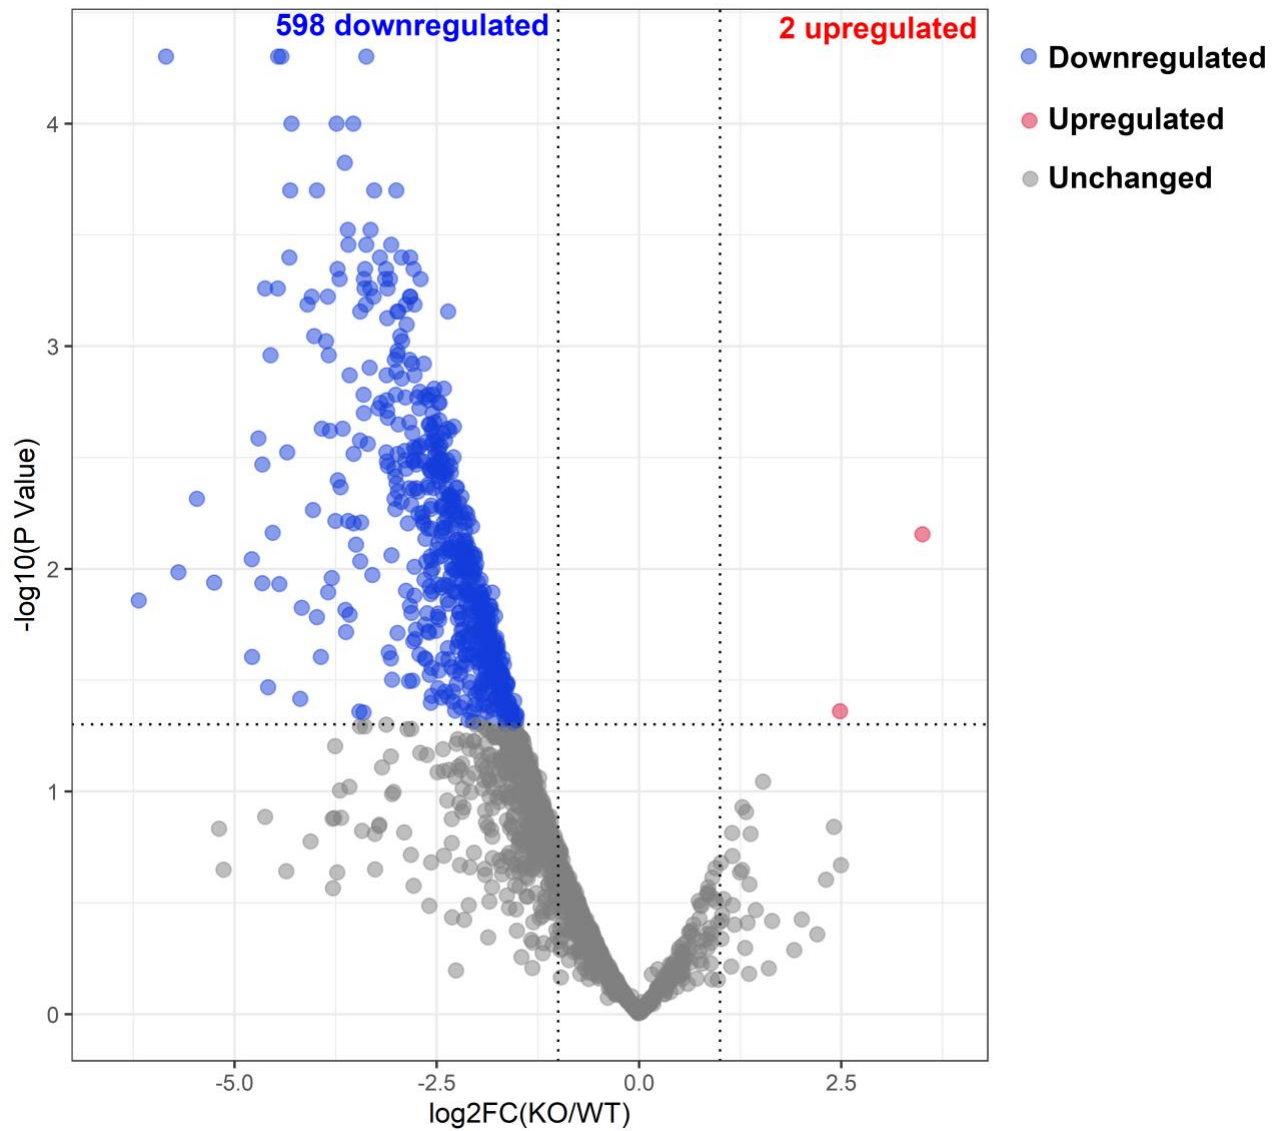

**Fig. S9.** Scatter plots showing the differential expression genes (DEGs) in the epithelium cells of miR-dKO and WT oviducts determined by RNA-seq analyses. A total of 600 genes were identified to be dysregulated in miR-dKO epithelium cells compared to that of WT controls. Blue dots indicate downregulated genes identified in miR-dKO oviductal epithelium cells, and red dots indicate upregulated genes identified in miR-dKO oviductal epithelium cells.

## **Movie Legends:**

**Movie S1.** Cilia beating in the WT oviductal epithelium.

**Movie S2.** Cilia beating in the miR-dKO oviductal epithelium.

**Movie S3.** Dispersed single cells of the WT oviductal epithelium under lower magnification (10X).

**Movie S4.** Dispersed single cells of the miR-dKO oviductal epithelium under lower magnification (10X).

**Movie S5.** One WT ciliated cell in the infundibulum region under higher magnification (100X).

**Movie S6.** One miR-dKO ciliated cell with immature cilia in the infundibulum region under higher magnification (100X).

**Table S1. The significantly dys-regulated gene transcripts as determined by RNA-Seq in oviductal epithelium cells of miR-dKO mice.**

| test_id     | gene_id     | gene          | locus                    | sample_1      | sample_2     | status | value_1  | value_2 | log2.fold_c | test_stat | p_value | significant |
|-------------|-------------|---------------|--------------------------|---------------|--------------|--------|----------|---------|-------------|-----------|---------|-------------|
| XLOC_000002 | XLOC_000002 | Tcea1         | chr1:4847774-4887990     | AAdko-FF-TTep | AAwt-FF-TTep | OK     | 2.09178  | 11.638  | 2.47604     | 3.1481    | 0.00405 | yes         |
| XLOC_000037 | XLOC_000037 | Efhc1         | chr1:20941706-20980922   | AAdko-FF-TTep | AAwt-FF-TTep | OK     | 1.28653  | 18.1676 | 3.81981     | 4.4162    | 0.0024  | yes         |
| XLOC_000095 | XLOC_000095 | Nck2          | chr1:43502595-43627363   | AAdko-FF-TTep | AAwt-FF-TTep | OK     | 3.12947  | 13.5668 | 2.11609     | 2.57625   | 0.0198  | yes         |
| XLOC_000096 | XLOC_000096 | 1500015O10Rik | chr1:43787446-43799409   | AAdko-FF-TTep | AAwt-FF-TTep | OK     | 57.6679  | 185.152 | 1.68287     | 2.12495   | 0.03565 | yes         |
| XLOC_000129 | XLOC_000129 | Bzw1          | chr1:58449979-58464170   | AAdko-FF-TTep | AAwt-FF-TTep | OK     | 2.25609  | 16.0899 | 2.83426     | 3.64622   | 0.00115 | yes         |
| XLOC_000155 | XLOC_000155 | Eef1b2        | chr1:63223404-63227060   | AAdko-FF-TTep | AAwt-FF-TTep | OK     | 12.8904  | 42.839  | 1.73263     | 2.20416   | 0.0305  | yes         |
| XLOC_000170 | XLOC_000170 | Spag16        | chr1:69873543-70771706   | AAdko-FF-TTep | AAwt-FF-TTep | OK     | 1.38781  | 12.1026 | 3.12444     | 2.51978   | 0.003   | yes         |
| XLOC_000224 | XLOC_000224 | Mff           | chr1:82721492-82749034   | AAdko-FF-TTep | AAwt-FF-TTep | OK     | 3.00802  | 11.6426 | 1.95253     | 2.3178    | 0.03295 | yes         |
| XLOC_000327 | XLOC_000327 | Serpinb11     | chr1:109258865-109278045 | AAdko-FF-TTep | AAwt-FF-TTep | OK     | 0.522608 | 14.3684 | 4.78102     | 4.0736    | 0.0249  | yes         |
| XLOC_000435 | XLOC_000435 | Ivns1abp      | chr1:153191627-153211575 | AAdko-FF-TTep | AAwt-FF-TTep | OK     | 3.10538  | 24.6544 | 2.989       | 3.95678   | 0.0007  | yes         |
| XLOC_000490 | XLOC_000490 | 4930455F23Rik | chr1:166205728-166217978 | AAdko-FF-TTep | AAwt-FF-TTep | OK     | 0.621319 | 23.6516 | 5.25046     | 5.12495   | 0.01155 | yes         |
| XLOC_000500 | XLOC_000500 | Ildr2         | chr1:168184206-168247250 | AAdko-FF-TTep | AAwt-FF-TTep | OK     | 2.79248  | 13.431  | 2.26595     | 2.80895   | 0.0066  | yes         |
| XLOC_000515 | XLOC_000515 | 1700009P17Rik | chr1:173044199-173057098 | AAdko-FF-TTep | AAwt-FF-TTep | OK     | 3.43493  | 49.0554 | 3.83606     | 4.46668   | 0.0011  | yes         |
| XLOC_000596 | XLOC_000596 | Trp53bp2      | chr1:184339297-184392567 | AAdko-FF-TTep | AAwt-FF-TTep | OK     | 3.75825  | 27.6985 | 2.88168     | 3.04349   | 0.00355 | yes         |
| XLOC_000631 | XLOC_000631 | Irf6          | chr1:194979305-194998229 | AAdko-FF-TTep | AAwt-FF-TTep | OK     | 3.62111  | 13.2488 | 1.87136     | 2.51932   | 0.01535 | yes         |
| XLOC_000640 | XLOC_000640 | Rp1           | chr1:4234693-4399358     | AAdko-FF-TTep | AAwt-FF-TTep | OK     | 1.07524  | 13.6095 | 3.66188     | 3.91114   | 0.00235 | yes         |
| XLOC_000652 | XLOC_000652 | Cops5         | chr1:10014911-10027979   | AAdko-FF-TTep | AAwt-FF-TTep | OK     | 1.27648  | 15.7767 | 3.62755     | 3.36939   | 0.0153  | yes         |
| XLOC_000658 | XLOC_000658 | Tram1         | chr1:13554782-13579945   | AAdko-FF-TTep | AAwt-FF-TTep | OK     | 10.4122  | 36.0694 | 1.7925      | 2.30255   | 0.0211  | yes         |
| XLOC_000694 | XLOC_000694 | Ptp4a1        | chr1:30997147-31006600   | AAdko-FF-TTep | AAwt-FF-TTep | OK     | 3.34353  | 16.277  | 2.28339     | 3.04545   | 0.00495 | yes         |
| XLOC_000759 | XLOC_000759 | Mfsd6         | chr1:52713147-52784162   | AAdko-FF-TTep | AAwt-FF-TTep | OK     | 4.71601  | 15.7563 | 1.74029     | 2.234     | 0.02765 | yes         |
| XLOC_000771 | XLOC_000771 | Sf3b1         | chr1:55042012-55084322   | AAdko-FF-TTep | AAwt-FF-TTep | OK     | 2.50013  | 19.3124 | 2.94945     | 3.78236   | 0.0009  | yes         |
| XLOC_000822 | XLOC_000822 | Fn1           | chr1:71632046-71699808   | AAdko-FF-TTep | AAwt-FF-TTep | OK     | 3.54584  | 23.4486 | 2.7253      | 3.18388   | 0.00565 | yes         |
| XLOC_000829 | XLOC_000829 | Igfbp5        | chr1:72904638-72921439   | AAdko-FF-TTep | AAwt-FF-TTep | OK     | 1.87156  | 12.274  | 2.71329     | 3.59642   | 0.0016  | yes         |
| XLOC_000844 | XLOC_000844 | Ccdc108       | chr1:74948646-74982173   | AAdko-FF-TTep | AAwt-FF-TTep | OK     | 4.08264  | 47.1016 | 3.5282      | 3.61303   | 0.00305 | yes         |
| XLOC_000868 | XLOC_000868 | Cul3          | chr1:80262198-80337330   | AAdko-FF-TTep | AAwt-FF-TTep | OK     | 1.9603   | 11.8759 | 2.59889     | 3.40535   | 0.00225 | yes         |
| XLOC_000870 | XLOC_000870 | Irs1          | chr1:82229679-82288014   | AAdko-FF-TTep | AAwt-FF-TTep | OK     | 2.84388  | 15.2099 | 2.41907     | 3.03421   | 0.00655 | yes         |
| XLOC_000901 | XLOC_000901 | Arl4c         | chr1:90594800-90598766   | AAdko-FF-TTep | AAwt-FF-TTep | OK     | 3.3762   | 12.1942 | 1.85272     | 2.47961   | 0.01865 | yes         |
| XLOC_000971 | XLOC_000971 | Actr3         | chr1:127289481-127332304 | AAdko-FF-TTep | AAwt-FF-TTep | OK     | 4.86165  | 17.2199 | 1.82456     | 2.41121   | 0.01715 | yes         |
| XLOC_000981 | XLOC_000981 | Dars          | chr1:130260283-130313993 | AAdko-FF-TTep | AAwt-FF-TTep | OK     | 2.02663  | 14.5157 | 2.84045     | 2.76006   | 0.00435 | yes         |
| XLOC_000984 | XLOC_000984 | Cd55          | chr1:132334755-132359833 | AAdko-FF-TTep | AAwt-FF-TTep | OK     | 3.94447  | 17.4869 | 2.14837     | 2.77156   | 0.00955 | yes         |
| XLOC_001120 | XLOC_001120 | Atp1b1        | chr1:166237805-166388486 | AAdko-FF-TTep | AAwt-FF-TTep | OK     | 2.4851   | 14.5457 | 2.54922     | 2.7912    | 0.01265 | yes         |
| XLOC_001140 | XLOC_001140 | Pbx1          | chr1:170049494-170362389 | AAdko-FF-TTep | AAwt-FF-TTep | OK     | 3.64854  | 16.3565 | 2.16447     | 2.72827   | 0.00895 | yes         |
| XLOC_001171 | XLOC_001171 | Pea15a        | chr1:174126859-174136912 | AAdko-FF-TTep | AAwt-FF-TTep | OK     | 5.59173  | 20.1649 | 1.85048     | 2.47927   | 0.01465 | yes         |
| XLOC_001209 | XLOC_001209 | Adss          | chr1:179693308-179726640 | AAdko-FF-TTep | AAwt-FF-TTep | OK     | 2.13389  | 12.6792 | 2.5709      | 3.25595   | 0.0052  | yes         |
| XLOC_001219 | XLOC_001219 | H3f3a         | chr1:182732698-182743734 | AAdko-FF-TTep | AAwt-FF-TTep | OK     | 23.6437  | 114.783 | 2.27937     | 2.9502    | 0.0055  | yes         |
| XLOC_001432 | XLOC_001432 | Arhgap18      | chr10:26492317-26638454  | AAdko-FF-TTep | AAwt-FF-TTep | OK     | 1.01014  | 13.4665 | 3.73675     | 4.82752   | 0.0001  | yes         |
| XLOC_001504 | XLOC_001504 | Smpd13a       | chr10:57514349-57531636  | AAdko-FF-TTep | AAwt-FF-TTep | OK     | 4.34163  | 15.5204 | 1.83786     | 2.31601   | 0.0302  | yes         |
| XLOC_001514 | XLOC_001514 | Micu1         | chr10:59165382-59326870  | AAdko-FF-TTep | AAwt-FF-TTep | OK     | 2.30177  | 14.7034 | 2.67533     | 3.20284   | 0.0056  | yes         |
| XLOC_001573 | XLOC_001573 | Vpreb3        | chr10:75405742-75412394  | AAdko-FF-TTep | AAwt-FF-TTep | OK     | 7.16544  | 42.2535 | 2.55994     | 2.3438    | 0.03715 | yes         |
| XLOC_001579 | XLOC_001579 | 2610028H24Rik | chr10:75911825-75978602  | AAdko-FF-TTep | AAwt-FF-TTep | OK     | 3.5059   | 17.9268 | 2.35427     | 2.38996   | 0.02555 | yes         |
| XLOC_001701 | XLOC_001701 | Tcp11l2       | chr10:84039691-84077100  | AAdko-FF-TTep | AAwt-FF-TTep | OK     | 4.77109  | 18.6688 | 1.96824     | 2.61737   | 0.0141  | yes         |

|             |             |               |                           |               |              |    |         |         |         |         |         |     |
|-------------|-------------|---------------|---------------------------|---------------|--------------|----|---------|---------|---------|---------|---------|-----|
| XLOC_001856 | XLOC_001856 | Ptges3        | chr10:127496037-127514310 | AAdko-FF-TTep | AAwt-FF-TTep | OK | 10.2239 | 59.6759 | 2.5452  | 3.24557 | 0.0034  | yes |
| XLOC_001868 | XLOC_001868 | Cs            | chr10:127774887-127799535 | AAdko-FF-TTep | AAwt-FF-TTep | OK | 2.22961 | 15.1333 | 2.76286 | 3.55357 | 0.0029  | yes |
| XLOC_001909 | XLOC_001909 | Esr1          | chr10:5340926-5734686     | AAdko-FF-TTep | AAwt-FF-TTep | OK | 12.8338 | 66.0622 | 2.36388 | 1.87058 | 0.0227  | yes |
| XLOC_001953 | XLOC_001953 | Myb           | chr10:20844735-20880790   | AAdko-FF-TTep | AAwt-FF-TTep | OK | 2.05083 | 16.2277 | 2.98418 | 3.88982 | 0.00105 | yes |
| XLOC_001988 | XLOC_001988 | Tpd52l1       | chr10:31052096-31165727   | AAdko-FF-TTep | AAwt-FF-TTep | OK | 3.25432 | 14.413  | 2.14694 | 2.46099 | 0.0244  | yes |
| XLOC_001990 | XLOC_001990 | Rnf217        | chr10:31221589-31329531   | AAdko-FF-TTep | AAwt-FF-TTep | OK | 4.09166 | 14.9168 | 1.86618 | 2.37844 | 0.02065 | yes |
| XLOC_002055 | XLOC_002055 | Serinc1       | chr10:57235581-57252335   | AAdko-FF-TTep | AAwt-FF-TTep | OK | 2.53825 | 11.9936 | 2.24036 | 2.91407 | 0.0088  | yes |
| XLOC_002076 | XLOC_002076 | Tspan15       | chr10:61648143-61693966   | AAdko-FF-TTep | AAwt-FF-TTep | OK | 3.2208  | 11.6718 | 1.85754 | 2.43088 | 0.02185 | yes |
| XLOC_002227 | XLOC_002227 | AppI2         | chr10:83062778-83111421   | AAdko-FF-TTep | AAwt-FF-TTep | OK | 7.36628 | 23.3565 | 1.66482 | 2.08231 | 0.04575 | yes |
| XLOC_002229 | XLOC_002229 | Ckap4         | chr10:83989049-83996633   | AAdko-FF-TTep | AAwt-FF-TTep | OK | 10.7571 | 45.806  | 2.09025 | 2.58017 | 0.01765 | yes |
| XLOC_002235 | XLOC_002235 | D10Wsu52e     | chr10:85401381-85420538   | AAdko-FF-TTep | AAwt-FF-TTep | OK | 3.84423 | 16.449  | 2.09723 | 2.5107  | 0.02415 | yes |
| XLOC_002238 | XLOC_002238 | Hsp90b1       | chr10:86153585-86168189   | AAdko-FF-TTep | AAwt-FF-TTep | OK | 7.57662 | 25.8914 | 1.77285 | 2.25712 | 0.03135 | yes |
| XLOC_002258 | XLOC_002258 | Rmst          | chr10:91544490-91627923   | AAdko-FF-TTep | AAwt-FF-TTep | OK | 2.6356  | 20.1517 | 2.9347  | 3.87672 | 0.0004  | yes |
| XLOC_002287 | XLOC_002287 | Nudt4         | chr10:95009640-95026801   | AAdko-FF-TTep | AAwt-FF-TTep | OK | 6.35937 | 54.9173 | 3.11031 | 3.8335  | 0.00055 | yes |
| XLOC_002316 | XLOC_002316 | Atxn7l3b      | chr10:112362483-112366082 | AAdko-FF-TTep | AAwt-FF-TTep | OK | 2.50433 | 12.6306 | 2.33442 | 3.00983 | 0.00635 | yes |
| XLOC_002330 | XLOC_002330 | Cct2          | chr10:116488053-116500870 | AAdko-FF-TTep | AAwt-FF-TTep | OK | 5.79206 | 28.3012 | 2.28871 | 3.08426 | 0.0023  | yes |
| XLOC_002340 | XLOC_002340 | Rap1b         | chr10:117250936-117283073 | AAdko-FF-TTep | AAwt-FF-TTep | OK | 1.35213 | 11.7513 | 3.11952 | 3.72446 | 0.00175 | yes |
| XLOC_002537 | XLOC_002537 | Sec14l3       | chr11:3964855-3978993     | AAdko-FF-TTep | AAwt-FF-TTep | OK | 1.37408 | 19.7852 | 3.84788 | 4.94456 | 0.0006  | yes |
| XLOC_002579 | XLOC_002579 | Ppp3r1        | chr11:17059300-17100383   | AAdko-FF-TTep | AAwt-FF-TTep | OK | 2.00104 | 12.0689 | 2.59247 | 3.31859 | 0.00355 | yes |
| XLOC_002584 | XLOC_002584 | Rab1          | chr11:20101604-20126859   | AAdko-FF-TTep | AAwt-FF-TTep | OK | 3.82114 | 19.1833 | 2.32778 | 3.11075 | 0.00345 | yes |
| XLOC_002591 | XLOC_002591 | Cct4          | chr11:22890592-22904433   | AAdko-FF-TTep | AAwt-FF-TTep | OK | 5.56517 | 24.3491 | 2.12937 | 2.84304 | 0.0081  | yes |
| XLOC_002611 | XLOC_002611 | Rtn4          | chr11:29592897-29926033   | AAdko-FF-TTep | AAwt-FF-TTep | OK | 3.41814 | 18.5495 | 2.44009 | 3.0056  | 0.00875 | yes |
| XLOC_002693 | XLOC_002693 | Hnrnp1        | chr11:50191220-50200260   | AAdko-FF-TTep | AAwt-FF-TTep | OK | 4.40167 | 29.4234 | 2.74084 | 3.47241 | 0.0017  | yes |
| XLOC_002710 | XLOC_002710 | Ppp2ca        | chr11:51912325-51936916   | AAdko-FF-TTep | AAwt-FF-TTep | OK | 5.82334 | 20.1921 | 1.79387 | 2.39229 | 0.02435 | yes |
| XLOC_002712 | XLOC_002712 | Skp1a         | chr11:52045496-52060360   | AAdko-FF-TTep | AAwt-FF-TTep | OK | 9.61012 | 36.8834 | 1.94035 | 2.58727 | 0.0136  | yes |
| XLOC_002714 | XLOC_002714 | 9530068E07Rik | chr11:52209929-52222225   | AAdko-FF-TTep | AAwt-FF-TTep | OK | 8.67055 | 25.2601 | 1.54266 | 2.07864 | 0.03925 | yes |
| XLOC_002781 | XLOC_002781 | Lrrc48        | chr11:60166881-60207835   | AAdko-FF-TTep | AAwt-FF-TTep | OK | 1.34812 | 33.9507 | 4.65442 | 4.54548 | 0.0116  | yes |
| XLOC_002785 | XLOC_002785 | Alkbh5        | chr11:60351184-60372014   | AAdko-FF-TTep | AAwt-FF-TTep | OK | 3.96961 | 12.955  | 1.70644 | 2.27858 | 0.03045 | yes |
| XLOC_002812 | XLOC_002812 | Tvp23b        | chr11:62692991-62708686   | AAdko-FF-TTep | AAwt-FF-TTep | OK | 5.53881 | 22.8388 | 2.04384 | 2.57483 | 0.01845 | yes |
| XLOC_002815 | XLOC_002815 | Pmp22         | chr11:62945011-62973048   | AAdko-FF-TTep | AAwt-FF-TTep | OK | 4.20033 | 18.7006 | 2.15451 | 2.75821 | 0.01225 | yes |
| XLOC_002899 | XLOC_002899 | Txndc17       | chr11:72021055-72023989   | AAdko-FF-TTep | AAwt-FF-TTep | OK | 3.84585 | 19.5247 | 2.34392 | 2.96335 | 0.00825 | yes |
| XLOC_002909 | XLOC_002909 | Atp2a3        | chr11:72774670-72806545   | AAdko-FF-TTep | AAwt-FF-TTep | OK | 1.4884  | 12.4011 | 3.05864 | 3.37335 | 0.0087  | yes |
| XLOC_002947 | XLOC_002947 | Prpf8         | chr11:75300278-75322949   | AAdko-FF-TTep | AAwt-FF-TTep | OK | 3.22167 | 12.4793 | 1.95365 | 2.49076 | 0.021   | yes |
| XLOC_002956 | XLOC_002956 | Ywhae         | chr11:75546388-75579343   | AAdko-FF-TTep | AAwt-FF-TTep | OK | 12.6922 | 64.7453 | 2.35084 | 2.86438 | 0.0081  | yes |
| XLOC_002957 | XLOC_002957 | 1700016K19Rik | chr11:75813413-75817071   | AAdko-FF-TTep | AAwt-FF-TTep | OK | 3.77901 | 32.28   | 3.09456 | 2.9801  | 0.02375 | yes |
| XLOC_002984 | XLOC_002984 | 2610507B11Rik | chr11:78075255-78104127   | AAdko-FF-TTep | AAwt-FF-TTep | OK | 4.00106 | 14.2358 | 1.83107 | 2.32323 | 0.0282  | yes |
| XLOC_003106 | XLOC_003106 | Spop          | chr11:95275396-95354724   | AAdko-FF-TTep | AAwt-FF-TTep | OK | 3.63906 | 12.5564 | 1.78678 | 2.32364 | 0.0262  | yes |
| XLOC_003181 | XLOC_003181 | Eif1          | chr11:100181309-100184493 | AAdko-FF-TTep | AAwt-FF-TTep | OK | 9.40549 | 50.636  | 2.42859 | 3.16773 | 0.00455 | yes |
| XLOC_003199 | XLOC_003199 | Vps25         | chr11:101115056-101120860 | AAdko-FF-TTep | AAwt-FF-TTep | OK | 3.30327 | 16.9799 | 2.36186 | 2.35461 | 0.0376  | yes |
| XLOC_003274 | XLOC_003274 | Prkar1a       | chr11:109512262-109530962 | AAdko-FF-TTep | AAwt-FF-TTep | OK | 2.61994 | 12.2524 | 2.22545 | 2.86523 | 0.00925 | yes |
| XLOC_003286 | XLOC_003286 | Dnaic2        | chr11:114588725-114619200 | AAdko-FF-TTep | AAwt-FF-TTep | OK | 1.87811 | 28.474  | 3.92229 | 4.4492  | 0.00235 | yes |
| XLOC_003287 | XLOC_003287 | Kif19a        | chr11:114626702-114651889 | AAdko-FF-TTep | AAwt-FF-TTep | OK | 3.46433 | 15.0931 | 2.12324 | 2.71989 | 0.01315 | yes |
| XLOC_003327 | XLOC_003327 | Sec14l1       | chr11:116976485-117020582 | AAdko-FF-TTep | AAwt-FF-TTep | OK | 4.98668 | 16.7545 | 1.7484  | 2.18665 | 0.02395 | yes |

|             |             |          |                           |               |              |    |          |         |         |          |         |     |
|-------------|-------------|----------|---------------------------|---------------|--------------|----|----------|---------|---------|----------|---------|-----|
| XLOC_003351 | XLOC_003351 | Baiap2   | chr11:119804405-119868096 | AAdko-FF-TTep | AAwt-FF-TTep | OK | 4.39341  | 23.9174 | 2.44465 | 3.02822  | 0.00525 | yes |
| XLOC_003359 | XLOC_003359 | Hgs      | chr11:120328948-120345298 | AAdko-FF-TTep | AAwt-FF-TTep | OK | 2.29166  | 12.0183 | 2.39077 | 2.9378   | 0.00835 | yes |
| XLOC_003401 | XLOC_003401 | Ewsr1    | chr11:4969690-4999205     | AAdko-FF-TTep | AAwt-FF-TTep | OK | 5.05775  | 26.4289 | 2.38555 | 3.12234  | 0.00435 | yes |
| XLOC_003403 | XLOC_003403 | Kremen1  | chr11:5091555-5161613     | AAdko-FF-TTep | AAwt-FF-TTep | OK | 4.10727  | 15.1659 | 1.88458 | 2.49677  | 0.01805 | yes |
| XLOC_003446 | XLOC_003446 | Meis1    | chr11:18780430-18919014   | AAdko-FF-TTep | AAwt-FF-TTep | OK | 3.8672   | 21.3163 | 2.46259 | 3.25336  | 0.0018  | yes |
| XLOC_003447 | XLOC_003447 | Actr2    | chr11:19962306-20012954   | AAdko-FF-TTep | AAwt-FF-TTep | OK | 1.74207  | 18.0345 | 3.37189 | 4.44648  | 0.00035 | yes |
| XLOC_003455 | XLOC_003455 | Mdh1     | chr11:21456694-21471937   | AAdko-FF-TTep | AAwt-FF-TTep | OK | 8.20551  | 37.0927 | 2.17647 | 2.87144  | 0.00875 | yes |
| XLOC_003471 | XLOC_003471 | Ccdc104  | chr11:29121535-29147272   | AAdko-FF-TTep | AAwt-FF-TTep | OK | 1.3443   | 13.5008 | 3.32812 | 3.90296  | 0.00125 | yes |
| XLOC_003489 | XLOC_003489 | Npm1     | chr11:33052497-33063206   | AAdko-FF-TTep | AAwt-FF-TTep | OK | 9.36019  | 40.8678 | 2.12636 | 2.84033  | 0.0089  | yes |
| XLOC_003492 | XLOC_003492 | Gabrp    | chr11:33450780-33478957   | AAdko-FF-TTep | AAwt-FF-TTep | OK | 4.74642  | 20.3957 | 2.10335 | 2.76717  | 0.0097  | yes |
| XLOC_003554 | XLOC_003554 | Ube2b    | chr11:51798647-51813968   | AAdko-FF-TTep | AAwt-FF-TTep | OK | 3.33166  | 15.9549 | 2.25969 | 2.92537  | 0.0074  | yes |
| XLOC_003604 | XLOC_003604 | Fam183b  | chr11:58606303-58615462   | AAdko-FF-TTep | AAwt-FF-TTep | OK | 4.52468  | 25.1068 | 2.47219 | 2.4826   | 0.0287  | yes |
| XLOC_003641 | XLOC_003641 | Rnf112   | chr11:61261943-61267388   | AAdko-FF-TTep | AAwt-FF-TTep | OK | 3.56146  | 13.8574 | 1.96011 | 2.40905  | 0.02835 | yes |
| XLOC_003662 | XLOC_003662 | Dnahc9   | chr11:65644825-65982053   | AAdko-FF-TTep | AAwt-FF-TTep | OK | 1.50284  | 15.7136 | 3.38625 | 4.07772  | 0.00045 | yes |
| XLOC_003741 | XLOC_003741 | Tekt1    | chr11:72158221-72175382   | AAdko-FF-TTep | AAwt-FF-TTep | OK | 1.186    | 25.8146 | 4.44401 | 4.30157  | 0.0117  | yes |
| XLOC_003770 | XLOC_003770 | Pafah1b1 | chr11:74487450-74537886   | AAdko-FF-TTep | AAwt-FF-TTep | OK | 1.79356  | 12.7614 | 2.83089 | 3.79606  | 0.0006  | yes |
| XLOC_003785 | XLOC_003785 | Glod4    | chr11:76033896-76057201   | AAdko-FF-TTep | AAwt-FF-TTep | OK | 2.02177  | 14.0107 | 2.79284 | 3.44182  | 0.0033  | yes |
| XLOC_003787 | XLOC_003787 | Abr      | chr11:76230235-76391229   | AAdko-FF-TTep | AAwt-FF-TTep | OK | 3.27428  | 12.2482 | 1.90332 | 2.4155   | 0.01925 | yes |
| XLOC_003827 | XLOC_003827 | Myo1d    | chr11:80295628-80593527   | AAdko-FF-TTep | AAwt-FF-TTep | OK | 3.0014   | 18.8258 | 2.649   | 3.49336  | 0.0017  | yes |
| XLOC_003848 | XLOC_003848 | Dusp14   | chr11:83861546-83881859   | AAdko-FF-TTep | AAwt-FF-TTep | OK | 4.91626  | 22.6323 | 2.20275 | 2.49724  | 0.02785 | yes |
| XLOC_003870 | XLOC_003870 | Cltc     | chr11:86508154-86570994   | AAdko-FF-TTep | AAwt-FF-TTep | OK | 3.35036  | 16.941  | 2.33813 | 3.01498  | 0.00475 | yes |
| XLOC_003884 | XLOC_003884 | Msi2     | chr11:88152883-88579581   | AAdko-FF-TTep | AAwt-FF-TTep | OK | 8.99393  | 40.0928 | 2.15632 | 2.03503  | 0.0399  | yes |
| XLOC_003925 | XLOC_003925 | Ube2z    | chr11:95908749-95926678   | AAdko-FF-TTep | AAwt-FF-TTep | OK | 5.35975  | 16.4885 | 1.62122 | 2.15059  | 0.0394  | yes |
| XLOC_003935 | XLOC_003935 | Lrrc46   | chr11:96895915-96902683   | AAdko-FF-TTep | AAwt-FF-TTep | OK | 2.51771  | 17.4227 | 2.79078 | 2.82885  | 0.0212  | yes |
| XLOC_003938 | XLOC_003938 | Kpnb1    | chr11:97021023-97049206   | AAdko-FF-TTep | AAwt-FF-TTep | OK | 2.00518  | 12.1893 | 2.60381 | 3.49495  | 0.00175 | yes |
| XLOC_003947 | XLOC_003947 | Rpl23    | chr11:97638839-97643753   | AAdko-FF-TTep | AAwt-FF-TTep | OK | 23.5698  | 86.0118 | 1.86759 | 2.36435  | 0.01695 | yes |
| XLOC_004023 | XLOC_004023 | Jup      | chr11:100230169-100259104 | AAdko-FF-TTep | AAwt-FF-TTep | OK | 5.46193  | 17.2287 | 1.65733 | 2.19537  | 0.035   | yes |
| XLOC_004032 | XLOC_004032 | Rab5c    | chr11:100576579-100599444 | AAdko-FF-TTep | AAwt-FF-TTep | OK | 9.68562  | 29.7067 | 1.61687 | 2.13409  | 0.0423  | yes |
| XLOC_004086 | XLOC_004086 | Gosr2    | chr11:103538162-103559024 | AAdko-FF-TTep | AAwt-FF-TTep | OK | 2.51396  | 15.8855 | 2.65967 | 3.37571  | 0.0033  | yes |
| XLOC_004098 | XLOC_004098 | Smarcd2  | chr11:106124484-106134286 | AAdko-FF-TTep | AAwt-FF-TTep | OK | 5.14705  | 15.7757 | 1.61588 | 2.06494  | 0.04555 | yes |
| XLOC_004105 | XLOC_004105 | Tex2     | chr11:106363452-106474244 | AAdko-FF-TTep | AAwt-FF-TTep | OK | 3.72555  | 12.3765 | 1.73207 | 2.28825  | 0.02825 | yes |
| XLOC_004167 | XLOC_004167 | H3f3b    | chr11:115883274-115885818 | AAdko-FF-TTep | AAwt-FF-TTep | OK | 20.8256  | 104.731 | 2.33026 | 2.63729  | 0.0108  | yes |
| XLOC_004178 | XLOC_004178 | Foxj1    | chr11:116192016-116196668 | AAdko-FF-TTep | AAwt-FF-TTep | OK | 38.737   | 152.829 | 1.98013 | 2.01969  | 0.0493  | yes |
| XLOC_004369 | XLOC_004369 | Adi1     | chr12:29360071-29367039   | AAdko-FF-TTep | AAwt-FF-TTep | OK | 2.32894  | 14.9373 | 2.68118 | 3.13983  | 0.00585 | yes |
| XLOC_004423 | XLOC_004423 | PsmA6    | chr12:56499811-56519446   | AAdko-FF-TTep | AAwt-FF-TTep | OK | 5.76852  | 28.7024 | 2.3149  | 2.8792   | 0.0097  | yes |
| XLOC_004449 | XLOC_004449 | Atp5s    | chr12:70825948-70846900   | AAdko-FF-TTep | AAwt-FF-TTep | OK | 0.440564 | 12.1661 | 4.78737 | 0.955231 | 0.00905 | yes |
| XLOC_004458 | XLOC_004458 | PsmA3    | chr12:72075609-72116810   | AAdko-FF-TTep | AAwt-FF-TTep | OK | 1.80917  | 15.5516 | 3.10367 | 3.40517  | 0.00345 | yes |
| XLOC_004484 | XLOC_004484 | Hspa2    | chr12:77505162-77507923   | AAdko-FF-TTep | AAwt-FF-TTep | OK | 2.10675  | 13.7864 | 2.71015 | 3.2588   | 0.00325 | yes |
| XLOC_004502 | XLOC_004502 | Slc39a9  | chr12:81745201-81784329   | AAdko-FF-TTep | AAwt-FF-TTep | OK | 2.31241  | 12.3556 | 2.41769 | 3.20758  | 0.00245 | yes |
| XLOC_004553 | XLOC_004553 | Ahsa1    | chr12:88607677-88614902   | AAdko-FF-TTep | AAwt-FF-TTep | OK | 6.32523  | 31.3103 | 2.30745 | 2.94149  | 0.008   | yes |
| XLOC_004571 | XLOC_004571 | Zc3h14   | chr12:99985028-100139694  | AAdko-FF-TTep | AAwt-FF-TTep | OK | 1.82041  | 12.0769 | 2.72991 | 2.79816  | 0.0045  | yes |
| XLOC_004578 | XLOC_004578 | Calm1    | chr12:101437750-101448016 | AAdko-FF-TTep | AAwt-FF-TTep | OK | 8.79538  | 70.8739 | 3.01044 | 3.25793  | 0.00385 | yes |
| XLOC_004707 | XLOC_004707 | Eif5     | chr12:112776311-112784964 | AAdko-FF-TTep | AAwt-FF-TTep | OK | 4.02652  | 21.5183 | 2.41795 | 3.15063  | 0.00385 | yes |

|             |             |                    |                           |               |              |    |          |         |         |         |         |     |
|-------------|-------------|--------------------|---------------------------|---------------|--------------|----|----------|---------|---------|---------|---------|-----|
| XLOC_004779 | XLOC_004779 | 2410004P03Rik      | chr12:17011763-17018533   | AAdko-FF-TTep | AAwt-FF-TTep | OK | 4.82994  | 34.5523 | 2.8387  | 3.51596 | 0.0022  | yes |
| XLOC_004810 | XLOC_004810 | Hbp1               | chr12:32339733-32635400   | AAdko-FF-TTep | AAwt-FF-TTep | OK | 2.1729   | 12.9417 | 2.57433 | 2.99388 | 0.0103  | yes |
| XLOC_004814 | XLOC_004814 | Cdhr3              | chr12:33718565-33777741   | AAdko-FF-TTep | AAwt-FF-TTep | OK | 0.465553 | 24.0911 | 5.69341 | 1.92977 | 0.01035 | yes |
| XLOC_004830 | XLOC_004830 | Dnajb9             | chr12:45306883-45311055   | AAdko-FF-TTep | AAwt-FF-TTep | OK | 5.33121  | 29.7436 | 2.48004 | 3.34383 | 0.0018  | yes |
| XLOC_004879 | XLOC_004879 | Cdkl1              | chr12:70847786-71087989   | AAdko-FF-TTep | AAwt-FF-TTep | OK | 6.39045  | 40.0545 | 2.64798 | 2.56447 | 0.01785 | yes |
| XLOC_004913 | XLOC_004913 | Atp6v1d            | chr12:79943968-79962625   | AAdko-FF-TTep | AAwt-FF-TTep | OK | 4.15291  | 14.4551 | 1.79938 | 2.16831 | 0.0467  | yes |
| XLOC_004917 | XLOC_004917 | Vti1b              | chr12:80231774-80273445   | AAdko-FF-TTep | AAwt-FF-TTep | OK | 1.60744  | 12.7177 | 2.98401 | 2.8945  | 0.0194  | yes |
| XLOC_004922 | XLOC_004922 | Actn1              | chr12:81268528-81361358   | AAdko-FF-TTep | AAwt-FF-TTep | OK | 3.70819  | 21.6182 | 2.54346 | 3.34018 | 0.00165 | yes |
| XLOC_004983 | XLOC_004983 | Gtf2a1             | chr12:92793701-92828927   | AAdko-FF-TTep | AAwt-FF-TTep | OK | 2.21436  | 12.9604 | 2.54914 | 3.38358 | 0.002   | yes |
| XLOC_005031 | XLOC_005031 | Clmn               | chr12:106001323-106103347 | AAdko-FF-TTep | AAwt-FF-TTep | OK | 2.60034  | 12.9487 | 2.31604 | 2.81022 | 0.00835 | yes |
| XLOC_005053 | XLOC_005053 | Hsp90aa1           | chr12:111929245-111934605 | AAdko-FF-TTep | AAwt-FF-TTep | OK | 4.70614  | 45.7403 | 3.28085 | 4.04992 | 0.0006  | yes |
| XLOC_005060 | XLOC_005060 | Ckb                | chr12:112907565-112910549 | AAdko-FF-TTep | AAwt-FF-TTep | OK | 1.77058  | 42.4248 | 4.58261 | 4.0296  | 0.03405 | yes |
| XLOC_005109 | XLOC_005109 | Gdi2               | chr13:3537320-3610354     | AAdko-FF-TTep | AAwt-FF-TTep | OK | 5.69842  | 27.0521 | 2.24711 | 2.47157 | 0.02245 | yes |
| XLOC_005137 | XLOC_005137 | Psma2              | chr13:14705508-14717940   | AAdko-FF-TTep | AAwt-FF-TTep | OK | 5.54219  | 21.9858 | 1.98804 | 2.33664 | 0.03565 | yes |
| XLOC_005195 | XLOC_005195 | Hist1h1d           | chr13:23646900-23650518   | AAdko-FF-TTep | AAwt-FF-TTep | OK | 2.13057  | 14.6543 | 2.78202 | 3.64333 | 0.00285 | yes |
| XLOC_005201 | XLOC_005201 | Hist1h2bc          | chr13:23776067-23784349   | AAdko-FF-TTep | AAwt-FF-TTep | OK | 8.31598  | 39.8972 | 2.26233 | 2.75922 | 0.01275 | yes |
| XLOC_005257 | XLOC_005257 | Bphl               | chr13:34129509-34165943   | AAdko-FF-TTep | AAwt-FF-TTep | OK | 7.04773  | 26.2066 | 1.8947  | 2.36272 | 0.02895 | yes |
| XLOC_005297 | XLOC_005297 | Rnf144b            | chr13:47218088-47343360   | AAdko-FF-TTep | AAwt-FF-TTep | OK | 3.31405  | 15.2562 | 2.20273 | 2.94657 | 0.0056  | yes |
| XLOC_005428 | XLOC_005428 | Cetn3              | chr13:81922290-81936156   | AAdko-FF-TTep | AAwt-FF-TTep | OK | 3.29281  | 15.2118 | 2.2078  | 2.43937 | 0.02975 | yes |
| XLOC_005443 | XLOC_005443 | Serinc5            | chr13:93381092-93481901   | AAdko-FF-TTep | AAwt-FF-TTep | OK | 4.68329  | 15.459  | 1.72285 | 2.29351 | 0.03025 | yes |
| XLOC_005452 | XLOC_005452 | Tbca               | chr13:95558897-95612854   | AAdko-FF-TTep | AAwt-FF-TTep | OK | 5.43585  | 34.0236 | 2.64596 | 2.64891 | 0.0252  | yes |
| XLOC_005521 | XLOC_005521 | Net1               | chr13:3881808-3917466     | AAdko-FF-TTep | AAwt-FF-TTep | OK | 2.76576  | 15.743  | 2.50897 | 3.24269 | 0.0036  | yes |
| XLOC_005615 | XLOC_005615 | Hist1h1e,Hist1h2bc | chr13:23674632-23714427   | AAdko-FF-TTep | AAwt-FF-TTep | OK | 9.30287  | 48.341  | 2.3775  | 3.08267 | 0.0036  | yes |
| XLOC_005661 | XLOC_005661 | Serpinb6a          | chr13:34009786-34094663   | AAdko-FF-TTep | AAwt-FF-TTep | OK | 4.21197  | 20.7495 | 2.30051 | 2.62329 | 0.0126  | yes |
| XLOC_005707 | XLOC_005707 | Fam120a            | chr13:48974585-49063197   | AAdko-FF-TTep | AAwt-FF-TTep | OK | 7.25821  | 29.2164 | 2.00909 | 2.4046  | 0.02165 | yes |
| XLOC_005731 | XLOC_005731 | 4833439L19Rik      | chr13:54605165-54666743   | AAdko-FF-TTep | AAwt-FF-TTep | OK | 3.96696  | 13.0692 | 1.72006 | 2.14296 | 0.0313  | yes |
| XLOC_005761 | XLOC_005761 | Ubqln1             | chr13:58277516-58317014   | AAdko-FF-TTep | AAwt-FF-TTep | OK | 3.0824   | 12.8738 | 2.06231 | 2.79091 | 0.00995 | yes |
| XLOC_005765 | XLOC_005765 | Hnrnpk             | chr13:58493311-58512510   | AAdko-FF-TTep | AAwt-FF-TTep | OK | 6.8478   | 24.06   | 1.81292 | 2.21658 | 0.03525 | yes |
| XLOC_005775 | XLOC_005775 | Isca1              | chr13:59856775-59871150   | AAdko-FF-TTep | AAwt-FF-TTep | OK | 3.44297  | 16.2394 | 2.23777 | 2.6583  | 0.0168  | yes |
| XLOC_005816 | XLOC_005816 | Uqcrb              | chr13:67001556-67006286   | AAdko-FF-TTep | AAwt-FF-TTep | OK | 2.95542  | 31.2608 | 3.40292 | 2.76409 | 0.04415 | yes |
| XLOC_005860 | XLOC_005860 | Sdha               | chr13:74459702-74487688   | AAdko-FF-TTep | AAwt-FF-TTep | OK | 3.624    | 13.2935 | 1.87507 | 2.43518 | 0.02505 | yes |
| XLOC_005914 | XLOC_005914 | Btf3               | chr13:99079851-99086961   | AAdko-FF-TTep | AAwt-FF-TTep | OK | 10.1278  | 71.9511 | 2.8287  | 3.77822 | 0.0004  | yes |
| XLOC_006039 | XLOC_006039 | Pxk                | chr14:8930726-8997625     | AAdko-FF-TTep | AAwt-FF-TTep | OK | 2.2847   | 11.8498 | 2.37479 | 2.97479 | 0.0059  | yes |
| XLOC_006046 | XLOC_006046 | Sntn               | chr14:14503389-14515662   | AAdko-FF-TTep | AAwt-FF-TTep | OK | 1.44772  | 37.6912 | 4.70237 | 5.18951 | 0.0026  | yes |
| XLOC_006064 | XLOC_006064 | Vcl                | chr14:21748654-21852895   | AAdko-FF-TTep | AAwt-FF-TTep | OK | 3.83152  | 11.6402 | 1.60313 | 2.11361 | 0.042   | yes |
| XLOC_006068 | XLOC_006068 | Vdac2              | chr14:22650782-22668132   | AAdko-FF-TTep | AAwt-FF-TTep | OK | 6.00967  | 30.9381 | 2.36403 | 3.14916 | 0.00235 | yes |
| XLOC_006076 | XLOC_006076 | Anxa11             | chr14:26661640-26706290   | AAdko-FF-TTep | AAwt-FF-TTep | OK | 2.29117  | 13.7677 | 2.58714 | 2.94836 | 0.012   | yes |
| XLOC_006124 | XLOC_006124 | Ncoa4              | chr14:32973077-32992549   | AAdko-FF-TTep | AAwt-FF-TTep | OK | 2.59373  | 12.9962 | 2.32499 | 3.10023 | 0.0037  | yes |
| XLOC_006145 | XLOC_006145 | Anxa8              | chr14:34864315-34915940   | AAdko-FF-TTep | AAwt-FF-TTep | OK | 4.37107  | 42.309  | 3.27491 | 4.27976 | 0.0002  | yes |
| XLOC_006291 | XLOC_006291 | Kcnrg              | chr14:62217062-62301210   | AAdko-FF-TTep | AAwt-FF-TTep | OK | 0.94882  | 17.297  | 4.18824 | 3.48698 | 0.03835 | yes |
| XLOC_006331 | XLOC_006331 | Stc1               | chr14:69647345-69659458   | AAdko-FF-TTep | AAwt-FF-TTep | OK | 4.22086  | 18.4936 | 2.13142 | 2.8226  | 0.0088  | yes |
| XLOC_006358 | XLOC_006358 | Esd                | chr14:75132151-75150250   | AAdko-FF-TTep | AAwt-FF-TTep | OK | 1.81257  | 12.9108 | 2.83247 | 2.95941 | 0.0147  | yes |
| XLOC_006370 | XLOC_006370 | Tsc22d1            | chr14:76814603-76907573   | AAdko-FF-TTep | AAwt-FF-TTep | OK | 11.9783  | 34.2272 | 1.51472 | 1.97028 | 0.04495 | yes |

|             |             |               |                           |               |              |    |          |         |          |          |         |     |
|-------------|-------------|---------------|---------------------------|---------------|--------------|----|----------|---------|----------|----------|---------|-----|
| XLOC_006380 | XLOC_006380 | Sugt1         | chr14:79987497-80031123   | AAdko-FF-TTep | AAwt-FF-TTep | OK | 0.965535 | 13.0296 | 3.75432  | 3.90178  | 0.0061  | yes |
| XLOC_006392 | XLOC_006392 | Klf5          | chr14:99697909-99713843   | AAdko-FF-TTep | AAwt-FF-TTep | OK | 2.94273  | 12.4401 | 2.07977  | 2.52449  | 0.02025 | yes |
| XLOC_006426 | XLOC_006426 | Tm9sf2        | chr14:122506303-122558825 | AAdko-FF-TTep | AAwt-FF-TTep | OK | 6.19853  | 28.9846 | 2.22529  | 2.86412  | 0.00505 | yes |
| XLOC_006457 | XLOC_006457 | Rpl15         | chr14:19100336-19103500   | AAdko-FF-TTep | AAwt-FF-TTep | OK | 9.75595  | 36.599  | 1.90745  | 2.52145  | 0.0184  | yes |
| XLOC_006461 | XLOC_006461 | 2700060E02Rik | chr14:20570478-20643045   | AAdko-FF-TTep | AAwt-FF-TTep | OK | 3.43835  | 13.4869 | 1.97177  | 2.39157  | 0.02555 | yes |
| XLOC_006529 | XLOC_006529 | Zfp488        | chr14:34780255-34791950   | AAdko-FF-TTep | AAwt-FF-TTep | OK | 2.29327  | 14.3041 | 2.64095  | 3.42001  | 0.0027  | yes |
| XLOC_006545 | XLOC_006545 | Ghitm         | chr14:37933631-37948508   | AAdko-FF-TTep | AAwt-FF-TTep | OK | 4.08119  | 15.4756 | 1.92293  | 2.57192  | 0.01685 | yes |
| XLOC_006549 | XLOC_006549 | Fam213a       | chr14:41807012-41827064   | AAdko-FF-TTep | AAwt-FF-TTep | OK | 2.81292  | 29.7028 | 3.40046  | 4.34612  | 0.0005  | yes |
| XLOC_006699 | XLOC_006699 | Efha1         | chr14:58535116-58618099   | AAdko-FF-TTep | AAwt-FF-TTep | OK | 3.59348  | 12.5163 | 1.80035  | 2.3071   | 0.0289  | yes |
| XLOC_006749 | XLOC_006749 | Bnip3l        | chr14:67604076-67627714   | AAdko-FF-TTep | AAwt-FF-TTep | OK | 4.36905  | 16.1068 | 1.88228  | 2.51404  | 0.01565 | yes |
| XLOC_006801 | XLOC_006801 | Fam216b       | chr14:78480830-78488814   | AAdko-FF-TTep | AAwt-FF-TTep | OK | 1.2206   | 24.233  | 4.31131  | 5.25443  | 0.0002  | yes |
| XLOC_006901 | XLOC_006901 | Sepp1         | chr15:3220766-3230508     | AAdko-FF-TTep | AAwt-FF-TTep | OK | 8.67339  | 46.5552 | 2.42427  | 2.98298  | 0.00535 | yes |
| XLOC_006903 | XLOC_006903 | Oxct1         | chr15:3970110-4105344     | AAdko-FF-TTep | AAwt-FF-TTep | OK | 4.55043  | 18.8318 | 2.0491   | 2.67129  | 0.01095 | yes |
| XLOC_006925 | XLOC_006925 | Capsl         | chr15:9365782-9395790     | AAdko-FF-TTep | AAwt-FF-TTep | OK | 6.20764  | 45.9721 | 2.88864  | 3.71954  | 0.0017  | yes |
| XLOC_006940 | XLOC_006940 | Golph3        | chr15:12251250-12281022   | AAdko-FF-TTep | AAwt-FF-TTep | OK | 6.93848  | 35.5342 | 2.35652  | 3.05137  | 0.0047  | yes |
| XLOC_006948 | XLOC_006948 | Fam134b       | chr15:25773018-25903442   | AAdko-FF-TTep | AAwt-FF-TTep | OK | 1.66599  | 15.5453 | 3.22203  | 3.64165  | 0.0019  | yes |
| XLOC_006953 | XLOC_006953 | Dnahc5        | chr15:28133520-28401800   | AAdko-FF-TTep | AAwt-FF-TTep | OK | 0.521381 | 29.9773 | 5.84539  | 5.92041  | 0.00005 | yes |
| XLOC_006977 | XLOC_006977 | Atp6v1c1      | chr15:38591658-38622199   | AAdko-FF-TTep | AAwt-FF-TTep | OK | 8.1935   | 42.6527 | 2.38008  | 3.16802  | 0.0038  | yes |
| XLOC_006979 | XLOC_006979 | Fzd6          | chr15:38837825-38869736   | AAdko-FF-TTep | AAwt-FF-TTep | OK | 2.24874  | 12.8595 | 2.51565  | 3.23936  | 0.00255 | yes |
| XLOC_007058 | XLOC_007058 | Maf1          | chr15:76181723-76184808   | AAdko-FF-TTep | AAwt-FF-TTep | OK | 2.79373  | 13.747  | 2.29886  | 2.24685  | 0.03555 | yes |
| XLOC_007094 | XLOC_007094 | Eif3l         | chr15:78905652-78924830   | AAdko-FF-TTep | AAwt-FF-TTep | OK | 3.04766  | 14.7991 | 2.27973  | 2.84223  | 0.01005 | yes |
| XLOC_007106 | XLOC_007106 | Syng1         | chr15:79921763-79949931   | AAdko-FF-TTep | AAwt-FF-TTep | OK | 30.0057  | 2.64934 | -3.50153 | -2.60762 | 0.007   | yes |
| XLOC_007124 | XLOC_007124 | Tef           | chr15:81633102-81657293   | AAdko-FF-TTep | AAwt-FF-TTep | OK | 5.84888  | 21.8213 | 1.89951  | 2.50084  | 0.01765 | yes |
| XLOC_007125 | XLOC_007125 | Aco2          | chr15:81702892-81756643   | AAdko-FF-TTep | AAwt-FF-TTep | OK | 6.78963  | 27.6382 | 2.02526  | 2.49094  | 0.01785 | yes |
| XLOC_007158 | XLOC_007158 | Atxn10        | chr15:85166810-85294266   | AAdko-FF-TTep | AAwt-FF-TTep | OK | 3.38005  | 15.0765 | 2.15718  | 2.79731  | 0.0103  | yes |
| XLOC_007255 | XLOC_007255 | Eif4b         | chr15:101904203-101927604 | AAdko-FF-TTep | AAwt-FF-TTep | OK | 4.16554  | 14.29   | 1.77843  | 2.39732  | 0.0163  | yes |
| XLOC_007280 | XLOC_007280 | Hnrnpa1       | chr15:103070862-103075386 | AAdko-FF-TTep | AAwt-FF-TTep | OK | 3.86802  | 16.0028 | 2.04866  | 2.3708   | 0.0231  | yes |
| XLOC_007281 | XLOC_007281 | Copz1         | chr15:103103348-103130295 | AAdko-FF-TTep | AAwt-FF-TTep | OK | 14.0427  | 41.6223 | 1.56754  | 2.07922  | 0.0428  | yes |
| XLOC_007326 | XLOC_007326 | Cct5          | chr15:31520638-31531559   | AAdko-FF-TTep | AAwt-FF-TTep | OK | 9.18992  | 28.8767 | 1.65178  | 2.21102  | 0.0321  | yes |
| XLOC_007341 | XLOC_007341 | Rgs22         | chr15:35938150-36070215   | AAdko-FF-TTep | AAwt-FF-TTep | OK | 0.580125 | 14.2874 | 4.62224  | 5.4043   | 0.00055 | yes |
| XLOC_007346 | XLOC_007346 | Pabpc1        | chr15:36525412-36538728   | AAdko-FF-TTep | AAwt-FF-TTep | OK | 7.90202  | 37.9905 | 2.26535  | 2.88996  | 0.006   | yes |
| XLOC_007347 | XLOC_007347 | Ywhaz         | chr15:36700015-36726684   | AAdko-FF-TTep | AAwt-FF-TTep | OK | 4.30518  | 18.1209 | 2.07351  | 2.74534  | 0.0085  | yes |
| XLOC_007349 | XLOC_007349 | Ncald         | chr15:37295929-37722183   | AAdko-FF-TTep | AAwt-FF-TTep | OK | 8.6157   | 41.2686 | 2.26001  | 2.70125  | 0.0127  | yes |
| XLOC_007354 | XLOC_007354 | Azin1         | chr15:38417184-38449021   | AAdko-FF-TTep | AAwt-FF-TTep | OK | 2.00182  | 17.6292 | 3.13858  | 4.23981  | 0.0005  | yes |
| XLOC_007363 | XLOC_007363 | Eif3e         | chr15:43081585-43114282   | AAdko-FF-TTep | AAwt-FF-TTep | OK | 2.39336  | 17.7292 | 2.88901  | 3.53129  | 0.00325 | yes |
| XLOC_007374 | XLOC_007374 | Eif3h         | chr15:51618108-51697007   | AAdko-FF-TTep | AAwt-FF-TTep | OK | 4.94927  | 21.7557 | 2.1361   | 2.6898   | 0.01435 | yes |
| XLOC_007379 | XLOC_007379 | Enpp2         | chr15:54670452-54751701   | AAdko-FF-TTep | AAwt-FF-TTep | OK | 2.86259  | 20.9623 | 2.8724   | 3.84743  | 0.0008  | yes |
| XLOC_007463 | XLOC_007463 | Puff60        | chr15:75900611-75911376   | AAdko-FF-TTep | AAwt-FF-TTep | OK | 7.82799  | 24.826  | 1.66514  | 2.0925   | 0.04105 | yes |
| XLOC_007478 | XLOC_007478 | Slc39a4       | chr15:76442812-76447282   | AAdko-FF-TTep | AAwt-FF-TTep | OK | 1.92593  | 22.9807 | 3.57679  | 3.47954  | 0.0161  | yes |
| XLOC_007485 | XLOC_007485 | Arhgap39      | chr15:76554414-76648600   | AAdko-FF-TTep | AAwt-FF-TTep | OK | 1.88441  | 14.4005 | 2.93394  | 3.54662  | 0.0014  | yes |
| XLOC_007546 | XLOC_007546 | St13          | chr15:81193916-81230226   | AAdko-FF-TTep | AAwt-FF-TTep | OK | 4.29337  | 24.0793 | 2.48761  | 3.10655  | 0.00385 | yes |
| XLOC_007555 | XLOC_007555 | Nhp2l1        | chr15:81871774-81878028   | AAdko-FF-TTep | AAwt-FF-TTep | OK | 3.32701  | 14.1787 | 2.09142  | 2.29468  | 0.03435 | yes |
| XLOC_007617 | XLOC_007617 | Rabl2         | chr15:89412957-89422354   | AAdko-FF-TTep | AAwt-FF-TTep | OK | 3.67538  | 20.5847 | 2.48561  | 3.01578  | 0.0089  | yes |



|             |             |               |                         |               |              |    |          |         |         |         |         |     |
|-------------|-------------|---------------|-------------------------|---------------|--------------|----|----------|---------|---------|---------|---------|-----|
| XLOC_007676 | XLOC_007676 | Tuba1b        | chr15:98761861-98764821 | AAdko-FF-TTep | AAwt-FF-TTep | OK | 23.8532  | 76.6665 | 1.68441 | 2.19615 | 0.0372  | yes |
| XLOC_007677 | XLOC_007677 | Tuba1a        | chr15:98780277-98783932 | AAdko-FF-TTep | AAwt-FF-TTep | OK | 43.017   | 174.978 | 2.02419 | 2.18503 | 0.0408  | yes |
| XLOC_007868 | XLOC_007868 | Efcab1        | chr16:14906736-14926159 | AAdko-FF-TTep | AAwt-FF-TTep | OK | 0.641641 | 16.1599 | 4.65451 | 4.37039 | 0.0034  | yes |
| XLOC_007871 | XLOC_007871 | Mkp2          | chr16:16213437-16272805 | AAdko-FF-TTep | AAwt-FF-TTep | OK | 3.58055  | 12.1673 | 1.76476 | 2.34273 | 0.0229  | yes |
| XLOC_007875 | XLOC_007875 | Mapk1         | chr16:16983474-17047546 | AAdko-FF-TTep | AAwt-FF-TTep | OK | 2.7554   | 12.5861 | 2.1915  | 2.8273  | 0.00865 | yes |
| XLOC_007916 | XLOC_007916 | Psmc2         | chr16:20651724-20663487 | AAdko-FF-TTep | AAwt-FF-TTep | OK | 5.41398  | 17.3277 | 1.67832 | 2.18437 | 0.0347  | yes |
| XLOC_007932 | XLOC_007932 | Eif4a2        | chr16:23107551-23127803 | AAdko-FF-TTep | AAwt-FF-TTep | OK | 15.6077  | 86.2488 | 2.46624 | 2.41605 | 0.0169  | yes |
| XLOC_007952 | XLOC_007952 | Hes1          | chr16:30065442-30067882 | AAdko-FF-TTep | AAwt-FF-TTep | OK | 7.20243  | 23.725  | 1.71985 | 2.20342 | 0.03435 | yes |
| XLOC_008008 | XLOC_008008 | Lrrc58        | chr16:37868485-37888943 | AAdko-FF-TTep | AAwt-FF-TTep | OK | 2.8939   | 15.5689 | 2.42758 | 3.08185 | 0.00325 | yes |
| XLOC_008011 | XLOC_008011 | Gsk3b         | chr16:38085149-38246165 | AAdko-FF-TTep | AAwt-FF-TTep | OK | 2.57568  | 11.6442 | 2.17658 | 2.77042 | 0.00965 | yes |
| XLOC_008016 | XLOC_008016 | B4galt4       | chr16:38742376-38769158 | AAdko-FF-TTep | AAwt-FF-TTep | OK | 2.00198  | 11.9422 | 2.57657 | 3.23419 | 0.0054  | yes |
| XLOC_008027 | XLOC_008027 | Wdr52         | chr16:44394911-44482541 | AAdko-FF-TTep | AAwt-FF-TTep | OK | 1.5281   | 16.5338 | 3.4356  | 3.01666 | 0.0062  | yes |
| XLOC_008052 | XLOC_008052 | Rpl24         | chr16:55966387-55971550 | AAdko-FF-TTep | AAwt-FF-TTep | OK | 33.3751  | 110.402 | 1.72593 | 2.28421 | 0.02925 | yes |
| XLOC_008117 | XLOC_008117 | Il10rb        | chr16:91406479-91426079 | AAdko-FF-TTep | AAwt-FF-TTep | OK | 3.37299  | 11.7382 | 1.79912 | 2.15508 | 0.04265 | yes |
| XLOC_008140 | XLOC_008140 | Ets2          | chr16:95924013-95942656 | AAdko-FF-TTep | AAwt-FF-TTep | OK | 5.71846  | 21.5657 | 1.91504 | 2.54233 | 0.0184  | yes |
| XLOC_008167 | XLOC_008167 | Rogdi         | chr16:5008821-5013646   | AAdko-FF-TTep | AAwt-FF-TTep | OK | 5.81872  | 22.6391 | 1.96005 | 2.28432 | 0.0343  | yes |
| XLOC_008168 | XLOC_008168 | Glyr1         | chr16:5013994-5050003   | AAdko-FF-TTep | AAwt-FF-TTep | OK | 4.12694  | 15.0337 | 1.86505 | 2.47079 | 0.01725 | yes |
| XLOC_008178 | XLOC_008178 | Emp2          | chr16:10281841-10314061 | AAdko-FF-TTep | AAwt-FF-TTep | OK | 4.58842  | 14.6005 | 1.66995 | 2.24313 | 0.02695 | yes |
| XLOC_008197 | XLOC_008197 | Pdxdc1        | chr16:13819369-13903228 | AAdko-FF-TTep | AAwt-FF-TTep | OK | 5.96832  | 23.9544 | 2.00489 | 2.38325 | 0.02635 | yes |
| XLOC_008210 | XLOC_008210 | Spag6         | chr16:16751887-16829459 | AAdko-FF-TTep | AAwt-FF-TTep | OK | 0.694281 | 16.3158 | 4.55461 | 5.12572 | 0.0011  | yes |
| XLOC_008223 | XLOC_008223 | 4930451C15Rik | chr16:17543255-17561343 | AAdko-FF-TTep | AAwt-FF-TTep | OK | 1.08914  | 21.7998 | 4.32306 | 4.60468 | 0.0004  | yes |
| XLOC_008238 | XLOC_008238 | Comt          | chr16:18348274-18479166 | AAdko-FF-TTep | AAwt-FF-TTep | OK | 2.56328  | 16.0947 | 2.65052 | 2.83011 | 0.0112  | yes |
| XLOC_008290 | XLOC_008290 | Atp13a5       | chr16:29230978-29378818 | AAdko-FF-TTep | AAwt-FF-TTep | OK | 5.36295  | 16.548  | 1.62556 | 2.14635 | 0.03255 | yes |
| XLOC_008316 | XLOC_008316 | Iqcg          | chr16:32914185-33056272 | AAdko-FF-TTep | AAwt-FF-TTep | OK | 0.702713 | 15.5095 | 4.46407 | 5.07742 | 0.00055 | yes |
| XLOC_008464 | XLOC_008464 | Cct8          | chr16:87455229-87496114 | AAdko-FF-TTep | AAwt-FF-TTep | OK | 2.3613   | 14.2532 | 2.59363 | 2.6681  | 0.01935 | yes |
| XLOC_008501 | XLOC_008501 | Tmem50b       | chr16:91574752-91597925 | AAdko-FF-TTep | AAwt-FF-TTep | OK | 5.10646  | 15.8733 | 1.63621 | 2.08294 | 0.0468  | yes |
| XLOC_008608 | XLOC_008608 | Prr18         | chr17:8533209-8538483   | AAdko-FF-TTep | AAwt-FF-TTep | OK | 3.14198  | 18.0582 | 2.52291 | 3.23256 | 0.0029  | yes |
| XLOC_008710 | XLOC_008710 | Dcpp3         | chr17:24054424-24056408 | AAdko-FF-TTep | AAwt-FF-TTep | OK | 16.2684  | 68.95   | 2.08348 | 2.68224 | 0.01295 | yes |
| XLOC_008748 | XLOC_008748 | Tekt4         | chr17:25608534-25613539 | AAdko-FF-TTep | AAwt-FF-TTep | OK | 2.5318   | 11.6931 | 2.20742 | 2.31829 | 0.04185 | yes |
| XLOC_008797 | XLOC_008797 | Srsf3         | chr17:29169604-29180317 | AAdko-FF-TTep | AAwt-FF-TTep | OK | 4.15753  | 24.3719 | 2.55142 | 2.86074 | 0.01    | yes |
| XLOC_008982 | XLOC_008982 | Enpp5         | chr17:44215794-44223510 | AAdko-FF-TTep | AAwt-FF-TTep | OK | 4.50608  | 14.7482 | 1.71059 | 2.29857 | 0.0267  | yes |
| XLOC_009128 | XLOC_009128 | Epas1         | chr17:87153203-87232750 | AAdko-FF-TTep | AAwt-FF-TTep | OK | 2.56094  | 12.2429 | 2.25721 | 3.02168 | 0.00435 | yes |
| XLOC_009150 | XLOC_009150 | 4930470H14Rik | chr17:4044657-4082995   | AAdko-FF-TTep | AAwt-FF-TTep | OK | 7.21873  | 23.555  | 1.70622 | 2.16475 | 0.04015 | yes |
| XLOC_009161 | XLOC_009161 | Ezr           | chr17:6942479-6987129   | AAdko-FF-TTep | AAwt-FF-TTep | OK | 6.16291  | 23.9369 | 1.95755 | 2.59518 | 0.0112  | yes |
| XLOC_009208 | XLOC_009208 | Psemb1        | chr17:15612684-15635240 | AAdko-FF-TTep | AAwt-FF-TTep | OK | 6.85166  | 26.0072 | 1.92439 | 2.25932 | 0.0409  | yes |
| XLOC_009211 | XLOC_009211 | Rgmb          | chr17:15941623-15966139 | AAdko-FF-TTep | AAwt-FF-TTep | OK | 2.72372  | 12.4704 | 2.19485 | 2.38418 | 0.0189  | yes |
| XLOC_009285 | XLOC_009285 | Hn1l          | chr17:25079414-25097568 | AAdko-FF-TTep | AAwt-FF-TTep | OK | 4.14633  | 13.7678 | 1.73139 | 2.23069 | 0.03475 | yes |
| XLOC_009309 | XLOC_009309 | Pigq          | chr17:26063368-26078907 | AAdko-FF-TTep | AAwt-FF-TTep | OK | 4.22309  | 15.3805 | 1.86473 | 2.3554  | 0.026   | yes |
| XLOC_009329 | XLOC_009329 | Rps10         | chr17:27767373-27772187 | AAdko-FF-TTep | AAwt-FF-TTep | OK | 43.6653  | 130.708 | 1.58179 | 2.10241 | 0.0433  | yes |
| XLOC_009358 | XLOC_009358 | Rsph1         | chr17:31391964-31414301 | AAdko-FF-TTep | AAwt-FF-TTep | OK | 3.15135  | 25.1402 | 2.99596 | 3.51561 | 0.00415 | yes |
| XLOC_009446 | XLOC_009446 | Tubb5         | chr17:35970864-35975246 | AAdko-FF-TTep | AAwt-FF-TTep | OK | 10.8055  | 34.8742 | 1.6904  | 2.18387 | 0.03665 | yes |
| XLOC_009527 | XLOC_009527 | Hsp90ab1      | chr17:45704726-45710210 | AAdko-FF-TTep | AAwt-FF-TTep | OK | 27.9603  | 135.73  | 2.27929 | 2.24676 | 0.02885 | yes |
| XLOC_009606 | XLOC_009606 | Vmac          | chr17:56853354-56857122 | AAdko-FF-TTep | AAwt-FF-TTep | OK | 4.44745  | 16.5472 | 1.89554 | 2.31682 | 0.0314  | yes |

|             |             |               |                         |               |              |    |          |         |         |         |         |     |
|-------------|-------------|---------------|-------------------------|---------------|--------------|----|----------|---------|---------|---------|---------|-----|
| XLOC_009632 | XLOC_009632 | Vapa          | chr17:65929392-65962895 | AAdko-FF-TTep | AAwt-FF-TTep | OK | 6.73394  | 29.8686 | 2.14911 | 2.88152 | 0.00555 | yes |
| XLOC_009638 | XLOC_009638 | Ndufv2        | chr17:66428134-66450831 | AAdko-FF-TTep | AAwt-FF-TTep | OK | 2.11873  | 12.6228 | 2.57476 | 2.89684 | 0.013   | yes |
| XLOC_009677 | XLOC_009677 | Hnrpll        | chr17:80428826-80461674 | AAdko-FF-TTep | AAwt-FF-TTep | OK | 2.33036  | 13.7996 | 2.566   | 2.90009 | 0.00915 | yes |
| XLOC_009759 | XLOC_009759 | Wac           | chr18:7868855-7929025   | AAdko-FF-TTep | AAwt-FF-TTep | OK | 0.969344 | 11.6768 | 3.5905  | 4.57091 | 0.00035 | yes |
| XLOC_009800 | XLOC_009800 | Galnt1        | chr18:24363844-24445317 | AAdko-FF-TTep | AAwt-FF-TTep | OK | 2.94291  | 14.2915 | 2.27984 | 3.09307 | 0.00565 | yes |
| XLOC_009836 | XLOC_009836 | Matr3         | chr18:35721811-35751699 | AAdko-FF-TTep | AAwt-FF-TTep | OK | 2.21982  | 15.1967 | 2.77524 | 3.69018 | 0.00135 | yes |
| XLOC_009839 | XLOC_009839 | Ube2d2a       | chr18:35931212-35966826 | AAdko-FF-TTep | AAwt-FF-TTep | OK | 2.92865  | 15.1553 | 2.37151 | 3.07816 | 0.0055  | yes |
| XLOC_009922 | XLOC_009922 | Zfp474        | chr18:52775568-52799484 | AAdko-FF-TTep | AAwt-FF-TTep | OK | 2.16973  | 12.16   | 2.48655 | 2.78218 | 0.01645 | yes |
| XLOC_009961 | XLOC_009961 | Csnk1a1       | chr18:61714895-61749719 | AAdko-FF-TTep | AAwt-FF-TTep | OK | 4.9575   | 38.9142 | 2.97261 | 3.72976 | 0.0007  | yes |
| XLOC_010033 | XLOC_010033 | Cyb5          | chr18:85020805-85049255 | AAdko-FF-TTep | AAwt-FF-TTep | OK | 5.61781  | 28.0647 | 2.32068 | 2.55715 | 0.0277  | yes |
| XLOC_010107 | XLOC_010107 | Nme5          | chr18:34722290-34738760 | AAdko-FF-TTep | AAwt-FF-TTep | OK | 1.93719  | 22.336  | 3.52733 | 3.53114 | 0.00625 | yes |
| XLOC_010117 | XLOC_010117 | Slc23a1       | chr18:35758320-35789784 | AAdko-FF-TTep | AAwt-FF-TTep | OK | 0.740536 | 11.6844 | 3.97987 | 3.46776 | 0.0165  | yes |
| XLOC_010170 | XLOC_010170 | Tmed7         | chr18:46745581-46757189 | AAdko-FF-TTep | AAwt-FF-TTep | OK | 2.33356  | 15.9567 | 2.77356 | 3.73229 | 0.00065 | yes |
| XLOC_010222 | XLOC_010222 | Lman1         | chr18:66140392-66162353 | AAdko-FF-TTep | AAwt-FF-TTep | OK | 2.15213  | 11.923  | 2.46991 | 3.1355  | 0.0037  | yes |
| XLOC_010242 | XLOC_010242 | Smad4         | chr18:73798666-73863395 | AAdko-FF-TTep | AAwt-FF-TTep | OK | 2.40733  | 12.7534 | 2.40537 | 3.14446 | 0.0037  | yes |
| XLOC_010423 | XLOC_010423 | Ddb1          | chr19:10680114-10704311 | AAdko-FF-TTep | AAwt-FF-TTep | OK | 3.88865  | 13.4147 | 1.78647 | 2.39522 | 0.02065 | yes |
| XLOC_010489 | XLOC_010489 | Rfk           | chr19:17468532-17475839 | AAdko-FF-TTep | AAwt-FF-TTep | OK | 1.50014  | 19.4773 | 3.69862 | 4.47997 | 0.0005  | yes |
| XLOC_010497 | XLOC_010497 | Zfand5        | chr19:21346609-21361330 | AAdko-FF-TTep | AAwt-FF-TTep | OK | 2.54895  | 15.3343 | 2.58879 | 2.26432 | 0.02995 | yes |
| XLOC_010525 | XLOC_010525 | Jak2          | chr19:29326317-29387570 | AAdko-FF-TTep | AAwt-FF-TTep | OK | 1.58912  | 12.7107 | 2.99973 | 4.03242 | 0.0002  | yes |
| XLOC_010554 | XLOC_010554 | Tnks2         | chr19:36908721-36967967 | AAdko-FF-TTep | AAwt-FF-TTep | OK | 2.43411  | 15.3883 | 2.66037 | 3.55698 | 0.0012  | yes |
| XLOC_010655 | XLOC_010655 | Pdcd4         | chr19:53966720-54107768 | AAdko-FF-TTep | AAwt-FF-TTep | OK | 3.99729  | 21.0707 | 2.39814 | 2.24111 | 0.03575 | yes |
| XLOC_010681 | XLOC_010681 | Eno4          | chr19:59017914-59045911 | AAdko-FF-TTep | AAwt-FF-TTep | OK | 1.29833  | 12.7412 | 3.29477 | 3.42464 | 0.01065 | yes |
| XLOC_010686 | XLOC_010686 | E330013P04Rik | chr19:60220521-60238494 | AAdko-FF-TTep | AAwt-FF-TTep | OK | 1.02272  | 16.1617 | 3.9821  | 4.79737 | 0.0002  | yes |
| XLOC_010779 | XLOC_010779 | Stip1         | chr19:7095185-7114516   | AAdko-FF-TTep | AAwt-FF-TTep | OK | 3.02698  | 25.6008 | 3.08024 | 4.02305 | 0.0005  | yes |
| XLOC_010786 | XLOC_010786 | Rtn3          | chr19:7492114-7557781   | AAdko-FF-TTep | AAwt-FF-TTep | OK | 6.80603  | 39.532  | 2.53814 | 3.01637 | 0.00435 | yes |
| XLOC_010813 | XLOC_010813 | Ppp1r32       | chr19:10548746-10557387 | AAdko-FF-TTep | AAwt-FF-TTep | OK | 2.16927  | 23.608  | 3.444   | 3.61275 | 0.00925 | yes |
| XLOC_010882 | XLOC_010882 | Anxa1         | chr19:20447923-20465161 | AAdko-FF-TTep | AAwt-FF-TTep | OK | 17.2814  | 62.534  | 1.85542 | 2.41183 | 0.01935 | yes |
| XLOC_010906 | XLOC_010906 | Ak3           | chr19:29095321-29123219 | AAdko-FF-TTep | AAwt-FF-TTep | OK | 4.43215  | 18.3693 | 2.05122 | 2.67559 | 0.0089  | yes |
| XLOC_010956 | XLOC_010956 | Tctn3         | chr19:40668120-40686727 | AAdko-FF-TTep | AAwt-FF-TTep | OK | 6.25546  | 24.8216 | 1.98841 | 2.3937  | 0.0187  | yes |
| XLOC_010960 | XLOC_010960 | Tm9sf3        | chr19:41285331-41338494 | AAdko-FF-TTep | AAwt-FF-TTep | OK | 4.41909  | 20.1554 | 2.18934 | 2.7264  | 0.0115  | yes |
| XLOC_010974 | XLOC_010974 | Pyroxd2       | chr19:42800347-42827265 | AAdko-FF-TTep | AAwt-FF-TTep | OK | 4.45576  | 17.6653 | 1.98718 | 2.60331 | 0.01515 | yes |
| XLOC_011054 | XLOC_011054 | Prdx3         | chr19:60939968-60950441 | AAdko-FF-TTep | AAwt-FF-TTep | OK | 4.32917  | 17.5695 | 2.02091 | 2.26586 | 0.0366  | yes |
| XLOC_011089 | XLOC_011089 | Fam107b       | chr2:3630729-3699413    | AAdko-FF-TTep | AAwt-FF-TTep | OK | 4.03974  | 21.2534 | 2.39536 | 3.24498 | 0.00265 | yes |
| XLOC_011100 | XLOC_011100 | Usp6nl        | chr2:6243802-6364866    | AAdko-FF-TTep | AAwt-FF-TTep | OK | 0.907307 | 12.0198 | 3.72768 | 4.00505 | 0.00045 | yes |
| XLOC_011154 | XLOC_011154 | Vim           | chr2:13495937-13504453  | AAdko-FF-TTep | AAwt-FF-TTep | OK | 18.6676  | 70.2556 | 1.91208 | 2.43671 | 0.01905 | yes |
| XLOC_011238 | XLOC_011238 | Cacfd1        | chr2:26865445-26876609  | AAdko-FF-TTep | AAwt-FF-TTep | OK | 2.56449  | 12.401  | 2.27371 | 1.81087 | 0.0434  | yes |
| XLOC_011250 | XLOC_011250 | Ak8           | chr2:28555680-28668685  | AAdko-FF-TTep | AAwt-FF-TTep | OK | 1.36701  | 14.9987 | 3.45575 | 2.97096 | 0.0438  | yes |
| XLOC_011264 | XLOC_011264 | Sptan1        | chr2:29821079-29886970  | AAdko-FF-TTep | AAwt-FF-TTep | OK | 2.88835  | 12.7321 | 2.14015 | 2.76543 | 0.00855 | yes |
| XLOC_011265 | XLOC_011265 | Set           | chr2:29917515-29928097  | AAdko-FF-TTep | AAwt-FF-TTep | OK | 1.83832  | 12.6698 | 2.78494 | 3.44829 | 0.00325 | yes |
| XLOC_011268 | XLOC_011268 | Endog         | chr2:30018131-30033979  | AAdko-FF-TTep | AAwt-FF-TTep | OK | 1.4044   | 15.8645 | 3.49778 | 2.25492 | 0.0078  | yes |
| XLOC_011299 | XLOC_011299 | Fam102a       | chr2:32390878-32425270  | AAdko-FF-TTep | AAwt-FF-TTep | OK | 2.30249  | 12.1147 | 2.39549 | 3.0156  | 0.00655 | yes |
| XLOC_011316 | XLOC_011316 | Hspa5         | chr2:34627609-34632049  | AAdko-FF-TTep | AAwt-FF-TTep | OK | 16.5014  | 67.9187 | 2.04122 | 2.14899 | 0.04325 | yes |
| XLOC_011319 | XLOC_011319 | Gsn           | chr2:35111878-35163422  | AAdko-FF-TTep | AAwt-FF-TTep | OK | 13.4319  | 48.3737 | 1.84856 | 2.33672 | 0.02485 | yes |

|             |             |               |                          |               |              |    |         |         |         |         |         |     |
|-------------|-------------|---------------|--------------------------|---------------|--------------|----|---------|---------|---------|---------|---------|-----|
| XLOC_011424 | XLOC_011424 | Itga6         | chr2:71625000-71696441   | AAdko-FF-TTep | AAwt-FF-TTep | OK | 2.49963 | 17.7405 | 2.82726 | 3.71269 | 0.0006  | yes |
| XLOC_011444 | XLOC_011444 | Hnrnpa3       | chr2:75497315-75507464   | AAdko-FF-TTep | AAwt-FF-TTep | OK | 5.00549 | 28.2465 | 2.49649 | 2.90577 | 0.0082  | yes |
| XLOC_011463 | XLOC_011463 | Itgav         | chr2:83564553-83647073   | AAdko-FF-TTep | AAwt-FF-TTep | OK | 3.46292 | 15.2014 | 2.13415 | 2.67422 | 0.01245 | yes |
| XLOC_011622 | XLOC_011622 | Lgr4          | chr2:109757803-109854414 | AAdko-FF-TTep | AAwt-FF-TTep | OK | 4.53748 | 20.2272 | 2.15633 | 2.80458 | 0.00765 | yes |
| XLOC_011710 | XLOC_011710 | B2m           | chr2:121945843-122011925 | AAdko-FF-TTep | AAwt-FF-TTep | OK | 4.33564 | 25.891  | 2.57813 | 3.04084 | 0.0088  | yes |
| XLOC_011781 | XLOC_011781 | Prnp          | chr2:131735663-131764167 | AAdko-FF-TTep | AAwt-FF-TTep | OK | 9.9456  | 40.0972 | 2.01137 | 2.66564 | 0.0095  | yes |
| XLOC_011807 | XLOC_011807 | Dstn          | chr2:143741066-143769060 | AAdko-FF-TTep | AAwt-FF-TTep | OK | 13.3443 | 50.4109 | 1.91751 | 2.49067 | 0.01265 | yes |
| XLOC_011814 | XLOC_011814 | Sec23b        | chr2:144381964-144416489 | AAdko-FF-TTep | AAwt-FF-TTep | OK | 7.16411 | 25.5607 | 1.83507 | 2.46574 | 0.0147  | yes |
| XLOC_011851 | XLOC_011851 | Pygb          | chr2:150612531-150657484 | AAdko-FF-TTep | AAwt-FF-TTep | OK | 8.59465 | 34.3782 | 1.99998 | 2.45992 | 0.01955 | yes |
| XLOC_011865 | XLOC_011865 | Csnk2a1       | chr2:152052575-152107587 | AAdko-FF-TTep | AAwt-FF-TTep | OK | 3.4373  | 14.1223 | 2.03862 | 2.72116 | 0.0103  | yes |
| XLOC_011868 | XLOC_011868 | 6820408C15Rik | chr2:152241322-152270064 | AAdko-FF-TTep | AAwt-FF-TTep | OK | 0       | 14.1252 | Inf     | NA      | 0.00005 | yes |
| XLOC_011884 | XLOC_011884 | Tm9sf4        | chr2:152987036-153036199 | AAdko-FF-TTep | AAwt-FF-TTep | OK | 3.20767 | 13.9428 | 2.11992 | 2.78065 | 0.009   | yes |
| XLOC_011909 | XLOC_011909 | Raly          | chr2:154616845-154692997 | AAdko-FF-TTep | AAwt-FF-TTep | OK | 4.92286 | 19.4995 | 1.98587 | 2.27386 | 0.02575 | yes |
| XLOC_011944 | XLOC_011944 | Shhg11        | chr2:158201373-158211881 | AAdko-FF-TTep | AAwt-FF-TTep | OK | 4.40356 | 13.4841 | 1.61452 | 2.05998 | 0.0464  | yes |
| XLOC_011960 | XLOC_011960 | Srsf6         | chr2:162757243-162762856 | AAdko-FF-TTep | AAwt-FF-TTep | OK | 4.60495 | 16.817  | 1.86866 | 2.46266 | 0.0196  | yes |
| XLOC_011963 | XLOC_011963 | lft52         | chr2:162843207-162871871 | AAdko-FF-TTep | AAwt-FF-TTep | OK | 2.46688 | 13.3895 | 2.44034 | 3.01691 | 0.0071  | yes |
| XLOC_011983 | XLOC_011983 | Dbndd2        | chr2:164311639-164318823 | AAdko-FF-TTep | AAwt-FF-TTep | OK | 5.1851  | 22.104  | 2.09186 | 2.68325 | 0.01315 | yes |
| XLOC_011984 | XLOC_011984 | Pigt          | chr2:164323024-164333801 | AAdko-FF-TTep | AAwt-FF-TTep | OK | 16.2611 | 52.5884 | 1.69332 | 2.19629 | 0.03055 | yes |
| XLOC_012070 | XLOC_012070 | Lsm14b        | chr2:179759691-179770166 | AAdko-FF-TTep | AAwt-FF-TTep | OK | 1.75912 | 12.9599 | 2.88113 | 3.16753 | 0.01255 | yes |
| XLOC_012127 | XLOC_012127 | Atp5c1        | chr2:9977658-10002137    | AAdko-FF-TTep | AAwt-FF-TTep | OK | 8.98844 | 27.1439 | 1.59448 | 2.05134 | 0.04705 | yes |
| XLOC_012153 | XLOC_012153 | Enkur         | chr2:21102357-21126992   | AAdko-FF-TTep | AAwt-FF-TTep | OK | 1.82833 | 15.8357 | 3.11458 | 3.54084 | 0.0033  | yes |
| XLOC_012159 | XLOC_012159 | Pax8          | chr2:24276079-24331086   | AAdko-FF-TTep | AAwt-FF-TTep | OK | 10.5465 | 39.6612 | 1.91096 | 2.31287 | 0.0273  | yes |
| XLOC_012168 | XLOC_012168 | Tubb4b        | chr2:25074264-25080222   | AAdko-FF-TTep | AAwt-FF-TTep | OK | 30.2615 | 136.692 | 2.17538 | 2.55934 | 0.0137  | yes |
| XLOC_012199 | XLOC_012199 | 4932418E24Rik | chr2:26127166-26155710   | AAdko-FF-TTep | AAwt-FF-TTep | OK | 2.53474 | 23.205  | 3.19453 | 3.72161 | 0.0018  | yes |
| XLOC_012224 | XLOC_012224 | 1700007K13Rik | chr2:28317520-28321854   | AAdko-FF-TTep | AAwt-FF-TTep | OK | 5.54326 | 38.3007 | 2.78856 | 3.30961 | 0.0044  | yes |
| XLOC_012231 | XLOC_012231 | 1700101E01Rik | chr2:28782473-28910586   | AAdko-FF-TTep | AAwt-FF-TTep | OK | 1.4336  | 19.9196 | 3.79648 | 2.83869 | 0.011   | yes |
| XLOC_012249 | XLOC_012249 | BC005624      | chr2:30828352-30837461   | AAdko-FF-TTep | AAwt-FF-TTep | OK | 3.21382 | 19.5816 | 2.60714 | 3.04968 | 0.0066  | yes |
| XLOC_012256 | XLOC_012256 | Swi5          | chr2:32134335-32143588   | AAdko-FF-TTep | AAwt-FF-TTep | OK | 10.7562 | 37.4688 | 1.80052 | 2.31452 | 0.0302  | yes |
| XLOC_012286 | XLOC_012286 | Rab14         | chr2:35035724-35056640   | AAdko-FF-TTep | AAwt-FF-TTep | OK | 2.38599 | 14.0733 | 2.5603  | 3.38348 | 0.0024  | yes |
| XLOC_012394 | XLOC_012394 | Nfe2l2        | chr2:75513575-75542698   | AAdko-FF-TTep | AAwt-FF-TTep | OK | 7.80734 | 29.558  | 1.92064 | 2.49927 | 0.0203  | yes |
| XLOC_012395 | XLOC_012395 | Ttc30b        | chr2:75773906-75776519   | AAdko-FF-TTep | AAwt-FF-TTep | OK | 3.37153 | 19.7508 | 2.55044 | 3.3408  | 0.00235 | yes |
| XLOC_012411 | XLOC_012411 | Nckap1        | chr2:80340679-80421381   | AAdko-FF-TTep | AAwt-FF-TTep | OK | 2.35652 | 13.0402 | 2.46824 | 3.34185 | 0.00215 | yes |
| XLOC_012435 | XLOC_012435 | 4833423E24Rik | chr2:85324248-85359092   | AAdko-FF-TTep | AAwt-FF-TTep | OK | 3.78672 | 18.0637 | 2.25407 | 2.86159 | 0.01025 | yes |
| XLOC_012618 | XLOC_012618 | Ehf           | chr2:103103589-103143353 | AAdko-FF-TTep | AAwt-FF-TTep | OK | 7.08945 | 31.2611 | 2.14062 | 2.43349 | 0.02435 | yes |
| XLOC_012622 | XLOC_012622 | Caprin1       | chr2:103602904-103638039 | AAdko-FF-TTep | AAwt-FF-TTep | OK | 2.53193 | 14.9981 | 2.56647 | 3.30492 | 0.00365 | yes |
| XLOC_012633 | XLOC_012633 | Rcn1          | chr2:105226104-105239476 | AAdko-FF-TTep | AAwt-FF-TTep | OK | 15.4089 | 51.2233 | 1.73303 | 2.07401 | 0.0413  | yes |
| XLOC_012643 | XLOC_012643 | Bbox1         | chr2:110105239-110145882 | AAdko-FF-TTep | AAwt-FF-TTep | OK | 1.06154 | 15.2344 | 3.8431  | 3.64083 | 0.01275 | yes |
| XLOC_012750 | XLOC_012750 | Hdc           | chr2:126419403-126444401 | AAdko-FF-TTep | AAwt-FF-TTep | OK | 21.9584 | 81.8765 | 1.89868 | 2.24922 | 0.03275 | yes |
| XLOC_012795 | XLOC_012795 | Spef1         | chr2:130995996-131000743 | AAdko-FF-TTep | AAwt-FF-TTep | OK | 1.53889 | 12.7714 | 3.05295 | 2.56853 | 0.03145 | yes |
| XLOC_012806 | XLOC_012806 | Gpcpd1        | chr2:132354818-132403984 | AAdko-FF-TTep | AAwt-FF-TTep | OK | 1.93243 | 13.5159 | 2.80618 | 3.69883 | 0.0012  | yes |
| XLOC_012909 | XLOC_012909 | Rbm39         | chr2:155972974-156005976 | AAdko-FF-TTep | AAwt-FF-TTep | OK | 7.54978 | 49.5709 | 2.71499 | 3.36959 | 0.0019  | yes |
| XLOC_012911 | XLOC_012911 | 2900097C17Rik | chr2:156213798-156218715 | AAdko-FF-TTep | AAwt-FF-TTep | OK | 5.01089 | 21.7742 | 2.11948 | 2.69546 | 0.01245 | yes |
| XLOC_012941 | XLOC_012941 | Serinc3       | chr2:163449008-163471536 | AAdko-FF-TTep | AAwt-FF-TTep | OK | 5.76642 | 20.4911 | 1.82925 | 2.41651 | 0.01535 | yes |

|             |             |               |                          |               |              |    |          |         |          |          |         |     |
|-------------|-------------|---------------|--------------------------|---------------|--------------|----|----------|---------|----------|----------|---------|-----|
| XLOC_012955 | XLOC_012955 | Sdc4          | chr2:164249746-164268688 | AAdko-FF-TTep | AAwt-FF-TTep | OK | 4.23695  | 16.5606 | 1.96666  | 2.4604   | 0.0231  | yes |
| XLOC_012982 | XLOC_012982 | Sulf2         | chr2:165899398-165981183 | AAdko-FF-TTep | AAwt-FF-TTep | OK | 3.94386  | 15.1231 | 1.93908  | 2.59063  | 0.0138  | yes |
| XLOC_013125 | XLOC_013125 | Zc2hc1a       | chr3:7503425-7554992     | AAdko-FF-TTep | AAwt-FF-TTep | OK | 1.73488  | 18.0279 | 3.37732  | 4.54515  | 0.00065 | yes |
| XLOC_013205 | XLOC_013205 | Hspa4l        | chr3:40549272-40597866   | AAdko-FF-TTep | AAwt-FF-TTep | OK | 0.901334 | 19.8248 | 4.4591   | 5.25667  | 0.00005 | yes |
| XLOC_013240 | XLOC_013240 | 2810407C02Rik | chr3:58380579-58397466   | AAdko-FF-TTep | AAwt-FF-TTep | OK | 2.5069   | 17.2935 | 2.78625  | 3.74824  | 0.00045 | yes |
| XLOC_013263 | XLOC_013263 | Mlf1          | chr3:67178018-67203922   | AAdko-FF-TTep | AAwt-FF-TTep | OK | 3.65155  | 28.9423 | 2.9866   | 3.60215  | 0.00305 | yes |
| XLOC_013321 | XLOC_013321 | Cct3          | chr3:88101056-88125688   | AAdko-FF-TTep | AAwt-FF-TTep | OK | 2.97057  | 19.634  | 2.72454  | 3.42041  | 0.00285 | yes |
| XLOC_013353 | XLOC_013353 | 1700094D03Rik | chr3:89866717-89872269   | AAdko-FF-TTep | AAwt-FF-TTep | OK | 1.6481   | 17.975  | 3.44712  | 4.49323  | 0.0007  | yes |
| XLOC_013366 | XLOC_013366 | S100a16       | chr3:90341176-90347073   | AAdko-FF-TTep | AAwt-FF-TTep | OK | 9.46742  | 35.9366 | 1.92441  | 2.44791  | 0.0238  | yes |
| XLOC_013430 | XLOC_013430 | Golph3l       | chr3:95392855-95423234   | AAdko-FF-TTep | AAwt-FF-TTep | OK | 2.49391  | 11.8814 | 2.25223  | 2.85297  | 0.0074  | yes |
| XLOC_013447 | XLOC_013447 | Hist2h2bb     | chr3:96073622-96074115   | AAdko-FF-TTep | AAwt-FF-TTep | OK | 0        | 13.6481 | Inf      | NA       | 0.03025 | yes |
| XLOC_013561 | XLOC_013561 | 1810037I17Rik | chr3:122627314-122629112 | AAdko-FF-TTep | AAwt-FF-TTep | OK | 2.38656  | 14.2009 | 2.57298  | 2.44844  | 0.03995 | yes |
| XLOC_013582 | XLOC_013582 | Pla2g12a      | chr3:129581539-129603121 | AAdko-FF-TTep | AAwt-FF-TTep | OK | 3.88266  | 14.2896 | 1.87985  | 2.11752  | 0.04395 | yes |
| XLOC_013599 | XLOC_013599 | Ube2d3        | chr3:135099186-135131129 | AAdko-FF-TTep | AAwt-FF-TTep | OK | 2.28625  | 26.4243 | 3.53081  | 4.67326  | 0.0001  | yes |
| XLOC_013626 | XLOC_013626 | Gtf2b         | chr3:142428210-142446569 | AAdko-FF-TTep | AAwt-FF-TTep | OK | 1.83851  | 12.9295 | 2.81405  | 2.89259  | 0.0158  | yes |
| XLOC_013677 | XLOC_013677 | Tpd52         | chr3:8929435-9004515     | AAdko-FF-TTep | AAwt-FF-TTep | OK | 2.85813  | 17.1657 | 2.58638  | 3.31084  | 0.00225 | yes |
| XLOC_013713 | XLOC_013713 | Mecom         | chr3:29850217-30408639   | AAdko-FF-TTep | AAwt-FF-TTep | OK | 1.04314  | 12.8276 | 3.62025  | 1.8025   | 0.01925 | yes |
| XLOC_013774 | XLOC_013774 | Tm4sf1        | chr3:57090985-57105930   | AAdko-FF-TTep | AAwt-FF-TTep | OK | 3.46817  | 74.2378 | 4.41991  | 5.45854  | 0.00005 | yes |
| XLOC_013780 | XLOC_013780 | Serp1         | chr3:58325892-58361423   | AAdko-FF-TTep | AAwt-FF-TTep | OK | 2.83346  | 13.5304 | 2.25557  | 2.3293   | 0.0329  | yes |
| XLOC_013805 | XLOC_013805 | Ssr3          | chr3:65183578-65196475   | AAdko-FF-TTep | AAwt-FF-TTep | OK | 9.81651  | 42.1465 | 2.10213  | 2.62546  | 0.01285 | yes |
| XLOC_013912 | XLOC_013912 | Creb3l4       | chr3:90040743-90047434   | AAdko-FF-TTep | AAwt-FF-TTep | OK | 2.96885  | 17.5572 | 2.56409  | 3.08515  | 0.0066  | yes |
| XLOC_014030 | XLOC_014030 | Olfml3        | chr3:103539316-103541924 | AAdko-FF-TTep | AAwt-FF-TTep | OK | 24.7094  | 4.4214  | -2.48248 | -2.40047 | 0.0437  | yes |
| XLOC_014031 | XLOC_014031 | Hipk1         | chr3:103543737-103595474 | AAdko-FF-TTep | AAwt-FF-TTep | OK | 8.95026  | 54.5363 | 2.60722  | 2.35767  | 0.0191  | yes |
| XLOC_014046 | XLOC_014046 | Pifo          | chr3:105799874-105817564 | AAdko-FF-TTep | AAwt-FF-TTep | OK | 3.60818  | 38.0628 | 3.39904  | 3.83117  | 0.002   | yes |
| XLOC_014061 | XLOC_014061 | Ahcyl1        | chr3:107466037-107499466 | AAdko-FF-TTep | AAwt-FF-TTep | OK | 4.12941  | 13.6767 | 1.72772  | 2.31463  | 0.02885 | yes |
| XLOC_014079 | XLOC_014079 | 5330417C22Rik | chr3:108258623-108339440 | AAdko-FF-TTep | AAwt-FF-TTep | OK | 3.85981  | 12.7506 | 1.72396  | 2.10502  | 0.03655 | yes |
| XLOC_014101 | XLOC_014101 | Cdc14a        | chr3:115975470-116126950 | AAdko-FF-TTep | AAwt-FF-TTep | OK | 0.715327 | 14.0487 | 4.29569  | 5.37622  | 0.0001  | yes |
| XLOC_014172 | XLOC_014172 | Pdlim5        | chr3:141902548-142058660 | AAdko-FF-TTep | AAwt-FF-TTep | OK | 2.87064  | 14.7203 | 2.35836  | 3.03848  | 0.0007  | yes |
| XLOC_014347 | XLOC_014347 | Sdcbp         | chr4:6292826-6323269     | AAdko-FF-TTep | AAwt-FF-TTep | OK | 8.70858  | 38.6798 | 2.15107  | 2.83358  | 0.00675 | yes |
| XLOC_014349 | XLOC_014349 | Rab2a         | chr4:8462790-8534849     | AAdko-FF-TTep | AAwt-FF-TTep | OK | 3.98851  | 22.2308 | 2.47864  | 3.30224  | 0.003   | yes |
| XLOC_014356 | XLOC_014356 | Trp53inp1     | chr4:11083587-11101524   | AAdko-FF-TTep | AAwt-FF-TTep | OK | 2.59495  | 14.9948 | 2.53068  | 3.37579  | 0.00155 | yes |
| XLOC_014369 | XLOC_014369 | Tmem64        | chr4:15192966-15213900   | AAdko-FF-TTep | AAwt-FF-TTep | OK | 2.63676  | 14.0275 | 2.41142  | 3.24771  | 0.00155 | yes |
| XLOC_014370 | XLOC_014370 | Calb1         | chr4:15808410-15833856   | AAdko-FF-TTep | AAwt-FF-TTep | OK | 3.2513   | 23.9794 | 2.88271  | 3.8184   | 0.00065 | yes |
| XLOC_014413 | XLOC_014413 | Chmp5         | chr4:40895585-40912335   | AAdko-FF-TTep | AAwt-FF-TTep | OK | 3.58008  | 15.2813 | 2.0937   | 2.5229   | 0.0217  | yes |
| XLOC_014518 | XLOC_014518 | Slc31a1       | chr4:62021734-62052803   | AAdko-FF-TTep | AAwt-FF-TTep | OK | 2.72573  | 13.3642 | 2.29366  | 3.06606  | 0.00315 | yes |
| XLOC_014581 | XLOC_014581 | Ift74         | chr4:94281210-94359924   | AAdko-FF-TTep | AAwt-FF-TTep | OK | 0.262298 | 19.0624 | 6.18338  | 5.98215  | 0.0139  | yes |
| XLOC_014625 | XLOC_014625 | Ssbp3         | chr4:106584074-106722299 | AAdko-FF-TTep | AAwt-FF-TTep | OK | 5.01621  | 23.8697 | 2.25051  | 2.89334  | 0.0043  | yes |
| XLOC_014628 | XLOC_014628 | Tmem59        | chr4:106851234-106873601 | AAdko-FF-TTep | AAwt-FF-TTep | OK | 11.9034  | 37.3159 | 1.64842  | 2.18007  | 0.0352  | yes |
| XLOC_014651 | XLOC_014651 | Ttc39a        | chr4:109079704-109117350 | AAdko-FF-TTep | AAwt-FF-TTep | OK | 2.11877  | 18.2149 | 3.10382  | 3.78685  | 0.0021  | yes |
| XLOC_014689 | XLOC_014689 | Prdx1         | chr4:116357569-116372605 | AAdko-FF-TTep | AAwt-FF-TTep | OK | 21.4753  | 92.2352 | 2.10264  | 2.62613  | 0.0112  | yes |
| XLOC_014740 | XLOC_014740 | Mycbp         | chr4:123582255-123590364 | AAdko-FF-TTep | AAwt-FF-TTep | OK | 1.82637  | 12.4932 | 2.77409  | 3.15226  | 0.0098  | yes |
| XLOC_014759 | XLOC_014759 | Oscp1         | chr4:125735808-125767411 | AAdko-FF-TTep | AAwt-FF-TTep | OK | 2.80813  | 13.0916 | 2.22095  | 2.70072  | 0.0157  | yes |
| XLOC_014788 | XLOC_014788 | Ptp4a2        | chr4:129497722-129527247 | AAdko-FF-TTep | AAwt-FF-TTep | OK | 2.35104  | 12.8636 | 2.45193  | 3.24066  | 0.0028  | yes |

|             |             |               |                          |               |              |    |          |         |         |         |         |     |
|-------------|-------------|---------------|--------------------------|---------------|--------------|----|----------|---------|---------|---------|---------|-----|
| XLOC_014844 | XLOC_014844 | Srsf10        | chr4:135412006-135425814 | AAdko-FF-TTep | AAwt-FF-TTep | OK | 0.95135  | 16.2654 | 4.09569 | 4.98404 | 0.00065 | yes |
| XLOC_014885 | XLOC_014885 | Rcc2          | chr4:140257387-140279135 | AAdko-FF-TTep | AAwt-FF-TTep | OK | 3.10605  | 16.0248 | 2.36715 | 2.66131 | 0.01385 | yes |
| XLOC_014989 | XLOC_014989 | 2010015L04Rik | chr4:154783298-154817219 | AAdko-FF-TTep | AAwt-FF-TTep | OK | 3.32834  | 16.6063 | 2.31886 | 2.89613 | 0.0077  | yes |
| XLOC_014995 | XLOC_014995 | Nadk          | chr4:154936500-154965110 | AAdko-FF-TTep | AAwt-FF-TTep | OK | 2.84781  | 11.8767 | 2.06022 | 2.46533 | 0.0244  | yes |
| XLOC_015026 | XLOC_015026 | Penk          | chr4:4060682-4065961     | AAdko-FF-TTep | AAwt-FF-TTep | OK | 2.29676  | 15.6321 | 2.76684 | 2.72886 | 0.02065 | yes |
| XLOC_015070 | XLOC_015070 | Pnrc1         | chr4:33332397-33335762   | AAdko-FF-TTep | AAwt-FF-TTep | OK | 6.66579  | 23.9329 | 1.84415 | 2.44385 | 0.01845 | yes |
| XLOC_015091 | XLOC_015091 | B4galt1       | chr4:40751614-40801570   | AAdko-FF-TTep | AAwt-FF-TTep | OK | 6.32363  | 19.5454 | 1.62801 | 2.17213 | 0.03345 | yes |
| XLOC_015101 | XLOC_015101 | 1110017D15Rik | chr4:41452041-41464366   | AAdko-FF-TTep | AAwt-FF-TTep | OK | 6.65936  | 32.7489 | 2.29799 | 1.74347 | 0.0395  | yes |
| XLOC_015119 | XLOC_015119 | Vcp           | chr4:42992835-43013379   | AAdko-FF-TTep | AAwt-FF-TTep | OK | 11.5748  | 36.7359 | 1.66621 | 2.05637 | 0.0438  | yes |
| XLOC_015133 | XLOC_015133 | Spag8         | chr4:43664200-43666424   | AAdko-FF-TTep | AAwt-FF-TTep | OK | 2.54973  | 17.7686 | 2.80091 | 2.54858 | 0.0318  | yes |
| XLOC_015189 | XLOC_015189 | Epb4.1l4b     | chr4:57074597-57156028   | AAdko-FF-TTep | AAwt-FF-TTep | OK | 4.46205  | 18.6529 | 2.06362 | 2.7712  | 0.00645 | yes |
| XLOC_015202 | XLOC_015202 | Ptbp3         | chr4:59484739-59562236   | AAdko-FF-TTep | AAwt-FF-TTep | OK | 3.21472  | 13.4339 | 2.06311 | 2.6757  | 0.01    | yes |
| XLOC_015228 | XLOC_015228 | Alad          | chr4:62165808-62181097   | AAdko-FF-TTep | AAwt-FF-TTep | OK | 3.95834  | 13.7613 | 1.79765 | 2.4252  | 0.0228  | yes |
| XLOC_015267 | XLOC_015267 | Rps6          | chr4:86500002-86503271   | AAdko-FF-TTep | AAwt-FF-TTep | OK | 41.9489  | 178.952 | 2.09287 | 2.22237 | 0.0322  | yes |
| XLOC_015281 | XLOC_015281 | Klh9          | chr4:88364195-88368412   | AAdko-FF-TTep | AAwt-FF-TTep | OK | 3.02438  | 12.3311 | 2.02758 | 2.71189 | 0.00995 | yes |
| XLOC_015317 | XLOC_015317 | Wdr78         | chr4:102710669-102786989 | AAdko-FF-TTep | AAwt-FF-TTep | OK | 0.574661 | 13.271  | 4.52942 | 4.3927  | 0.0069  | yes |
| XLOC_015335 | XLOC_015335 | Scp2          | chr4:107716434-107791152 | AAdko-FF-TTep | AAwt-FF-TTep | OK | 5.49903  | 18.4166 | 1.74376 | 2.32181 | 0.0228  | yes |
| XLOC_015397 | XLOC_015397 | Ptprf         | chr4:117880817-117964002 | AAdko-FF-TTep | AAwt-FF-TTep | OK | 3.39566  | 13.2861 | 1.96816 | 2.58454 | 0.0127  | yes |
| XLOC_015417 | XLOC_015417 | Ccdc30        | chr4:118995497-119088126 | AAdko-FF-TTep | AAwt-FF-TTep | OK | 0.959336 | 14.6341 | 3.93116 | 1.45523 | 0.0249  | yes |
| XLOC_015453 | XLOC_015453 | Dnali1        | chr4:124707257-124742901 | AAdko-FF-TTep | AAwt-FF-TTep | OK | 5.0523   | 34.0432 | 2.75235 | 3.18988 | 0.0034  | yes |
| XLOC_015512 | XLOC_015512 | Snhg3         | chr4:131907847-131909601 | AAdko-FF-TTep | AAwt-FF-TTep | OK | 55.1886  | 200.179 | 1.85885 | 2.24184 | 0.026   | yes |
| XLOC_015528 | XLOC_015528 | Nudc          | chr4:133088456-133101942 | AAdko-FF-TTep | AAwt-FF-TTep | OK | 8.49537  | 31.9945 | 1.91308 | 2.51786 | 0.01685 | yes |
| XLOC_015534 | XLOC_015534 | Hmg2          | chr4:133520653-133523906 | AAdko-FF-TTep | AAwt-FF-TTep | OK | 13.6863  | 45.9957 | 1.74877 | 2.30975 | 0.032   | yes |
| XLOC_015560 | XLOC_015560 | Pnrc2         | chr4:135426840-135429761 | AAdko-FF-TTep | AAwt-FF-TTep | OK | 2.65128  | 13.1313 | 2.30825 | 2.87156 | 0.01    | yes |
| XLOC_015573 | XLOC_015573 | Cdc42         | chr4:136875610-136913674 | AAdko-FF-TTep | AAwt-FF-TTep | OK | 10.2373  | 39.3217 | 1.94149 | 2.57264 | 0.014   | yes |
| XLOC_015582 | XLOC_015582 | Ubxn10        | chr4:138274440-138281166 | AAdko-FF-TTep | AAwt-FF-TTep | OK | 4.04817  | 32.824  | 3.01941 | 3.88052 | 0.00115 | yes |
| XLOC_015620 | XLOC_015620 | Kazn          | chr4:141658304-141795363 | AAdko-FF-TTep | AAwt-FF-TTep | OK | 2.35105  | 20.4142 | 3.1182  | 3.18385 | 0.00135 | yes |
| XLOC_015622 | XLOC_015622 | Pdpn          | chr4:142857324-142889410 | AAdko-FF-TTep | AAwt-FF-TTep | OK | 9.75755  | 39.7819 | 2.02752 | 2.69015 | 0.00885 | yes |
| XLOC_015720 | XLOC_015720 | Ttll10        | chr4:155406047-155424926 | AAdko-FF-TTep | AAwt-FF-TTep | OK | 3.20388  | 16.3874 | 2.3547  | 2.79084 | 0.01435 | yes |
| XLOC_015799 | XLOC_015799 | Sri           | chr5:8046079-8069245     | AAdko-FF-TTep | AAwt-FF-TTep | OK | 1.13084  | 12.3642 | 3.4507  | 3.89225 | 0.00265 | yes |
| XLOC_015828 | XLOC_015828 | Fgl2          | chr5:20798666-20930495   | AAdko-FF-TTep | AAwt-FF-TTep | OK | 12.3965  | 69.2163 | 2.48118 | 2.27867 | 0.03435 | yes |
| XLOC_015874 | XLOC_015874 | Ccdc164       | chr5:30607913-30668993   | AAdko-FF-TTep | AAwt-FF-TTep | OK | 0.997821 | 13.1811 | 3.72355 | 4.11644 | 0.004   | yes |
| XLOC_015880 | XLOC_015880 | Mapre3        | chr5:31116657-31168479   | AAdko-FF-TTep | AAwt-FF-TTep | OK | 1.61827  | 13.1625 | 3.02391 | 3.38827 | 0.00485 | yes |
| XLOC_015908 | XLOC_015908 | Maea          | chr5:33678220-33715943   | AAdko-FF-TTep | AAwt-FF-TTep | OK | 4.70637  | 16.055  | 1.77034 | 2.23648 | 0.0379  | yes |
| XLOC_015955 | XLOC_015955 | Lap3          | chr5:45884612-45903930   | AAdko-FF-TTep | AAwt-FF-TTep | OK | 3.71392  | 14.706  | 1.98538 | 2.12979 | 0.019   | yes |
| XLOC_015983 | XLOC_015983 | Klf3          | chr5:65194391-65222819   | AAdko-FF-TTep | AAwt-FF-TTep | OK | 4.70266  | 16.1219 | 1.77747 | 2.20681 | 0.03295 | yes |
| XLOC_016009 | XLOC_016009 | Ociad1        | chr5:73684032-73705316   | AAdko-FF-TTep | AAwt-FF-TTep | OK | 3.506    | 20.9665 | 2.58018 | 3.03906 | 0.00365 | yes |
| XLOC_016012 | XLOC_016012 | Spata18       | chr5:74042610-74075882   | AAdko-FF-TTep | AAwt-FF-TTep | OK | 3.71945  | 37.9815 | 3.35214 | 3.16457 | 0.00275 | yes |
| XLOC_016057 | XLOC_016057 | Slc4a4        | chr5:89316284-89668681   | AAdko-FF-TTep | AAwt-FF-TTep | OK | 3.22591  | 17.3407 | 2.42638 | 3.05952 | 0.0052  | yes |
| XLOC_016081 | XLOC_016081 | Fam47e        | chr5:92984050-93020310   | AAdko-FF-TTep | AAwt-FF-TTep | OK | 3.98747  | 16.5705 | 2.05507 | 2.4477  | 0.0156  | yes |
| XLOC_016138 | XLOC_016138 | Rpl5          | chr5:108329546-108416096 | AAdko-FF-TTep | AAwt-FF-TTep | OK | 15.0522  | 75.4729 | 2.32598 | 2.79986 | 0.00535 | yes |
| XLOC_016189 | XLOC_016189 | Ankrd13a      | chr5:115225148-115255829 | AAdko-FF-TTep | AAwt-FF-TTep | OK | 3.68294  | 11.8835 | 1.69002 | 2.24682 | 0.0301  | yes |
| XLOC_016241 | XLOC_016241 | Ppp1cc        | chr5:122608287-122625278 | AAdko-FF-TTep | AAwt-FF-TTep | OK | 3.26829  | 12.3936 | 1.92299 | 2.33437 | 0.03125 | yes |

|             |             |           |                          |               |              |    |         |         |         |         |         |     |
|-------------|-------------|-----------|--------------------------|---------------|--------------|----|---------|---------|---------|---------|---------|-----|
| XLOC_016271 | XLOC_016271 | Tmed2     | chr5:124990799-125000512 | AAdko-FF-TTep | AAwt-FF-TTep | OK | 12.0515 | 41.1195 | 1.77061 | 2.3137  | 0.022   | yes |
| XLOC_016288 | XLOC_016288 | Ran       | chr5:129526030-129530196 | AAdko-FF-TTep | AAwt-FF-TTep | OK | 2.27422 | 14.4439 | 2.66702 | 3.18596 | 0.00615 | yes |
| XLOC_016293 | XLOC_016293 | Gbas      | chr5:130230949-130264201 | AAdko-FF-TTep | AAwt-FF-TTep | OK | 2.32083 | 12.9344 | 2.4785  | 3.02614 | 0.0076  | yes |
| XLOC_016294 | XLOC_016294 | Cct6a     | chr5:130293260-130322231 | AAdko-FF-TTep | AAwt-FF-TTep | OK | 3.62411 | 21.2227 | 2.54991 | 3.28039 | 0.00345 | yes |
| XLOC_016310 | XLOC_016310 | Rfc2      | chr5:135058559-135074198 | AAdko-FF-TTep | AAwt-FF-TTep | OK | 4.21218 | 15.9525 | 1.92114 | 2.25148 | 0.03625 | yes |
| XLOC_016440 | XLOC_016440 | Pan3      | chr5:148241444-148360077 | AAdko-FF-TTep | AAwt-FF-TTep | OK | 2.90977 | 14.2542 | 2.29241 | 3.03392 | 0.0052  | yes |
| XLOC_016493 | XLOC_016493 | Napepld   | chr5:21168720-21207163   | AAdko-FF-TTep | AAwt-FF-TTep | OK | 2.02096 | 11.9395 | 2.56263 | 3.37165 | 0.00275 | yes |
| XLOC_016506 | XLOC_016506 | Tomm7     | chr5:23344761-23349963   | AAdko-FF-TTep | AAwt-FF-TTep | OK | 6.1721  | 23.7015 | 1.94114 | 2.28391 | 0.0372  | yes |
| XLOC_016573 | XLOC_016573 | Lrpap1    | chr5:35434154-35448346   | AAdko-FF-TTep | AAwt-FF-TTep | OK | 10.4875 | 35.5445 | 1.76096 | 2.2657  | 0.031   | yes |
| XLOC_016587 | XLOC_016587 | Wfs1      | chr5:37357342-37380221   | AAdko-FF-TTep | AAwt-FF-TTep | OK | 8.15716 | 26.2389 | 1.68557 | 2.23915 | 0.0252  | yes |
| XLOC_016603 | XLOC_016603 | Fbxl5     | chr5:44135856-44173388   | AAdko-FF-TTep | AAwt-FF-TTep | OK | 2.7118  | 13.0369 | 2.26527 | 2.8895  | 0.00845 | yes |
| XLOC_016605 | XLOC_016605 | Prom1     | chr5:44384860-44492975   | AAdko-FF-TTep | AAwt-FF-TTep | OK | 4.40783 | 15.4833 | 1.81257 | 2.36988 | 0.0128  | yes |
| XLOC_016678 | XLOC_016678 | Hopx      | chr5:77516010-77544148   | AAdko-FF-TTep | AAwt-FF-TTep | OK | 0       | 11.9298 | Inf     | NA      | 0.0015  | yes |
| XLOC_016722 | XLOC_016722 | G3bp2     | chr5:92481171-92512761   | AAdko-FF-TTep | AAwt-FF-TTep | OK | 4.23369 | 16.5227 | 1.96446 | 2.58887 | 0.0135  | yes |
| XLOC_016725 | XLOC_016725 | Naaa      | chr5:92686685-92707207   | AAdko-FF-TTep | AAwt-FF-TTep | OK | 2.85595 | 21.764  | 2.9299  | 3.84187 | 0.00095 | yes |
| XLOC_016731 | XLOC_016731 | Scarb2    | chr5:92870364-92934662   | AAdko-FF-TTep | AAwt-FF-TTep | OK | 5.30086 | 16.9123 | 1.67378 | 2.06065 | 0.04305 | yes |
| XLOC_016859 | XLOC_016859 | Rnf10     | chr5:115691778-115722904 | AAdko-FF-TTep | AAwt-FF-TTep | OK | 6.33706 | 20.1667 | 1.67009 | 2.18731 | 0.03815 | yes |
| XLOC_016908 | XLOC_016908 | Atp2a2    | chr5:122903521-122952234 | AAdko-FF-TTep | AAwt-FF-TTep | OK | 8.05215 | 44.9063 | 2.47947 | 2.94566 | 0.0118  | yes |
| XLOC_016957 | XLOC_016957 | Gtf2i     | chr5:134713703-134790616 | AAdko-FF-TTep | AAwt-FF-TTep | OK | 4.62519 | 18.065  | 1.96561 | 2.57335 | 0.0157  | yes |
| XLOC_017094 | XLOC_017094 | Hmgb1     | chr5:149858803-149864613 | AAdko-FF-TTep | AAwt-FF-TTep | OK | 5.83782 | 29.584  | 2.34132 | 3.10889 | 0.00465 | yes |
| XLOC_017182 | XLOC_017182 | Tes       | chr6:17015148-17055825   | AAdko-FF-TTep | AAwt-FF-TTep | OK | 2.76621 | 15.0353 | 2.44237 | 3.0764  | 0.0068  | yes |
| XLOC_017188 | XLOC_017188 | Cftr      | chr6:18120652-18272769   | AAdko-FF-TTep | AAwt-FF-TTep | OK | 2.32966 | 13.1101 | 2.49249 | 3.1868  | 0.00265 | yes |
| XLOC_017324 | XLOC_017324 | Atp6v0e2  | chr6:48487567-48491799   | AAdko-FF-TTep | AAwt-FF-TTep | OK | 3.3455  | 20.559  | 2.61948 | 2.88726 | 0.01585 | yes |
| XLOC_017337 | XLOC_017337 | Abp1      | chr6:48845253-48859186   | AAdko-FF-TTep | AAwt-FF-TTep | OK | 4.52454 | 16.1848 | 1.8388  | 2.31504 | 0.02565 | yes |
| XLOC_017351 | XLOC_017351 | Cbx3      | chr6:51420614-51433703   | AAdko-FF-TTep | AAwt-FF-TTep | OK | 3.08097 | 14.0606 | 2.1902  | 2.69275 | 0.01675 | yes |
| XLOC_017411 | XLOC_017411 | Gng12     | chr6:66846390-66971355   | AAdko-FF-TTep | AAwt-FF-TTep | OK | 4.56473 | 18.3764 | 2.00925 | 2.52251 | 0.0156  | yes |
| XLOC_017417 | XLOC_017417 | Krcc1     | chr6:71222012-71235313   | AAdko-FF-TTep | AAwt-FF-TTep | OK | 1.65023 | 11.6201 | 2.81588 | 3.32911 | 0.00515 | yes |
| XLOC_017434 | XLOC_017434 | Suclg1    | chr6:73198498-73226901   | AAdko-FF-TTep | AAwt-FF-TTep | OK | 6.36246 | 21.6557 | 1.76709 | 2.1709  | 0.03795 | yes |
| XLOC_017498 | XLOC_017498 | Mgll      | chr6:88674405-88778354   | AAdko-FF-TTep | AAwt-FF-TTep | OK | 2.4455  | 13.8544 | 2.50215 | 2.51937 | 0.00335 | yes |
| XLOC_017595 | XLOC_017595 | Hnrnpf    | chr6:117850357-117875640 | AAdko-FF-TTep | AAwt-FF-TTep | OK | 8.67742 | 37.8295 | 2.12417 | 2.21    | 0.0104  | yes |
| XLOC_017653 | XLOC_017653 | Chd4      | chr6:125046180-125080519 | AAdko-FF-TTep | AAwt-FF-TTep | OK | 3.55064 | 16.3651 | 2.20447 | 2.86876 | 0.00585 | yes |
| XLOC_017681 | XLOC_017681 | Clec2d    | chr6:129130632-129136553 | AAdko-FF-TTep | AAwt-FF-TTep | OK | 8.05821 | 34.7544 | 2.10866 | 2.80122 | 0.008   | yes |
| XLOC_017727 | XLOC_017727 | Mgst1     | chr6:138089057-138105273 | AAdko-FF-TTep | AAwt-FF-TTep | OK | 19.8779 | 63.9097 | 1.68487 | 2.24902 | 0.02975 | yes |
| XLOC_017743 | XLOC_017743 | Etnk1     | chr6:143115749-143157066 | AAdko-FF-TTep | AAwt-FF-TTep | OK | 3.87243 | 24.4999 | 2.66146 | 2.8459  | 0.0063  | yes |
| XLOC_017769 | XLOC_017769 | Mettl20   | chr6:149090034-149099692 | AAdko-FF-TTep | AAwt-FF-TTep | OK | 1.94205 | 15.6473 | 3.01025 | 2.91543 | 0.0054  | yes |
| XLOC_017782 | XLOC_017782 | Pon2      | chr6:5214623-5248373     | AAdko-FF-TTep | AAwt-FF-TTep | OK | 2.70285 | 13.0027 | 2.26625 | 2.78593 | 0.0114  | yes |
| XLOC_017839 | XLOC_017839 | Ube2h     | chr6:30161288-30254539   | AAdko-FF-TTep | AAwt-FF-TTep | OK | 3.03101 | 11.9186 | 1.97534 | 2.67827 | 0.0128  | yes |
| XLOC_017860 | XLOC_017860 | Mtpn      | chr6:35458823-35489888   | AAdko-FF-TTep | AAwt-FF-TTep | OK | 1.77862 | 18.6945 | 3.39379 | 4.479   | 0.00055 | yes |
| XLOC_017875 | XLOC_017875 | Mkrn1     | chr6:39347819-39370368   | AAdko-FF-TTep | AAwt-FF-TTep | OK | 2.25388 | 15.1704 | 2.75078 | 3.37808 | 0.00435 | yes |
| XLOC_017935 | XLOC_017935 | Hnrnpa2b1 | chr6:51409442-51419993   | AAdko-FF-TTep | AAwt-FF-TTep | OK | 6.64691 | 49.399  | 2.89372 | 3.11205 | 0.00295 | yes |
| XLOC_017951 | XLOC_017951 | Hibadh    | chr6:52496223-52590294   | AAdko-FF-TTep | AAwt-FF-TTep | OK | 4.46272 | 15.2702 | 1.77472 | 2.19271 | 0.0383  | yes |
| XLOC_017956 | XLOC_017956 | Scrn1     | chr6:54455892-54516453   | AAdko-FF-TTep | AAwt-FF-TTep | OK | 4.3193  | 16.5148 | 1.93489 | 2.28655 | 0.02465 | yes |
| XLOC_017989 | XLOC_017989 | Hpgds     | chr6:65067187-65095256   | AAdko-FF-TTep | AAwt-FF-TTep | OK | 1.52476 | 18.9853 | 3.63824 | 4.30994 | 0.00015 | yes |

|             |             |                  |                          |               |              |    |          |         |         |         |         |     |
|-------------|-------------|------------------|--------------------------|---------------|--------------|----|----------|---------|---------|---------|---------|-----|
| XLOC_017997 | XLOC_017997 | Gadd45a          | chr6:66985089-67030646   | AAdko-FF-TTep | AAwt-FF-TTep | OK | 4.03127  | 21.3936 | 2.40787 | 2.85063 | 0.0118  | yes |
| XLOC_018020 | XLOC_018020 | Tgoln1           | chr6:72558414-72566994   | AAdko-FF-TTep | AAwt-FF-TTep | OK | 4.93864  | 18.428  | 1.89971 | 2.38103 | 0.02335 | yes |
| XLOC_018089 | XLOC_018089 | Cnbp             | chr6:87792608-87801100   | AAdko-FF-TTep | AAwt-FF-TTep | OK | 7.28923  | 32.7378 | 2.16712 | 2.83513 | 0.00985 | yes |
| XLOC_018160 | XLOC_018160 | Sec13            | chr6:113678045-113690675 | AAdko-FF-TTep | AAwt-FF-TTep | OK | 3.65699  | 15.4841 | 2.08206 | 2.2611  | 0.044   | yes |
| XLOC_018164 | XLOC_018164 | Timp4            | chr6:115084919-115232644 | AAdko-FF-TTep | AAwt-FF-TTep | OK | 2.15042  | 38.6776 | 4.16881 | 3.76374 | 0.01495 | yes |
| XLOC_018170 | XLOC_018170 | Efcab12          | chr6:115760746-115788525 | AAdko-FF-TTep | AAwt-FF-TTep | OK | 0.810239 | 13.2243 | 4.0287  | 3.34799 | 0.00545 | yes |
| XLOC_018190 | XLOC_018190 | Adipor2          | chr6:119303167-119367501 | AAdko-FF-TTep | AAwt-FF-TTep | OK | 2.90431  | 16.9065 | 2.54131 | 3.34223 | 0.00265 | yes |
| XLOC_018199 | XLOC_018199 | Atp6v1e1         | chr6:120745261-120772703 | AAdko-FF-TTep | AAwt-FF-TTep | OK | 4.57897  | 24.3463 | 2.4106  | 3.07928 | 0.0062  | yes |
| XLOC_018206 | XLOC_018206 | Apobec1          | chr6:122527809-122552462 | AAdko-FF-TTep | AAwt-FF-TTep | OK | 3.84235  | 18.9314 | 2.30072 | 3.05921 | 0.0049  | yes |
| XLOC_018208 | XLOC_018208 | Slc2a3           | chr6:122677826-122692763 | AAdko-FF-TTep | AAwt-FF-TTep | OK | 4.05689  | 20.335  | 2.32552 | 3.07084 | 0.0047  | yes |
| XLOC_018228 | XLOC_018228 | Lrrc23           | chr6:124719880-124729736 | AAdko-FF-TTep | AAwt-FF-TTep | OK | 3.42154  | 16.0659 | 2.23128 | 2.38983 | 0.02115 | yes |
| XLOC_018260 | XLOC_018260 | Tulp3            | chr6:128271178-128305869 | AAdko-FF-TTep | AAwt-FF-TTep | OK | 2.74216  | 12.6861 | 2.20986 | 2.80469 | 0.00995 | yes |
| XLOC_018364 | XLOC_018364 | Bcat1            | chr6:144942354-145024677 | AAdko-FF-TTep | AAwt-FF-TTep | OK | 4.09961  | 15.8264 | 1.94877 | 2.44455 | 0.01735 | yes |
| XLOC_018380 | XLOC_018380 | Caprin2          | chr6:148791013-148844694 | AAdko-FF-TTep | AAwt-FF-TTep | OK | 2.08987  | 11.6985 | 2.48483 | 2.44741 | 0.0159  | yes |
| XLOC_018381 | XLOC_018381 | Fam60a           | chr6:148869580-148894954 | AAdko-FF-TTep | AAwt-FF-TTep | OK | 2.07774  | 14.496  | 2.80257 | 3.58341 | 0.00245 | yes |
| XLOC_018733 | XLOC_018733 | Akt2             | chr7:28376578-28424472   | AAdko-FF-TTep | AAwt-FF-TTep | OK | 4.65275  | 15.1915 | 1.70711 | 2.191   | 0.03925 | yes |
| XLOC_018797 | XLOC_018797 | Dmkn             | chr7:31548774-31566085   | AAdko-FF-TTep | AAwt-FF-TTep | OK | 6.00377  | 24.904  | 2.05244 | 1.98328 | 0.0486  | yes |
| XLOC_018925 | XLOC_018925 | Ccdc114          | chr7:53179600-53204847   | AAdko-FF-TTep | AAwt-FF-TTep | OK | 2.99833  | 17.0718 | 2.50938 | 2.6926  | 0.019   | yes |
| XLOC_019020 | XLOC_019020 | Fam103a1         | chr7:88907838-88914376   | AAdko-FF-TTep | AAwt-FF-TTep | OK | 1.75487  | 12.0067 | 2.77441 | 2.94223 | 0.0132  | yes |
| XLOC_019067 | XLOC_019067 | Kctd14           | chr7:104599843-104609214 | AAdko-FF-TTep | AAwt-FF-TTep | OK | 18.5986  | 58.4258 | 1.65141 | 2.02639 | 0.0496  | yes |
| XLOC_019088 | XLOC_019088 | Kcne3            | chr7:107325179-107333582 | AAdko-FF-TTep | AAwt-FF-TTep | OK | 4.53644  | 39.1858 | 3.1107  | 3.54761 | 0.00195 | yes |
| XLOC_019089 | XLOC_019089 | Pgm2l1           | chr7:107376116-107427382 | AAdko-FF-TTep | AAwt-FF-TTep | OK | 2.12372  | 18.5677 | 3.12813 | 3.6973  | 0.00045 | yes |
| XLOC_019100 | XLOC_019100 | Arap1            | chr7:108496582-108561100 | AAdko-FF-TTep | AAwt-FF-TTep | OK | 3.9155   | 13.443  | 1.77958 | 2.19039 | 0.03195 | yes |
| XLOC_019239 | XLOC_019239 | Parva            | chr7:119571219-119735202 | AAdko-FF-TTep | AAwt-FF-TTep | OK | 4.01416  | 11.8622 | 1.5632  | 2.07092 | 0.0483  | yes |
| XLOC_019272 | XLOC_019272 | Vwa3a            | chr7:127883070-127949054 | AAdko-FF-TTep | AAwt-FF-TTep | OK | 0.85469  | 14.091  | 4.04323 | 4.7863  | 0.0006  | yes |
| XLOC_019424 | XLOC_019424 | Ifitm1           | chr7:148153327-148155726 | AAdko-FF-TTep | AAwt-FF-TTep | OK | 11.6355  | 94.8525 | 3.02716 | 3.33937 | 0.00355 | yes |
| XLOC_019572 | XLOC_019572 | Chmp2a           | chr7:13617354-13620126   | AAdko-FF-TTep | AAwt-FF-TTep | OK | 8.9883   | 31.9899 | 1.8315  | 2.36424 | 0.02365 | yes |
| XLOC_019740 | XLOC_019740 | Hnrnpul1         | chr7:26506185-26539942   | AAdko-FF-TTep | AAwt-FF-TTep | OK | 4.26368  | 15.438  | 1.85631 | 2.00752 | 0.0414  | yes |
| XLOC_019761 | XLOC_019761 | Psmc4            | chr7:28826720-28835111   | AAdko-FF-TTep | AAwt-FF-TTep | OK | 1.5936   | 13.3546 | 3.06698 | 2.86721 | 0.0253  | yes |
| XLOC_020177 | XLOC_020177 | Lrrc51           | chr7:109061501-109082371 | AAdko-FF-TTep | AAwt-FF-TTep | OK | 8.27155  | 37.4094 | 2.17717 | 2.41709 | 0.02035 | yes |
| XLOC_020328 | XLOC_020328 | St5              | chr7:116667220-116760661 | AAdko-FF-TTep | AAwt-FF-TTep | OK | 3.5862   | 12.674  | 1.82134 | 2.31143 | 0.02465 | yes |
| XLOC_020329 | XLOC_020329 | BC051019         | chr7:116847250-116867285 | AAdko-FF-TTep | AAwt-FF-TTep | OK | 3.52537  | 15.2194 | 2.11006 | 2.1606  | 0.04785 | yes |
| XLOC_020341 | XLOC_020341 | Eif4g2           | chr7:118211498-118226544 | AAdko-FF-TTep | AAwt-FF-TTep | OK | 6.88859  | 45.186  | 2.7136  | 2.43839 | 0.02425 | yes |
| XLOC_020349 | XLOC_020349 | Copb1            | chr7:121359072-121398194 | AAdko-FF-TTep | AAwt-FF-TTep | OK | 5.55634  | 16.5313 | 1.573   | 2.06145 | 0.047   | yes |
| XLOC_020350 | XLOC_020350 | Psmc1            | chr7:121408063-121419630 | AAdko-FF-TTep | AAwt-FF-TTep | OK | 3.41873  | 15.5826 | 2.1884  | 2.45354 | 0.0263  | yes |
| XLOC_020357 | XLOC_020357 | Rps13            | chr7:123475020-123477704 | AAdko-FF-TTep | AAwt-FF-TTep | OK | 37.9516  | 139.199 | 1.87491 | 2.47752 | 0.0202  | yes |
| XLOC_020366 | XLOC_020366 | Gde1             | chr7:125832071-125849252 | AAdko-FF-TTep | AAwt-FF-TTep | OK | 7.86661  | 26.2582 | 1.73895 | 2.29837 | 0.02435 | yes |
| XLOC_020417 | XLOC_020417 | Eif3c            | chr7:133690424-133709880 | AAdko-FF-TTep | AAwt-FF-TTep | OK | 2.65812  | 22.9697 | 3.11126 | 4.15384 | 0.00075 | yes |
| XLOC_020512 | XLOC_020512 | 6430531B16Rik,Ad | chr7:147158201-147178399 | AAdko-FF-TTep | AAwt-FF-TTep | OK | 5.88773  | 71.2776 | 3.59767 | 4.06684 | 0.0003  | yes |
| XLOC_020578 | XLOC_020578 | Nap1l4           | chr7:150699483-150735093 | AAdko-FF-TTep | AAwt-FF-TTep | OK | 2.57946  | 15.7376 | 2.60908 | 3.30356 | 0.0043  | yes |
| XLOC_020583 | XLOC_020583 | Osbpl5           | chr7:150874666-150927868 | AAdko-FF-TTep | AAwt-FF-TTep | OK | 1.86574  | 11.6423 | 2.64156 | 3.06077 | 0.00735 | yes |
| XLOC_020587 | XLOC_020587 | Cttn             | chr7:151621628-151656840 | AAdko-FF-TTep | AAwt-FF-TTep | OK | 6.2225   | 19.2582 | 1.62991 | 2.15899 | 0.033   | yes |
| XLOC_020590 | XLOC_020590 | Ano1             | chr7:151774453-151924497 | AAdko-FF-TTep | AAwt-FF-TTep | OK | 4.33153  | 19.1964 | 2.14789 | 2.84358 | 0.0062  | yes |

|             |             |             |                          |               |              |    |          |         |         |         |         |     |
|-------------|-------------|-------------|--------------------------|---------------|--------------|----|----------|---------|---------|---------|---------|-----|
| XLOC_020591 | XLOC_020591 | Ccnd1       | chr7:152115835-152125830 | AAdko-FF-TTep | AAwt-FF-TTep | OK | 6.39303  | 19.1527 | 1.58297 | 2.11285 | 0.04295 | yes |
| XLOC_020762 | XLOC_020762 | Plat        | chr8:23868215-23893320   | AAdko-FF-TTep | AAwt-FF-TTep | OK | 23.6021  | 87.9542 | 1.89784 | 2.09192 | 0.0401  | yes |
| XLOC_020931 | XLOC_020931 | Tpm4        | chr8:74659190-74677028   | AAdko-FF-TTep | AAwt-FF-TTep | OK | 4.44673  | 17.2049 | 1.952   | 2.58282 | 0.013   | yes |
| XLOC_020934 | XLOC_020934 | Fam32a      | chr8:74743613-74750950   | AAdko-FF-TTep | AAwt-FF-TTep | OK | 3.35132  | 15.6206 | 2.22065 | 2.64986 | 0.01575 | yes |
| XLOC_020939 | XLOC_020939 | Nwd1        | chr8:75170544-75240775   | AAdko-FF-TTep | AAwt-FF-TTep | OK | 1.54156  | 15.362  | 3.3169  | 4.21931 | 0.0003  | yes |
| XLOC_020954 | XLOC_020954 | Ttc29       | chr8:80737240-80918225   | AAdko-FF-TTep | AAwt-FF-TTep | OK | 0.681035 | 13.8823 | 4.34937 | 4.78117 | 0.003   | yes |
| XLOC_021030 | XLOC_021030 | Mt3         | chr8:96676506-96678048   | AAdko-FF-TTep | AAwt-FF-TTep | OK | 0        | 22.4091 | Inf     | NA      | 0.01205 | yes |
| XLOC_021090 | XLOC_021090 | Lrrc36      | chr8:107937521-107989454 | AAdko-FF-TTep | AAwt-FF-TTep | OK | 0.400165 | 17.653  | 5.46317 | 3.4473  | 0.00485 | yes |
| XLOC_021099 | XLOC_021099 | Nutf2       | chr8:108384533-108404301 | AAdko-FF-TTep | AAwt-FF-TTep | OK | 2.23497  | 13.8939 | 2.63612 | 2.54503 | 0.0255  | yes |
| XLOC_021119 | XLOC_021119 | Cyb5b       | chr8:109674560-109711370 | AAdko-FF-TTep | AAwt-FF-TTep | OK | 5.98907  | 21.818  | 1.86512 | 2.37076 | 0.0265  | yes |
| XLOC_021153 | XLOC_021153 | Dynlrb2     | chr8:119028914-119039815 | AAdko-FF-TTep | AAwt-FF-TTep | OK | 16.61    | 70.7136 | 2.08994 | 2.64665 | 0.01495 | yes |
| XLOC_021224 | XLOC_021224 | Tsnax       | chr8:127536896-127558092 | AAdko-FF-TTep | AAwt-FF-TTep | OK | 5.19835  | 17.7188 | 1.76916 | 2.34245 | 0.02685 | yes |
| XLOC_021235 | XLOC_021235 | Itgb1       | chr8:131209553-131257479 | AAdko-FF-TTep | AAwt-FF-TTep | OK | 3.92753  | 14.419  | 1.87627 | 2.51786 | 0.01575 | yes |
| XLOC_021312 | XLOC_021312 | Nek5        | chr8:23183906-23235560   | AAdko-FF-TTep | AAwt-FF-TTep | OK | 1.0031   | 14.6436 | 3.86773 | 4.13502 | 0.00095 | yes |
| XLOC_021317 | XLOC_021317 | Vdac3       | chr8:23687546-23704285   | AAdko-FF-TTep | AAwt-FF-TTep | OK | 4.36298  | 16.5858 | 1.92656 | 2.33645 | 0.0242  | yes |
| XLOC_021394 | XLOC_021394 | Fam149a     | chr8:46422068-46468020   | AAdko-FF-TTep | AAwt-FF-TTep | OK | 1.18234  | 14.1207 | 3.57809 | 4.14084 | 0.00135 | yes |
| XLOC_021546 | XLOC_021546 | Nacc1       | chr8:87194377-87211761   | AAdko-FF-TTep | AAwt-FF-TTep | OK | 2.84101  | 12.8609 | 2.17852 | 2.85333 | 0.0082  | yes |
| XLOC_021563 | XLOC_021563 | Dnaja2      | chr8:88061538-88079170   | AAdko-FF-TTep | AAwt-FF-TTep | OK | 2.31235  | 13.2838 | 2.52223 | 3.29742 | 0.0031  | yes |
| XLOC_021565 | XLOC_021565 | Itfg1       | chr8:88241455-88364848   | AAdko-FF-TTep | AAwt-FF-TTep | OK | 1.85178  | 14.6702 | 2.9859  | 3.93731 | 0.0011  | yes |
| XLOC_021583 | XLOC_021583 | Ces1d       | chr8:95689970-95721703   | AAdko-FF-TTep | AAwt-FF-TTep | OK | 9.14667  | 26.5114 | 1.53529 | 2.0487  | 0.0459  | yes |
| XLOC_021589 | XLOC_021589 | Gmfr        | chr8:96495487-96536540   | AAdko-FF-TTep | AAwt-FF-TTep | OK | 8.06627  | 24.6041 | 1.60892 | 2.14804 | 0.0399  | yes |
| XLOC_021601 | XLOC_021601 | Atl3        | chr8:97944149-97958769   | AAdko-FF-TTep | AAwt-FF-TTep | OK | 3.26367  | 17.7785 | 2.44557 | 2.82038 | 0.01215 | yes |
| XLOC_021604 | XLOC_021604 | Cnot1       | chr8:98243350-98345628   | AAdko-FF-TTep | AAwt-FF-TTep | OK | 2.15671  | 18.0359 | 3.06397 | 3.78056 | 0.00035 | yes |
| XLOC_021612 | XLOC_021612 | Cmtm4       | chr8:106872092-106919707 | AAdko-FF-TTep | AAwt-FF-TTep | OK | 4.71701  | 15.7271 | 1.73731 | 2.21162 | 0.03255 | yes |
| XLOC_021808 | XLOC_021808 | Tmem123     | chr9:7764076-7794332     | AAdko-FF-TTep | AAwt-FF-TTep | OK | 3.02646  | 16.6488 | 2.45972 | 3.26224 | 0.0032  | yes |
| XLOC_021965 | XLOC_021965 | Vwa5a       | chr9:38525852-38550922   | AAdko-FF-TTep | AAwt-FF-TTep | OK | 2.97643  | 19.3254 | 2.69885 | 3.64154 | 0.0005  | yes |
| XLOC_022019 | XLOC_022019 | Ccdc153     | chr9:44048759-44055389   | AAdko-FF-TTep | AAwt-FF-TTep | OK | 8.29696  | 82.9209 | 3.32108 | 4.28895 | 0.00055 | yes |
| XLOC_022026 | XLOC_022026 | Ddx6        | chr9:44411165-44448902   | AAdko-FF-TTep | AAwt-FF-TTep | OK | 2.93971  | 14.8918 | 2.34077 | 3.09952 | 0.0024  | yes |
| XLOC_022083 | XLOC_022083 | Dnaja4      | chr9:54547365-54564124   | AAdko-FF-TTep | AAwt-FF-TTep | OK | 2.61608  | 20.5333 | 2.97249 | 3.77457 | 0.00225 | yes |
| XLOC_022195 | XLOC_022195 | Nedd4       | chr9:72510153-72597655   | AAdko-FF-TTep | AAwt-FF-TTep | OK | 6.54515  | 28.872  | 2.14117 | 2.39957 | 0.0271  | yes |
| XLOC_022220 | XLOC_022220 | Elov5       | chr9:77765171-77832326   | AAdko-FF-TTep | AAwt-FF-TTep | OK | 4.00204  | 20.6216 | 2.36535 | 3.16836 | 0.00325 | yes |
| XLOC_022333 | XLOC_022333 | Zmynd10     | chr9:107449640-107453650 | AAdko-FF-TTep | AAwt-FF-TTep | OK | 4.95778  | 22.3446 | 2.17216 | 2.59307 | 0.01865 | yes |
| XLOC_022353 | XLOC_022353 | Rhoa        | chr9:108208535-108240270 | AAdko-FF-TTep | AAwt-FF-TTep | OK | 10.9286  | 37.6674 | 1.78521 | 2.38212 | 0.0232  | yes |
| XLOC_022360 | XLOC_022360 | Usp19       | chr9:108393006-108404668 | AAdko-FF-TTep | AAwt-FF-TTep | OK | 3.98284  | 12.9747 | 1.70384 | 2.1841  | 0.0291  | yes |
| XLOC_022363 | XLOC_022363 | Impdh2      | chr9:108462831-108467897 | AAdko-FF-TTep | AAwt-FF-TTep | OK | 2.00235  | 13.5333 | 2.75675 | 2.71781 | 0.01875 | yes |
| XLOC_022416 | XLOC_022416 | Osbpl10     | chr9:114976396-115142384 | AAdko-FF-TTep | AAwt-FF-TTep | OK | 1.78818  | 12.9567 | 2.85714 | 3.17735 | 0.00625 | yes |
| XLOC_022427 | XLOC_022427 | Dlec1       | chr9:119011595-119066211 | AAdko-FF-TTep | AAwt-FF-TTep | OK | 1.67989  | 13.5222 | 3.0089  | 3.73249 | 0.00165 | yes |
| XLOC_022433 | XLOC_022433 | Ttc21a      | chr9:119846723-119878473 | AAdko-FF-TTep | AAwt-FF-TTep | OK | 1.20485  | 19.5014 | 4.01666 | 4.53585 | 0.0009  | yes |
| XLOC_022442 | XLOC_022442 | Rpl14       | chr9:120480633-120483770 | AAdko-FF-TTep | AAwt-FF-TTep | OK | 29.766   | 107.239 | 1.84909 | 2.40803 | 0.0197  | yes |
| XLOC_022486 | XLOC_022486 | Yap1        | chr9:7932000-8004596     | AAdko-FF-TTep | AAwt-FF-TTep | OK | 3.95951  | 17.2688 | 2.12477 | 2.85785 | 0.00565 | yes |
| XLOC_022519 | XLOC_022519 | Olfr856-ps1 | chr9:19461482-19463124   | AAdko-FF-TTep | AAwt-FF-TTep | OK | 7.00532  | 30.725  | 2.13289 | 2.79122 | 0.01    | yes |
| XLOC_022559 | XLOC_022559 | Ccdc151     | chr9:21794314-21807078   | AAdko-FF-TTep | AAwt-FF-TTep | OK | 1.09497  | 13.2511 | 3.59714 | 3.70629 | 0.0061  | yes |
| XLOC_022563 | XLOC_022563 | Elof1       | chr9:21917432-21921612   | AAdko-FF-TTep | AAwt-FF-TTep | OK | 24.6092  | 82.0453 | 1.73722 | 2.22514 | 0.0299  | yes |



|             |             |               |                          |               |              |    |         |         |         |         |         |     |
|-------------|-------------|---------------|--------------------------|---------------|--------------|----|---------|---------|---------|---------|---------|-----|
| XLOC_022580 | XLOC_022580 | Jam3          | chr9:26904968-26963006   | AAdko-FF-TTep | AAwt-FF-TTep | OK | 2.32499 | 24.61   | 3.40395 | 4.04831 | 0.00165 | yes |
| XLOC_022585 | XLOC_022585 | Aplp2         | chr9:30942991-31066970   | AAdko-FF-TTep | AAwt-FF-TTep | OK | 5.44376 | 19.1019 | 1.81104 | 2.33364 | 0.02355 | yes |
| XLOC_022611 | XLOC_022611 | Stt3a         | chr9:36539997-36575163   | AAdko-FF-TTep | AAwt-FF-TTep | OK | 5.14226 | 16.7945 | 1.70751 | 2.22919 | 0.03195 | yes |
| XLOC_022684 | XLOC_022684 | Arcn1         | chr9:44550227-44575891   | AAdko-FF-TTep | AAwt-FF-TTep | OK | 4.32387 | 14.5131 | 1.74696 | 2.33239 | 0.02175 | yes |
| XLOC_022725 | XLOC_022725 | 1110032A03Rik | chr9:50570932-50576257   | AAdko-FF-TTep | AAwt-FF-TTep | OK | 2.86873 | 17.5336 | 2.61164 | 3.33409 | 0.0042  | yes |
| XLOC_022728 | XLOC_022728 | 4833427G06Rik | chr9:50889272-50913934   | AAdko-FF-TTep | AAwt-FF-TTep | OK | 2.86409 | 15.347  | 2.42181 | 2.52292 | 0.02545 | yes |
| XLOC_022776 | XLOC_022776 | Ccdc33        | chr9:57876479-57966664   | AAdko-FF-TTep | AAwt-FF-TTep | OK | 3.69539 | 13.8906 | 1.91031 | 2.4104  | 0.0208  | yes |
| XLOC_022816 | XLOC_022816 | Rab11a        | chr9:64563106-64585563   | AAdko-FF-TTep | AAwt-FF-TTep | OK | 1.53699 | 12.1293 | 2.98032 | 3.41791 | 0.0045  | yes |
| XLOC_022832 | XLOC_022832 | Tpm1          | chr9:66870399-66897020   | AAdko-FF-TTep | AAwt-FF-TTep | OK | 2.23479 | 20.5685 | 3.20223 | 3.19939 | 0.0004  | yes |
| XLOC_022852 | XLOC_022852 | Gm5918        | chr9:72827532-72833183   | AAdko-FF-TTep | AAwt-FF-TTep | OK | 2.9192  | 20.9264 | 2.84168 | 2.60944 | 0.03195 | yes |
| XLOC_022905 | XLOC_022905 | Morf411       | chr9:89986506-90009658   | AAdko-FF-TTep | AAwt-FF-TTep | OK | 12.7985 | 43.4155 | 1.76223 | 2.32782 | 0.02035 | yes |
| XLOC_022955 | XLOC_022955 | Acpp          | chr9:104189921-104240052 | AAdko-FF-TTep | AAwt-FF-TTep | OK | 2.96261 | 13.5751 | 2.19602 | 2.96741 | 0.00475 | yes |
| XLOC_022965 | XLOC_022965 | Alas1         | chr9:106135785-106150285 | AAdko-FF-TTep | AAwt-FF-TTep | OK | 3.93711 | 15.8274 | 2.00721 | 2.61823 | 0.01395 | yes |
| XLOC_022976 | XLOC_022976 | Manf          | chr9:106789745-106794269 | AAdko-FF-TTep | AAwt-FF-TTep | OK | 5.69886 | 21.846  | 1.93862 | 2.56791 | 0.01545 | yes |
| XLOC_022982 | XLOC_022982 | Gnai2         | chr9:107516468-107537673 | AAdko-FF-TTep | AAwt-FF-TTep | OK | 11.784  | 35.9971 | 1.61105 | 2.13158 | 0.0397  | yes |
| XLOC_023272 | XLOC_023272 | Mid1ip1       | chrX:10294490-10296828   | AAdko-FF-TTep | AAwt-FF-TTep | OK | 15.6134 | 46.0497 | 1.56041 | 2.05083 | 0.0492  | yes |
| XLOC_023288 | XLOC_023288 | Usp9x         | chrX:12648623-12750453   | AAdko-FF-TTep | AAwt-FF-TTep | OK | 1.83206 | 11.974  | 2.70837 | 3.32932 | 0.0028  | yes |
| XLOC_023289 | XLOC_023289 | Ddx3x         | chrX:12858147-12871174   | AAdko-FF-TTep | AAwt-FF-TTep | OK | 4.30765 | 23.7013 | 2.45999 | 3.17754 | 0.00325 | yes |
| XLOC_023331 | XLOC_023331 | Pgrmc1        | chrX:34138219-34146074   | AAdko-FF-TTep | AAwt-FF-TTep | OK | 1.88886 | 11.6935 | 2.63013 | 3.00092 | 0.0093  | yes |
| XLOC_023401 | XLOC_023401 | Fhl1          | chrX:53984963-54046523   | AAdko-FF-TTep | AAwt-FF-TTep | OK | 7.71529 | 33.2389 | 2.10708 | 2.82223 | 0.00605 | yes |
| XLOC_023465 | XLOC_023465 | Gdl1          | chrX:71550350-71557206   | AAdko-FF-TTep | AAwt-FF-TTep | OK | 6.79022 | 19.3879 | 1.51363 | 2.03937 | 0.04575 | yes |
| XLOC_023478 | XLOC_023478 | Tbl1x         | chrX:74756246-74908311   | AAdko-FF-TTep | AAwt-FF-TTep | OK | 3.48881 | 11.7417 | 1.75084 | 2.20583 | 0.03245 | yes |
| XLOC_023571 | XLOC_023571 | Sh3bgrl       | chrX:106290745-106357806 | AAdko-FF-TTep | AAwt-FF-TTep | OK | 3.99724 | 17.5714 | 2.13615 | 2.84108 | 0.0075  | yes |
| XLOC_023620 | XLOC_023620 | Wbp5          | chrX:132779618-132781678 | AAdko-FF-TTep | AAwt-FF-TTep | OK | 11.0737 | 45.3294 | 2.03331 | 2.72264 | 0.0086  | yes |
| XLOC_023621 | XLOC_023621 | Ngfrap1       | chrX:132804791-132806517 | AAdko-FF-TTep | AAwt-FF-TTep | OK | 15.5177 | 44.4118 | 1.51703 | 2.00626 | 0.04795 | yes |
| XLOC_023636 | XLOC_023636 | Rnf128        | chrX:136097878-136207684 | AAdko-FF-TTep | AAwt-FF-TTep | OK | 4.61498 | 26.5849 | 2.52621 | 3.32514 | 0.0022  | yes |
| XLOC_023638 | XLOC_023638 | Cldn2         | chrX:136335346-136345927 | AAdko-FF-TTep | AAwt-FF-TTep | OK | 2.47781 | 19.8329 | 3.00076 | 3.83029 | 0.0013  | yes |
| XLOC_023679 | XLOC_023679 | Huwe1         | chrX:148237555-148369961 | AAdko-FF-TTep | AAwt-FF-TTep | OK | 3.00904 | 13.3394 | 2.14831 | 2.20335 | 0.02205 | yes |
| XLOC_023715 | XLOC_023715 | Rbbp7         | chrX:159198303-159267331 | AAdko-FF-TTep | AAwt-FF-TTep | OK | 4.87505 | 27.06   | 2.47268 | 3.27021 | 0.00285 | yes |
| XLOC_023717 | XLOC_023717 | Ap1s2         | chrX:160346927-160371861 | AAdko-FF-TTep | AAwt-FF-TTep | OK | 10.7945 | 58.5778 | 2.44005 | 2.01699 | 0.03785 | yes |
| XLOC_023779 | XLOC_023779 | Dynlt3        | chrX:9231395-9240109     | AAdko-FF-TTep | AAwt-FF-TTep | OK | 2.83894 | 17.2917 | 2.60665 | 3.4238  | 0.00165 | yes |
| XLOC_023792 | XLOC_023792 | Fundc1        | chrX:17133694-17149423   | AAdko-FF-TTep | AAwt-FF-TTep | OK | 1.55552 | 11.8933 | 2.93468 | 3.29596 | 0.005   | yes |
| XLOC_023854 | XLOC_023854 | Lamp2         | chrX:35758240-35809632   | AAdko-FF-TTep | AAwt-FF-TTep | OK | 9.13921 | 39.0491 | 2.09515 | 2.46736 | 0.016   | yes |
| XLOC_023878 | XLOC_023878 | 6720401G13Rik | chrX:47908826-47988491   | AAdko-FF-TTep | AAwt-FF-TTep | OK | 3.28363 | 12.113  | 1.88319 | 2.28707 | 0.01855 | yes |
| XLOC_023952 | XLOC_023952 | Ids           | chrX:67596244-67618260   | AAdko-FF-TTep | AAwt-FF-TTep | OK | 1.81163 | 18.7229 | 3.36944 | 4.50859 | 0.00005 | yes |
| XLOC_023963 | XLOC_023963 | Cetn2         | chrX:70158903-70163683   | AAdko-FF-TTep | AAwt-FF-TTep | OK | 2.18789 | 28.2249 | 3.68936 | 4.01582 | 0.0043  | yes |
| XLOC_023976 | XLOC_023976 | Bcap31        | chrX:70931521-70961514   | AAdko-FF-TTep | AAwt-FF-TTep | OK | 5.54782 | 28.4636 | 2.35913 | 2.83248 | 0.01195 | yes |
| XLOC_023977 | XLOC_023977 | ldh3g         | chrX:71024301-71032236   | AAdko-FF-TTep | AAwt-FF-TTep | OK | 3.69941 | 17.2748 | 2.2233  | 2.56703 | 0.02075 | yes |
| XLOC_024034 | XLOC_024034 | Eif2s3x       | chrX:91434047-91457990   | AAdko-FF-TTep | AAwt-FF-TTep | OK | 4.81209 | 20.2445 | 2.07279 | 2.7603  | 0.0109  | yes |
| XLOC_024073 | XLOC_024073 | Xist          | chrX:100626855-100680296 | AAdko-FF-TTep | AAwt-FF-TTep | OK | 4.68478 | 27.73   | 2.5654  | 2.35182 | 0.02785 | yes |
| XLOC_024137 | XLOC_024137 | Morf412       | chrX:133267489-133337900 | AAdko-FF-TTep | AAwt-FF-TTep | OK | 6.3057  | 25.0803 | 1.99182 | 2.58827 | 0.01145 | yes |
| XLOC_024173 | XLOC_024173 | Maged2        | chrX:147240963-147248882 | AAdko-FF-TTep | AAwt-FF-TTep | OK | 3.49825 | 12.7984 | 1.87126 | 2.27251 | 0.03195 | yes |
| XLOC_024207 | XLOC_024207 | Pdha1         | chrX:156426364-156576268 | AAdko-FF-TTep | AAwt-FF-TTep | OK | 6.05156 | 18.4192 | 1.60583 | 2.09503 | 0.0454  | yes |



**Table S2. The significantly dys-regulated gene transcripts as determined by RNA-Seq in oviductal smooth muscle cells of miR-dKO mice.**

| test_id     | gene_id     | gene                      | locus                     | sample_1      | sample_2     | status | value_1  | value_2 | log2.fold_c | test_stat | p_value | significant |
|-------------|-------------|---------------------------|---------------------------|---------------|--------------|--------|----------|---------|-------------|-----------|---------|-------------|
| XLOC_000404 | XLOC_000404 | Csrp1                     | chr1:137625773-137648806  | AAdko-FF-TTmu | AAwt-FF-TTmu | OK     | 12.5468  | 3.05826 | -2.03653    | -2.57896  | 0.0174  | yes         |
| XLOC_001572 | XLOC_001572 | Chchd10                   | chr10:75398317-75400479   | AAdko-FF-TTmu | AAwt-FF-TTmu | OK     | 9.90026  | 50.7761 | 2.35861     | 2.40697   | 0.0472  | yes         |
| XLOC_001600 | XLOC_001600 | Gm10318                   | chr10:77315603-77316533   | AAdko-FF-TTmu | AAwt-FF-TTmu | OK     | 45.5992  | 0       | #NAME?      | NA        | 0.0045  | yes         |
| XLOC_001648 | XLOC_001648 | Ndufs7                    | chr10:79712196-79719537   | AAdko-FF-TTmu | AAwt-FF-TTmu | OK     | 12.2513  | 0       | #NAME?      | NA        | 0.01325 | yes         |
| XLOC_001855 | XLOC_001855 | Naca                      | chr10:127472401-127485693 | AAdko-FF-TTmu | AAwt-FF-TTmu | OK     | 13.6472  | 3.15419 | -2.11327    | -2.44054  | 0.0198  | yes         |
| XLOC_002140 | XLOC_002140 | Krtap10-4                 | chr10:77288913-77289815   | AAdko-FF-TTmu | AAwt-FF-TTmu | OK     | 45.6945  | 0       | #NAME?      | NA        | 0.00155 | yes         |
| XLOC_002552 | XLOC_002552 | Xbp1                      | chr11:5420643-5425996     | AAdko-FF-TTmu | AAwt-FF-TTmu | OK     | 14.1129  | 3.8574  | -1.87132    | -2.42152  | 0.0209  | yes         |
| XLOC_002621 | XLOC_002621 | Hba-a1,Hba-a2             | chr11:32183671-32184493   | AAdko-FF-TTmu | AAwt-FF-TTmu | OK     | 16.7012  | 0       | #NAME?      | NA        | 0.0003  | yes         |
| XLOC_003097 | XLOC_003097 | Col1a1                    | chr11:94797583-94813170   | AAdko-FF-TTmu | AAwt-FF-TTmu | OK     | 3.98035  | 13.4481 | 1.75643     | 2.23103   | 0.03115 | yes         |
| XLOC_004016 | XLOC_004016 | Krt19                     | chr11:100002125-100007233 | AAdko-FF-TTmu | AAwt-FF-TTmu | OK     | 19.0805  | 5.12892 | -1.89537    | -2.37938  | 0.0225  | yes         |
| XLOC_004871 | XLOC_004871 | Rpl36al                   | chr12:70283720-70285054   | AAdko-FF-TTmu | AAwt-FF-TTmu | OK     | 44.5344  | 8.64728 | -2.3646     | -2.85971  | 0.01175 | yes         |
| XLOC_006812 | XLOC_006812 | Gm10845                   | chr14:80260327-80268983   | AAdko-FF-TTmu | AAwt-FF-TTmu | OK     | 13.8538  | 3.15919 | -2.13266    | -2.40801  | 0.02355 | yes         |
| XLOC_007042 | XLOC_007042 | Ly6e                      | chr15:74785480-74790335   | AAdko-FF-TTmu | AAwt-FF-TTmu | OK     | 16.7257  | 3.59561 | -2.21776    | -2.77762  | 0.00495 | yes         |
| XLOC_007089 | XLOC_007089 | Lgals1                    | chr15:78757154-78760895   | AAdko-FF-TTmu | AAwt-FF-TTmu | OK     | 27.3629  | 9.23851 | -1.56649    | -2.05196  | 0.04755 | yes         |
| XLOC_007143 | XLOC_007143 | Rnu12                     | chr15:82980074-82980224   | AAdko-FF-TTmu | AAwt-FF-TTmu | OK     | 87.0132  | 0       | #NAME?      | NA        | 0.01325 | yes         |
| XLOC_007145 | XLOC_007145 | Tspo                      | chr15:83394002-83404633   | AAdko-FF-TTmu | AAwt-FF-TTmu | OK     | 0        | 12.3262 | Inf         | NA        | 0.00205 | yes         |
| XLOC_007237 | XLOC_007237 | Dazap2                    | chr15:100446092-100451192 | AAdko-FF-TTmu | AAwt-FF-TTmu | OK     | 17.1804  | 5.0778  | -1.75849    | -2.33321  | 0.02365 | yes         |
| XLOC_007340 | XLOC_007340 | Cox6c                     | chr15:35861730-35868001   | AAdko-FF-TTmu | AAwt-FF-TTmu | OK     | 44.6431  | 14.2933 | -1.6431     | -2.07427  | 0.04835 | yes         |
| XLOC_007438 | XLOC_007438 | 2300005B03Rik             | chr15:74573268-74577117   | AAdko-FF-TTmu | AAwt-FF-TTmu | OK     | 16.2851  | 0       | #NAME?      | NA        | 0.03545 | yes         |
| XLOC_007613 | XLOC_007613 | Odf3b,Sco2,Tymp           | chr15:89186149-89209846   | AAdko-FF-TTmu | AAwt-FF-TTmu | OK     | 1.16944  | 15.7228 | 3.74897     | 1.90637   | 0.0112  | yes         |
| XLOC_007677 | XLOC_007677 | Tuba1a                    | chr15:98780277-98783932   | AAdko-FF-TTmu | AAwt-FF-TTmu | OK     | 6.31472  | 23.9893 | 1.9256      | 2.32953   | 0.0267  | yes         |
| XLOC_007736 | XLOC_007736 | Atp5g2                    | chr15:102493298-102501478 | AAdko-FF-TTmu | AAwt-FF-TTmu | OK     | 30.7006  | 5.99591 | -2.35621    | -2.49724  | 0.03145 | yes         |
| XLOC_007829 | XLOC_007829 | Gm5480                    | chr16:5007380-5008401     | AAdko-FF-TTmu | AAwt-FF-TTmu | OK     | 0        | 27.3071 | Inf         | NA        | 0.01935 | yes         |
| XLOC_008899 | XLOC_008899 | H2-Q4                     | chr17:35516419-35521737   | AAdko-FF-TTmu | AAwt-FF-TTmu | OK     | 13.3257  | 2.3932  | -2.4772     | -3.10042  | 0.00325 | yes         |
| XLOC_009147 | XLOC_009147 | Pisd-ps2                  | chr17:3064317-3084183     | AAdko-FF-TTmu | AAwt-FF-TTmu | OK     | 20.3275  | 5.26918 | -1.94778    | -2.28017  | 0.03135 | yes         |
| XLOC_009279 | XLOC_009279 | Snora78                   | chr17:24856475-24856910   | AAdko-FF-TTmu | AAwt-FF-TTmu | OK     | 0        | 133.925 | Inf         | NA        | 0.01545 | yes         |
| XLOC_009391 | XLOC_009391 | Rps28                     | chr17:33959981-33961443   | AAdko-FF-TTmu | AAwt-FF-TTmu | OK     | 210.989  | 68.7868 | -1.61697    | -2.04935  | 0.0485  | yes         |
| XLOC_009398 | XLOC_009398 | H2-K1                     | chr17:34132956-34137278   | AAdko-FF-TTmu | AAwt-FF-TTmu | OK     | 13.3662  | 3.88652 | -1.78203    | -2.23996  | 0.0346  | yes         |
| XLOC_009483 | XLOC_009483 | Olfir95                   | chr17:37347857-37348796   | AAdko-FF-TTmu | AAwt-FF-TTmu | OK     | 30.8273  | 0       | #NAME?      | NA        | 0.01325 | yes         |
| XLOC_009607 | XLOC_009607 | Nrtn                      | chr17:56890747-56896953   | AAdko-FF-TTmu | AAwt-FF-TTmu | OK     | 0        | 111.405 | Inf         | NA        | 0.00005 | yes         |
| XLOC_009707 | XLOC_009707 | Kcnk12                    | chr17:88145160-88197334   | AAdko-FF-TTmu | AAwt-FF-TTmu | OK     | 0        | 12.1556 | Inf         | NA        | 0.00125 | yes         |
| XLOC_010801 | XLOC_010801 | 5730408K05Rik,<br>Mir5136 | chr19:8962876-8963264     | AAdko-FF-TTmu | AAwt-FF-TTmu | OK     | 0        | 43.995  | Inf         | NA        | 0.01135 | yes         |
| XLOC_011710 | XLOC_011710 | B2m                       | chr2:121945843-122011925  | AAdko-FF-TTmu | AAwt-FF-TTmu | OK     | 12.2998  | 3.48552 | -1.81919    | -2.24817  | 0.03355 | yes         |
| XLOC_012259 | XLOC_012259 | Lcn2                      | chr2:32240156-32243259    | AAdko-FF-TTmu | AAwt-FF-TTmu | OK     | 26.8829  | 4.70437 | -2.51462    | -3.12953  | 0.004   | yes         |
| XLOC_013341 | XLOC_013341 | Dpm3                      | chr3:89070473-89070999    | AAdko-FF-TTmu | AAwt-FF-TTmu | OK     | 44.2733  | 0       | #NAME?      | NA        | 0.01325 | yes         |
| XLOC_015109 | XLOC_015109 | Ccl27a                    | chr4:41707315-41721049    | AAdko-FF-TTmu | AAwt-FF-TTmu | OK     | 35.9914  | 0       | #NAME?      | NA        | 0.00025 | yes         |
| XLOC_015193 | XLOC_015193 | Txn1                      | chr4:57956244-57969283    | AAdko-FF-TTmu | AAwt-FF-TTmu | OK     | 13.1584  | 4.05596 | -1.69786    | -2.14829  | 0.04065 | yes         |
| XLOC_016536 | XLOC_016536 | Tyms                      | chr5:30384739-30400165    | AAdko-FF-TTmu | AAwt-FF-TTmu | OK     | 14.752   | 2.64574 | -2.47917    | -2.33415  | 0.04275 | yes         |
| XLOC_017441 | XLOC_017441 | Gm20594                   | chr6:79768024-79768358    | AAdko-FF-TTmu | AAwt-FF-TTmu | OK     | 15.9489  | 2.99524 | -2.41271    | -2.4809   | 0.035   | yes         |
| XLOC_017703 | XLOC_017703 | 2700089E24Rik             | chr6:133055256-133060917  | AAdko-FF-TTmu | AAwt-FF-TTmu | OK     | 0.338489 | 23.0983 | 6.09254     | 0.412421  | 0.00285 | yes         |
| XLOC_017796 | XLOC_017796 | Ndufa4                    | chr6:11850372-11857446    | AAdko-FF-TTmu | AAwt-FF-TTmu | OK     | 17.5255  | 3.63097 | -2.27103    | -2.38881  | 0.0392  | yes         |
| XLOC_018023 | XLOC_018023 | Tmsb10                    | chr6:72907340-72908742    | AAdko-FF-TTmu | AAwt-FF-TTmu | OK     | 19.6724  | 5.87817 | -1.74274    | -2.28863  | 0.0269  | yes         |
| XLOC_018236 | XLOC_018236 | Ptms                      | chr6:124863610-124867964  | AAdko-FF-TTmu | AAwt-FF-TTmu | OK     | 22.3767  | 6.84442 | -1.70899    | -2.25187  | 0.0315  | yes         |
| XLOC_018338 | XLOC_018338 | Mgp                       | chr6:136820955-136824326  | AAdko-FF-TTmu | AAwt-FF-TTmu | OK     | 13.4946  | 1.91519 | -2.81683    | -3.67354  | 0.00115 | yes         |

|             |             |               |                          |               |              |    |         |         |          |          |         |     |
|-------------|-------------|---------------|--------------------------|---------------|--------------|----|---------|---------|----------|----------|---------|-----|
| XLOC_018573 | XLOC_018573 | Tmem160       | chr7:17038127-17040839   | AAdko-FF-TTmu | AAwt-FF-TTmu | OK | 0       | 26.5394 | Inf      | NA       | 0.00205 | yes |
| XLOC_019642 | XLOC_019642 | Bcam          | chr7:20341486-20355881   | AAdko-FF-TTmu | AAwt-FF-TTmu | OK | 12.2092 | 3.13319 | -1.96226 | -2.52388 | 0.0198  | yes |
| XLOC_019809 | XLOC_019809 | Psenen        | chr7:31346884-31348203   | AAdko-FF-TTmu | AAwt-FF-TTmu | OK | 13.9141 | 0       | #NAME?   | NA       | 0.00005 | yes |
| XLOC_020655 | XLOC_020655 | A430078G23Rik | chr8:3353414-3390299     | AAdko-FF-TTmu | AAwt-FF-TTmu | OK | 16.312  | 3.4367  | -2.24684 | -2.69902 | 0.0133  | yes |
| XLOC_020839 | XLOC_020839 | Cldn22        | chr8:48909835-48910829   | AAdko-FF-TTmu | AAwt-FF-TTmu | OK | 0       | 12.0066 | Inf      | NA       | 0.00205 | yes |
| XLOC_021000 | XLOC_021000 | BC056474      | chr8:87604861-87606238   | AAdko-FF-TTmu | AAwt-FF-TTmu | OK | 30.5975 | 0       | #NAME?   | NA       | 0.00005 | yes |
| XLOC_022019 | XLOC_022019 | Ccdc153       | chr9:44048759-44055389   | AAdko-FF-TTmu | AAwt-FF-TTmu | OK | 2.31722 | 12.3804 | 2.41759  | 2.6138   | 0.01785 | yes |
| XLOC_022354 | XLOC_022354 | Gpx1          | chr9:108241410-108242673 | AAdko-FF-TTmu | AAwt-FF-TTmu | OK | 19.0348 | 5.56933 | -1.77306 | -2.22779 | 0.03555 | yes |

**Table S3. The predicted transcripts are targeted by miR-34/449 cluster as determined by SpliceR and RNAhybrid analyses in oviduct epithelium cells.**

| test_id     | gene_id     | gene          | locus                    | sample_1      | sample_2     | status | value_1  | value_2 | log2(fold_change) | test_stat | p_value  | q_value  | significant |
|-------------|-------------|---------------|--------------------------|---------------|--------------|--------|----------|---------|-------------------|-----------|----------|----------|-------------|
| XLOC_022905 | XLOC_022905 | Morf4l1       | chr9:89986506-90009658   | AAdko-FF-TTep | AAwt-FF-TTep | OK     | 12.7985  | 43.4155 | 1.76223           | 2.32782   | 0.02035  | 0.048232 | yes         |
| XLOC_002712 | XLOC_002712 | Skp1a         | chr11:52045496-52060360  | AAdko-FF-TTep | AAwt-FF-TTep | OK     | 9.61012  | 36.8834 | 1.94035           | 2.58727   | 0.0136   | 0.035655 | yes         |
| XLOC_011851 | XLOC_011851 | Pygb          | chr2:150612531-150657484 | AAdko-FF-TTep | AAwt-FF-TTep | OK     | 8.59465  | 34.3782 | 1.99998           | 2.45992   | 0.01955  | 0.046748 | yes         |
| XLOC_012394 | XLOC_012394 | Nfe2l2        | chr2:75513575-75542698   | AAdko-FF-TTep | AAwt-FF-TTep | OK     | 7.80734  | 29.558  | 1.92064           | 2.49927   | 0.0203   | 0.048145 | yes         |
| XLOC_017727 | XLOC_017727 | Mgst1         | chr6:138089057-138105273 | AAdko-FF-TTep | AAwt-FF-TTep | OK     | 19.8779  | 63.9097 | 1.68487           | 2.24902   | 0.02975  | 0.064703 | no          |
| XLOC_006457 | XLOC_006457 | Rpl15         | chr14:19100336-19103500  | AAdko-FF-TTep | AAwt-FF-TTep | OK     | 9.75595  | 36.599  | 1.90745           | 2.52145   | 0.0184   | 0.044764 | yes         |
| XLOC_012168 | XLOC_012168 | Tubb4b        | chr2:25074264-25080222   | AAdko-FF-TTep | AAwt-FF-TTep | OK     | 30.2615  | 136.692 | 2.17538           | 2.55934   | 0.0137   | 0.035826 | yes         |
| XLOC_017337 | XLOC_017337 | Abp1          | chr6:48845253-48859186   | AAdko-FF-TTep | AAwt-FF-TTep | OK     | 4.52454  | 16.1848 | 1.8388            | 2.31504   | 0.02565  | 0.05783  | no          |
| XLOC_007379 | XLOC_007379 | Enpp2         | chr15:54670452-54751701  | AAdko-FF-TTep | AAwt-FF-TTep | OK     | 2.86259  | 20.9623 | 2.8724            | 3.84743   | 0.0008   | 0.004974 | yes         |
| XLOC_023621 | XLOC_023621 | Ngfrap1       | chrX:132804791-132806517 | AAdko-FF-TTep | AAwt-FF-TTep | OK     | 15.5177  | 44.4118 | 1.51703           | 2.00626   | 0.04795  | 0.093305 | no          |
| XLOC_007374 | XLOC_007374 | Eif3h         | chr15:51618108-51697007  | AAdko-FF-TTep | AAwt-FF-TTep | OK     | 4.94927  | 21.7557 | 2.1361            | 2.6898    | 0.01435  | 0.037072 | yes         |
| XLOC_017434 | XLOC_017434 | Suc1g1        | chr6:73198498-73226901   | AAdko-FF-TTep | AAwt-FF-TTep | OK     | 6.36246  | 21.6557 | 1.76709           | 2.1709    | 0.03795  | 0.077501 | no          |
| XLOC_015026 | XLOC_015026 | Penk          | chr4:4060682-4065961     | AAdko-FF-TTep | AAwt-FF-TTep | OK     | 2.29676  | 15.6321 | 2.76684           | 2.72886   | 0.02065  | 0.048815 | yes         |
| XLOC_008117 | XLOC_008117 | Il10rb        | chr16:91406479-91426079  | AAdko-FF-TTep | AAwt-FF-TTep | OK     | 3.37299  | 11.7382 | 1.79912           | 2.15508   | 0.04265  | 0.085042 | no          |
| XLOC_022083 | XLOC_022083 | Dnaja4        | chr9:54547365-54564124   | AAdko-FF-TTep | AAwt-FF-TTep | OK     | 2.61608  | 20.5333 | 2.97249           | 3.77457   | 0.00225  | 0.009915 | yes         |
| XLOC_001209 | XLOC_001209 | Adss          | chr1:179693308-179726640 | AAdko-FF-TTep | AAwt-FF-TTep | OK     | 2.13389  | 12.6792 | 2.5709            | 3.25595   | 0.0052   | 0.017442 | yes         |
| XLOC_012224 | XLOC_012224 | 1700007K13Rik | chr2:28317520-28321854   | AAdko-FF-TTep | AAwt-FF-TTep | OK     | 5.54326  | 38.3007 | 2.78856           | 3.30961   | 0.0044   | 0.015587 | yes         |
| XLOC_022725 | XLOC_022725 | 1110032A03Rik | chr9:50570932-50576257   | AAdko-FF-TTep | AAwt-FF-TTep | OK     | 2.86873  | 17.5336 | 2.61164           | 3.33409   | 0.0042   | 0.015174 | yes         |
| XLOC_003662 | XLOC_003662 | Dnahc9        | chr11:65644825-65982053  | AAdko-FF-TTep | AAwt-FF-TTep | OK     | 1.50284  | 15.7136 | 3.38625           | 4.07772   | 0.00045  | 0.003447 | yes         |
| XLOC_008748 | XLOC_008748 | Tekt4         | chr17:25608534-25613539  | AAdko-FF-TTep | AAwt-FF-TTep | OK     | 2.5318   | 11.6931 | 2.20742           | 2.31829   | 0.04185  | 0.083723 | no          |
| XLOC_020954 | XLOC_020954 | Ttc29         | chr8:80737240-80918225   | AAdko-FF-TTep | AAwt-FF-TTep | OK     | 0.681035 | 13.8823 | 4.34937           | 4.78117   | 0.003    | 0.01203  | yes         |
| XLOC_011868 | XLOC_011868 | 6820408C15Rik | chr2:152241322-152270064 | AAdko-FF-TTep | AAwt-FF-TTep | OK     | 0        | 14.1252 | inf               | #NAME?    | 5.00E-05 | 0.000771 | yes         |
| XLOC_013278 | XLOC_013278 | -             | chr3:75162280-75186007   | AAdko-FF-TTep | AAwt-FF-TTep | OK     | 0        | 43.51   | #NAME?            | NA        | 0.03515  | 0.073245 | no          |
| XLOC_011612 | XLOC_011612 | -             | chr2:106069573-106181753 | AAdko-FF-TTep | AAwt-FF-TTep | OK     | 0        | 13.7481 | #NAME?            | NA        | 0.0307   | 0.066097 | no          |

**Table S4. Primer sequences for real-time qPCR in this study.**

| Gene symbol    | Forward (5' → 3')       | Reverse (5' → 3')        |
|----------------|-------------------------|--------------------------|
| <i>Foxj1</i>   | CATCTACAAGTGGATCACGGAC  | GAGCAGGCGCTCTGCGTACTG    |
| <i>Tubb4a</i>  | AACCCGGCACCATGGACTCTGT  | TGCCTGCTCCGGATTGACCAAATA |
| <i>Ovgp1</i>   | TGGACCCCTTTCTTTGTACG    | TGGACAGCAGTGTTTTTCAGC    |
| <i>Pax8</i>    | ATGCCTCACAACTCGATCAGA   | ACAATGCGTTGACGTACAACCTT  |
| <i>Des</i>     | ACTTGACTCAGGCAGCCAAT    | ATCCTCCAGCTCCCTCATCT     |
| <i>Krt8</i>    | ATCGAGATCACCCACCTACCG   | TGAAGCCAGGGCTAGTGAGT     |
| <i>Acta2</i>   | GAGGCACCACTGAACCCTAA    | CATCTCCAGAGTCCAGCACA     |
| <i>Morf4l1</i> | CCAGGCGCTCTGAAAAATCTT   | CCCATTTCATCCCAACTAGAGGT  |
| <i>Skp1a</i>   | ATGCCTACGATAAAGTTGCAGAG | TCCATTCCCAAATCTTCCAGC    |
| <i>Pygb</i>    | CCGCGACTACTTCTTCGCTC    | CAACCCCAACTGATAAGTGCC    |
| <i>Nfe2l2</i>  | TCTTGGAGTAAGTCGAGAAGTGT | GTTGAAACTGAGCGAAAAAGGC   |

|                      |                         |                         |
|----------------------|-------------------------|-------------------------|
| <i>Mgst1</i>         | CTCAGGCAGCTCATGGACAAT   | GTTATCCTCTGGAATGCGGTC   |
| <i>Rpl15</i>         | ATGGGTGCATACAAGTACATCCA | CAGTCTTCGAGCTTTATCAGGC  |
| <i>Tubb4b</i>        | CACTTACCACGGAGATAGCGA   | ACCTTCTGTGTAGTGCCCCTT   |
| <i>Abp1</i>          | TGGGGCTGGAGTCATCCAA     | TCCCGGACAGGACTTTTTCTT   |
| <i>Enpp2</i>         | TTTGCACTATGCCAACAATCGG  | GGAGGCACTTTAGTCCTGTACTT |
| <i>Ngfrap1</i>       | CAATGTCCACCAGGAAAACGA   | GGAAGTTAGGGGCAAGTCGG    |
| <i>Eif3h</i>         | ACAAGGCACTGAGGTTGTTCA   | CGAAGGAGCCGTAATATGTGGA  |
| <i>Suclg1</i>        | TGGGATACGACACGGGTCTTA   | CAGAAGCCGTTGCTCCTGTT    |
| <i>Penk</i>          | TGCGCTAAATGCACGTACC     | TCCCAGATTTTGAAAGAAGGCAG |
| <i>Il10rb</i>        | ACCTGCTTTCCCCAAAACGAA   | TGAGAGAAGTCGCACTGAGTC   |
| <i>Dnaja4</i>        | GGTGGAGGACGGATGACTAGA   | GGGCCAGTTTCTTAGTGATTCC  |
| <i>Adss</i>          | ACACGGGGTAGAGAATTTGGA   | GGTAAGGGCCAACGCAGTA     |
| <i>1700007K13Rik</i> | AGAAGACCAGCGACTACTACC   | TGCTTCCGTAGGTTTGGTTAC   |

|                      |                         |                         |
|----------------------|-------------------------|-------------------------|
| <i>1110032A03Rik</i> | CCAGCAAATCACTGTATTCACCA | GCTGCCATAGTGTGGGTTTCTAA |
| <i>Dnahc9</i>        | AGGCTATGAGAGTGCCATGAA   | GATCTTTTGCCTGTCCCCCTT   |
| <i>Tekt4</i>         | GGCCCCACAGTCAATAGATGT   | GGGCATAAGAGTTCTGAAACCA  |
| <i>Ttc29</i>         | CTTCCCATGACTCATACAAGGC  | CCCTTTGAAATTCTGTTCCAGGT |
| <i>6820408C15Rik</i> | ATGGCACAGAAACAAACCTCG   | GGAGGCAGAGTAGATGGCTTC   |
| <i>Gapdh</i>         | AACTTTGGCATTGTGGAAGG    | ACACATTGGGGGTAGGAACA    |
